# Supplementary material for: Comparative Transcriptome Analysis Identifying the Different Molecular Genetic Markers Related to Production Performance and Meat Quality in Longissimus Dorsi Tissues of MG × STH and STH Sheep
Source: Genes (Basel). 2020 Feb 10;11(2):183. doi: 10.3390/genes11020183 (PMC7074365; doi:10.3390/genes11020183)
Supplement: Supplementary file 1 [file genes-11-00183-s001.xlsx]

## Sheet: Table S1
Table S1 Ingredients and Nutritionlevel of experimental dietary formula
Ingredients	Ratio (%)
Corn	38
Flax cake	9
Soybean meal	10
Wheat bran	2
Dry Alfalfa	12
Oat grass	10
Millet straw	3
Barley straw	5
Corn cob with core (Ground)	10
Premix	1
Dry Matter（%）	90.2
crude protein(%)	15.99
Metabolizable energy(MJ/kg)	9.93
Calcium（%）	0.52
磷 Phosp(%)	0.4
Neutral Detergent Fiber(NDF)	47.87
Acid Detergent Fiber(ADF)	31.21

## Sheet: Table S2
Table S2. qPCR primer sequences.
Symbols	sequence 5'-3'	length (bp)
ADIPOQ	TTCACCCACGACCAGTTCC	135
	GTTATCCGCATAGACCCCAT
IFRD1	GGCATGTACCAGGAAGCAGT	250
	CTCAGTTGGTGCCTGGGTAT
PLCB1	AAGCTTCCAACACGTACAGC	209
	TGACTCGAACTTGACTGGCT
ITGB3	AGAAGGCCTCCTTCCTTCAG	189
	AAGCAGAAAGACAGGGCAAA
HEG1	CGCTCGACCATTGAAGACAG	152
	TTGGTGAGAGATCGCAGTGT
HEYL	CCAGCCCTTCACAAATGCAA	158
	CAGGACCTCAGCTTTCTCCA
SPARC	AAGTCGAGGAAGAGGTGGTG	150
	CCTTCTCAAACTCGCCGATG
FNDC5	CATCCAGGGTCAGAGTCCAG	162
	AACAGGACCACGACGATGAT
ACVRL1	GTTCGTCAACCACTACTGCT	150
	ACGAGTACTAGCAAGGCCAG
NMRK2	TACTTCCTGACCGTCCCCTA	155
	TACACCACTTCCACACCGTT
GPX1	GCAACCAGTTTGGGCATCA	124
	CCATTCACCTCGCACTTTTC
ACTB	TCCGTGACATCAAGGAGAAGC	176
	CAGGAAGGAAGGCTGGAAGA

## Sheet: Table S3
Table S3. Differences in production performance and meat quality between the STH×MG and STH sheep breeds.
Indexes	STH×MG	STH	P Value
Body height (cm)	63.83±0.82	62.17±1.57	0.133
Body length (cm)	68.08±1.59	70.00±2.45	0.197
Chest circumference (cm)	84.33±2.71	68.67±1.94	＜0.001
Live-weight (kg)	38.26±1.40	28.01±2.47	＜0.001
Carcass weight (kg)	19.75±0.54	12.73±0.99	＜0.001
Net-meat weight (kg)	14.61±0.47	9.30±0.79	＜0.001
Net-meat percentage (%)	38.20±1.20	33.22±0.52	＜0.05
Meat bone ratio (%)	3.47±0.11	3.14±0.08	＜0.05
Dressing percentage (%)	51.64±1.39	45.51±1.05	＜0.01
Loin eye area (cm2)	14.04±0.97	11.76±0.60	＜0.01
Back meat thick (cm）	1.83±0.07	1.64±0.06	＜0.01
pH	5.46±0.07	5.56±0.06	0.16
Marbling grade	2.50±0.45	1.45±0.38	＜0.05
Water loss rate (%)	15.28±3.52	9.77±1.34	0.246
Cooking loss (%)	28.79±0.28	36.22±0.65	＜0.001
Brightness (L*)	32.35±0.82	35.93±4.43	0.195
Redness (a*)	12.25±1.24	10.42±0.94	0.035
Yellowness (b*)	8.38±0.97	9.18±1.06	＜0.001
Shear force of kgf	2.14±0.14	2.58±0.14	＜0.001
P < 0.001 represent significant differences compared with SHT sheep breed; P < 0.05:represent differences compared with SHT sheep breed.

## Sheet: Table S4
Table S4. Summary of transcriptomic sequence read mapping in sheep genome V1.0
Sample	Clean Data (bp)	HQ Clean Data (bp)	Filter total Pair Reads	Unique Mapped Pair Reads	Mapping Ratio
STH1	10793742362	10738865766	68793420	50717048	0.7442
STH2	10218998155	10167762410	67088492	52908475	0.7962
STH3	9609088359	9558576789	63466850	50100849	0.7973
STH4	9864384240	9805315272	65135482	51297178	0.7954
STH5	10114592547	10058306387	66417810	51240912	0.7796
STH6	11069022361	11004278518	72422358	55907174	0.7792
STH1×MG	9015477193	8964144642	59395860	46781524	0.7954
STH2×MG	9967180764	9909941577	65695336	51840162	0.7961
STH3×MG	9918820257	9865168538	65376786	51199882	0.7902
STH4×MG	10361956283	10300141874	68036506	53064270	0.7875
STH5×MG	9877031218	9809997930	65057954	49836298	0.773
STH6×MG	9943987677	9888249604	63391298	46335265	0.7374

## Sheet: Table S5
Table S5. DEGs of the comparative transcriptome analysis in the STH×MG and the STH sheep breeds
No.	Id	STH_count	STH-MG_count	STH_fpkm	STH-MG_fpkm	log2(FC)	Pvalue	FDR	significant	Symbol	Description	KEGG_A_class	KEGG_B_class	Pathway	K_ID	GO Component	GO Function	GO Process
1	XLOC_001365	0	119	0.001	34.5333	9.59657	6.06501e-05	0.0069138	up	TCONS_00004748	> XP_005966019.1 PREDICTED: phosphatidylinositol 3-kinase regulatory subunit gamma isoform X1 [Pantholops hodgsonii]	Organismal Systems;Cellular Processes;Environmental Information Processing	Nervous system;Cellular commiunity;Excretory system;Cell growth and death;Sensory system;Digestive system;Circulatory system;Endocrine system;Signal transduction;Cell motility;Immune system;Development	ko04151//PI3K-Akt signaling pathway;ko04014//Ras signaling pathway;ko04810//Regulation of actin cytoskeleton;ko04510//Focal adhesion;ko04015//Rap1 signaling pathway;ko04024//cAMP signaling pathway;ko04022//cGMP - PKG signaling pathway;ko04630//Jak-STAT signaling pathway;ko04062//Chemokine signaling pathway;ko04921//Oxytocin signaling pathway;ko04261//Adrenergic signaling in cardiomyocytes;ko04550…	K02649	-	-	-
2	XLOC_002239	0.333333	27.8333	0.0333333	2.69	5.65401	0.00195011	0.045979	up	TCONS_00007933	-	-	-	-	-	-	-	-
3	XLOC_003685	2271.17	9170.33	83.945	361.74	2.39469	0.000134715	0.0104876	up	TCONS_00012346	> XP_005954233.1 PREDICTED: heat shock protein beta-7 isoform X2 [Pantholops hodgsonii]	-	-	-	-	GO:0005623//cell;GO:0043229//intracellular organelle;GO:0031974//membrane-enclosed lumen;GO:0043231//intracellular membrane-bounded organelle;GO:0044424//intracellular part;GO:0005634//nucleus;GO:0016604//nuclear body;GO:0043227//membrane-bounded organelle;GO:0016234//inclusion body;GO:0043226//organelle;GO:0043232//intracellular non-membrane-bounded organelle;GO:0070013//intracellular organelle …	GO:0008092//cytoskeletal protein binding;GO:0005515//protein binding;GO:0005488//binding	GO:0032501//multicellular organismal process;GO:0010033//response to organic substance;GO:0003008//system process;GO:0003013//circulatory system process;GO:0008015//blood circulation;GO:0042221//response to chemical;GO:0050896//response to stimulus;GO:0035966//response to topologically incorrect protein;GO:0006950//response to stress;GO:0060047//heart contraction;GO:0003015//heart process
4	XLOC_003936	0.333333	23.1667	0.0316667	2.17667	5.56379	9.08813e-07	0.000451236	up	TCONS_00013334	-	-	-	-	-	-	-	-
5	XLOC_004948	1991.17	715.167	42.7383	15.55	-1.24387	0.00201283	0.0467491	down	TCONS_00016340	> XP_006109137.2 PREDICTED: collagen alpha-1(V) chain-like [Myotis lucifugus]	-	-	-	-	GO:0005583//fibrillar collagen trimer;GO:0043231//intracellular membrane-bounded organelle;GO:0043229//intracellular organelle;GO:0005578//proteinaceous extracellular matrix;GO:0005783//endoplasmic reticulum;GO:0044444//cytoplasmic part;GO:0043230//extracellular organelle;GO:0005581//collagen trimer;GO:0005737//cytoplasm;GO:0044446//intracellular organelle part;GO:0043226//organelle;GO:0032991//m…	GO:0005488//binding;GO:0097367//carbohydrate derivative binding;GO:0005539//glycosaminoglycan binding;GO:0005198//structural molecule activity;GO:0001948//glycoprotein binding;GO:0043167//ion binding;GO:0019838//growth factor binding;GO:0005102//receptor binding;GO:0043169//cation binding;GO:0005515//protein binding	GO:0061448//connective tissue development;GO:0001704//formation of primary germ layer;GO:0009888//tissue development;GO:0048598//embryonic morphogenesis;GO:0009058//biosynthetic process;GO:0043062//extracellular structure organization;GO:0051674//localization of cell;GO:0008152//metabolic process;GO:0044319//wound healing, spreading of cells;GO:0035987//endodermal cell differentiation;GO:0007492/…
6	XLOC_006804	0.5	24.1667	0.06	2.855	5.04001	0.00199897	0.0466699	up	TCONS_00022698	> EAW58000.1 hCG2040771, partial [Homo sapiens]	-	-	-	-	-	-	-
7	XLOC_007981	4.33333	38.8333	0.203333	1.94	3.12026	0.000164581	0.0119004	up	TCONS_00025632	> pir||S36287 T-cell receptor gamma chain - sheep (fragment)// CAA78310.1 TCR gamma, partial [Ovis aries]	-	-	-	-	-	-	-
8	XLOC_008023	26.8333	167.833	0.495	3.24167	2.51423	0.00136572	0.0375593	up	TCONS_00025747	> XP_001252629.4 PREDICTED: small lysine-rich protein 1 [Bos taurus]// XP_002686985.3 PREDICTED: small lysine-rich protein 1 [Bos taurus]	-	-	-	-	-	-	-
9	XLOC_009259	88.5	30.1667	0.64	0.226667	-1.52813	0.00118423	0.0342279	down	TCONS_00029407	> ELR59460.1 Peroxisomal N(1)-acetyl-spermine/spermidine oxidase, partial [Bos mutus]	-	-	-	-	GO:0005622//intracellular;GO:0005737//cytoplasm;GO:0044424//intracellular part;GO:0043229//intracellular organelle;GO:0005623//cell;GO:0044464//cell part;GO:0043227//membrane-bounded organelle;GO:0043226//organelle;GO:0042579//microbody;GO:0043231//intracellular membrane-bounded organelle;GO:0044444//cytoplasmic part	GO:0016647//oxidoreductase activity, acting on the CH-NH group of donors, oxygen as acceptor;GO:0016645//oxidoreductase activity, acting on the CH-NH group of donors;GO:0005488//binding;GO:0005515//protein binding;GO:0003824//catalytic activity;GO:0016491//oxidoreductase activity	GO:0006596//polyamine biosynthetic process;GO:1901576//organic substance biosynthetic process;GO:0042401//cellular biogenic amine biosynthetic process;GO:0009987//cellular process;GO:1901575//organic substance catabolic process;GO:0006598//polyamine catabolic process;GO:1901566//organonitrogen compound biosynthetic process;GO:0071704//organic substance metabolic process;GO:0044710//single-organis…
10	XLOC_010030	6.65667	0	0.738333	0.001	-5.65426	0.000309553	0.0161597	down	TCONS_00031779	-	-	-	-	-	-	-	-
11	XLOC_012037	83	26.3333	2.89	0.951667	-1.61173	0.00200866	0.04673	down	TCONS_00038172	-	-	-	-	-	-	-	-
12	XLOC_012547	0	22	0.001	1.74333	7.17105	0.00184569	0.044582	up	TCONS_00039611	-	-	-	-	-	-	-	-
13	XLOC_012554	58.5	15.1667	0.458333	0.121667	-1.91906	0.000868019	0.0289465	down	TCONS_00039631	> CAA10770.1 reverse transcriptase-like [Bos taurus]	-	-	-	-	GO:0016020//membrane	-	-
14	XLOC_012729	21	3	1.805	0.301667	-2.70487	0.00069374	0.025301	down	TCONS_00040257	-	-	-	-	-	-	-	-
15	XLOC_012835	75.655	22.6867	1.02833	0.316667	-1.73535	0.00187198	0.0449255	down	TCONS_00040681	> XP_011952579.1 PREDICTED: centrosomal protein of 72 kDa isoform X3 [Ovis aries]	-	-	-	-	-	-	-
16	XLOC_013278	39.3333	4.83333	0.685	0.0833333	-2.72737	0.00136688	0.0375593	down	TCONS_00041741	> ELR51300.1 PR domain zinc finger protein 12, partial [Bos mutus]	Environmental Information Processing	Signaling molecules and interaction	ko04514//Cell adhesion molecules (CAMs)	K06797	GO:0016020//membrane	-	GO:0007155//cell adhesion;GO:0022610//biological adhesion
17	XLOC_013281	30.3633	0	0.298333	0.001	-7.93559	0.000293157	0.0157447	down	TCONS_00041746	> XP_011989763.1 PREDICTED: EF-hand calcium-binding domain-containing protein 1 isoform X5 [Ovis aries musimon]	-	-	-	-	GO:0044464//cell part;GO:0043226//organelle;GO:0005737//cytoplasm;GO:0044424//intracellular part;GO:0043229//intracellular organelle;GO:0043231//intracellular membrane-bounded organelle;GO:0005623//cell;GO:0044444//cytoplasmic part;GO:0043227//membrane-bounded organelle;GO:0005622//intracellular	GO:0016491//oxidoreductase activity;GO:0005488//binding;GO:0005515//protein binding;GO:0003824//catalytic activity;GO:0016645//oxidoreductase activity, acting on the CH-NH group of donors;GO:0016647//oxidoreductase activity, acting on the CH-NH group of donors, oxygen as acceptor	GO:0044710//single-organism metabolic process;GO:1901565//organonitrogen compound catabolic process;GO:0006598//polyamine catabolic process;GO:0044699//single-organism process;GO:0002376//immune system process;GO:0042402//cellular biogenic amine catabolic process;GO:0050896//response to stimulus;GO:1901566//organonitrogen compound biosynthetic process;GO:0006950//response to stress;GO:0009889//re…
18	XLOC_013358	0	35.8117	0.001	9.745	7.86867	0.000798321	0.0276541	up	TCONS_00042004	PREDICTED: uncharacterized protein LOC105601929 [Ovis aries]	-	-	-	-	-	-	-
19	XLOC_013573	97.3883	18.5467	0.97	0.193333	-2.25053	0.000211499	0.0133113	down	TCONS_00042942	> XP_011989763.1 PREDICTED: EF-hand calcium-binding domain-containing protein 1 isoform X5 [Ovis aries musimon]	-	-	-	-	GO:0043229//intracellular organelle;GO:0043227//membrane-bounded organelle;GO:0043226//organelle;GO:0044424//intracellular part;GO:0044444//cytoplasmic part;GO:0005737//cytoplasm;GO:0005623//cell;GO:0005622//intracellular;GO:0043231//intracellular membrane-bounded organelle;GO:0044464//cell part	GO:0016491//oxidoreductase activity;GO:0005488//binding;GO:0016647//oxidoreductase activity, acting on the CH-NH group of donors, oxygen as acceptor;GO:0003824//catalytic activity;GO:0005515//protein binding;GO:0016645//oxidoreductase activity, acting on the CH-NH group of donors	GO:0071704//organic substance metabolic process;GO:0006596//polyamine biosynthetic process;GO:0006598//polyamine catabolic process;GO:0042401//cellular biogenic amine biosynthetic process;GO:0044106//cellular amine metabolic process;GO:0050789//regulation of biological process;GO:0009308//amine metabolic process;GO:0006952//defense response;GO:1901565//organonitrogen compound catabolic process;GO…
20	XLOC_014009	4338.53	1816.31	51.1167	22.3867	-1.09058	0.000983707	0.0307829	down	TCONS_00043933	> XP_014956989.1 PREDICTED: protein ADP-ribosylarginine hydrolase-like protein 1 isoform X2 [Ovis aries musimon]	-	-	-	-	-	-	-
21	XLOC_016336	343.333	163.667	4.3	2.125	-1.04045	0.000348537	0.0169772	down	TCONS_00050642	-	-	-	-	-	-	-	-
22	XLOC_016667	1.66667	44	0.346667	9.50833	4.41092	0.000343013	0.0169556	up	TCONS_00051779	-	-	-	-	-	-	-	-
23	XLOC_016974	0	13.5	0.001	0.938333	6.4827	0.00206875	0.0477007	up	TCONS_00052502	-	-	-	-	-	-	-	-
24	XLOC_017126	149.74	30.07	0.445	0.0966667	-2.07077	0.000666625	0.0246596	down	TCONS_00052983	> XP_019812017.1 PREDICTED: protein eva-1 homolog C isoform X2 [Bos indicus]	-	-	-	-	GO:0005737//cytoplasm;GO:0044444//cytoplasmic part;GO:0044464//cell part;GO:0005622//intracellular;GO:0005623//cell;GO:0043227//membrane-bounded organelle;GO:0043231//intracellular membrane-bounded organelle;GO:0043229//intracellular organelle;GO:0043226//organelle;GO:0044424//intracellular part	GO:0003824//catalytic activity;GO:0016491//oxidoreductase activity;GO:0016645//oxidoreductase activity, acting on the CH-NH group of donors;GO:0005488//binding;GO:0016647//oxidoreductase activity, acting on the CH-NH group of donors, oxygen as acceptor	GO:0055114//oxidation-reduction process;GO:0006576//cellular biogenic amine metabolic process;GO:0009058//biosynthetic process;GO:1901566//organonitrogen compound biosynthetic process;GO:0006596//polyamine biosynthetic process;GO:0006595//polyamine metabolic process;GO:0006807//nitrogen compound metabolic process;GO:0009308//amine metabolic process;GO:0008152//metabolic process;GO:0044699//single…
25	XLOC_017980	80.8333	8.83333	0.955	0.101667	-2.89331	0.000131013	0.0103435	down	TCONS_00055422	> XP_010818099.1 PREDICTED: peroxisomal N(1)-acetyl-spermine/spermidine oxidase isoform X2 [Bos taurus]	-	-	-	-	GO:0005622//intracellular;GO:0005623//cell;GO:0005737//cytoplasm;GO:0042579//microbody;GO:0043227//membrane-bounded organelle;GO:0044424//intracellular part;GO:0044444//cytoplasmic part;GO:0043231//intracellular membrane-bounded organelle;GO:0043226//organelle;GO:0043229//intracellular organelle;GO:0044464//cell part	GO:0016647//oxidoreductase activity, acting on the CH-NH group of donors, oxygen as acceptor;GO:0016491//oxidoreductase activity;GO:0003824//catalytic activity;GO:0005515//protein binding;GO:0016645//oxidoreductase activity, acting on the CH-NH group of donors;GO:0005488//binding	GO:0009309//amine biosynthetic process;GO:0009058//biosynthetic process;GO:0008216//spermidine metabolic process;GO:0042401//cellular biogenic amine biosynthetic process;GO:0044699//single-organism process;GO:1901576//organic substance biosynthetic process;GO:0006598//polyamine catabolic process;GO:0009308//amine metabolic process;GO:0006807//nitrogen compound metabolic process;GO:0009056//catabo…
26	XLOC_018762	0	28.6667	0.001	4.705	7.55836	0.000585718	0.0229995	up	TCONS_00057787	> EAW82783.1 hCG2025265, partial [Homo sapiens]	-	-	-	-	-	-	-
27	XLOC_021381	117.333	1347.33	20.0217	242.302	3.44344	3.09475e-05	0.00476869	up	TCONS_00064810	> AAX45027.1 immunoglobulin lambda light chain F7-299 [Capra hircus]	-	-	-	-	-	-	-
28	XLOC_022059	0	25.5	0.001	2.85167	7.38186	0.00142166	0.0383163	up	TCONS_00066769	-	-	-	-	-	-	-	-
29	XLOC_022236	228.012	61.485	1.04333	0.281667	-1.8906	0.000405192	0.0189002	down	TCONS_00067228	> NP_001040099.1 bitter taste receptor Bota-T2R65A [Bos taurus]// BAE80356.1 bitter taste receptor [Bos taurus]// DAA29344.1 TPA: bitter taste receptor Bota-T2R65A [Bos taurus]	-	-	-	-	GO:0031224//intrinsic component of membrane;GO:0044425//membrane part;GO:0005576//extracellular region;GO:0016020//membrane	GO:0043167//ion binding;GO:0004872//receptor activity;GO:0005488//binding;GO:0060089//molecular transducer activity;GO:0004871//signal transducer activity;GO:0099600//transmembrane receptor activity;GO:0038023//signaling receptor activity;GO:0004888//transmembrane signaling receptor activity	GO:0051716//cellular response to stimulus;GO:0007606//sensory perception of chemical stimulus;GO:0040013//negative regulation of locomotion;GO:0007275//multicellular organism development;GO:0048646//anatomical structure formation involved in morphogenesis;GO:0065007//biological regulation;GO:0050877//neurological system process;GO:0044767//single-organism developmental process;GO:0032501//multice…
30	XLOC_022556	203.702	58.9733	1.01167	0.306667	-1.82381	3.69153e-05	0.00539084	down	TCONS_00068308	> NP_001040099.1 bitter taste receptor Bota-T2R65A [Bos taurus]// BAE80356.1 bitter taste receptor [Bos taurus]// DAA29344.1 TPA: bitter taste receptor Bota-T2R65A [Bos taurus]	-	-	-	-	GO:0016020//membrane;GO:0031224//intrinsic component of membrane;GO:0005576//extracellular region;GO:0044425//membrane part	GO:0005488//binding;GO:0060089//molecular transducer activity;GO:0004871//signal transducer activity;GO:0099600//transmembrane receptor activity;GO:0004888//transmembrane signaling receptor activity;GO:0004872//receptor activity;GO:0038023//signaling receptor activity;GO:0043167//ion binding	GO:0044763//single-organism cellular process;GO:0001568//blood vessel development;GO:0023052//signaling;GO:0065007//biological regulation;GO:0072359//circulatory system development;GO:0050794//regulation of cellular process;GO:0048646//anatomical structure formation involved in morphogenesis;GO:0044699//single-organism process;GO:0044767//single-organism developmental process;GO:0044707//single-m…
31	XLOC_022589	88.74	1507.37	3.21333	57.455	4.01367	1.27714e-05	0.00271794	up	TCONS_00068372	> CAA49451.1 immunoglobulin gamma-1 chain, partial [Ovis aries]	Organismal Systems;Cellular Processes;Environmental Information Processing	Immune system;Signal transduction;Transport and catabolism	ko04151//PI3K-Akt signaling pathway;ko04020//Calcium signaling pathway;ko04145//Phagosome;ko04650//Natural killer cell mediated cytotoxicity;ko04064//NF-kappa B signaling pathway;ko04640//Hematopoietic cell lineage;ko04666//Fc gamma R-mediated phagocytosis;ko04664//Fc epsilon RI signaling pathway;ko04662//B cell receptor signaling pathway;ko04672//Intestinal immune network for IgA production	K06856	-	-	-
32	XLOC_023629	43	7.5	0.59	0.11	-2.30625	0.00167045	0.0418888	down	TCONS_00071730	> XP_020012665.1 uncharacterized LOC101929726 homolog [Castor canadensis]	-	-	-	-	-	-	-
33	XLOC_024660	69.7917	21.1617	1.14167	0.363333	-1.56912	0.000931233	0.0298088	down	TCONS_00074286	> CAA10770.1 reverse transcriptase-like [Bos taurus]	-	-	-	-	GO:0044425//membrane part;GO:0005623//cell;GO:0031224//intrinsic component of membrane;GO:0044464//cell part;GO:0016020//membrane	GO:0043167//ion binding;GO:0043168//anion binding;GO:0005488//binding;GO:0005515//protein binding	GO:0065008//regulation of biological quality;GO:0007155//cell adhesion;GO:0065007//biological regulation;GO:0098602//single organism cell adhesion;GO:0009987//cellular process;GO:0044057//regulation of system process;GO:0022610//biological adhesion;GO:0044260//cellular macromolecule metabolic process;GO:0050789//regulation of biological process;GO:0044237//cellular metabolic process;GO:0050794//r…
34	XLOC_024811	946.115	381.3	18.4333	7.92	-1.16199	0.000618317	0.0237781	down	TCONS_00074706	> EHB09828.1 Enterin neuropeptide, partial [Heterocephalus glaber]	-	-	-	-	-	-	-
35	XLOC_026391	552.977	4362.33	21.6733	173.292	3.03622	4.1676e-05	0.00600753	up	TCONS_00079275	> XP_006059809.1 PREDICTED: interleukin-32 isoform X3 [Bubalus bubalis]	-	-	-	-	-	-	-
36	XLOC_026583	58.8333	1.5	1.71	0.045	-5.00089	2.22255e-06	0.000832073	down	TCONS_00079877	-	-	-	-	-	-	-	-
37	XLOC_026955	4.66667	204.5	0.32	14.6933	5.12785	0.000182244	0.0124522	up	TCONS_00080779	> EDM17335.1 rCG40276 [Rattus norvegicus]	-	-	-	-	-	-	-
38	XLOC_027151	1.16667	20	0.0466667	0.87	3.76515	0.000627594	0.023881	up	TCONS_00081320	> XP_007114926.1 PREDICTED: platelet-derived growth factor subunit A [Physeter catodon]	Cellular Processes;Environmental Information Processing	Cellular commiunity;Cell motility;Signal transduction;Signaling molecules and interaction	ko04151//PI3K-Akt signaling pathway;ko04060//Cytokine-cytokine receptor interaction;ko04010//MAPK signaling pathway;ko04014//Ras signaling pathway;ko04810//Regulation of actin cytoskeleton;ko04510//Focal adhesion;ko04015//Rap1 signaling pathway;ko04540//Gap junction	K04359	-	-	-
39	XLOC_028156	0.333333	5	0.0583333	0.853333	3.47763	0.00217691	0.0495302	up	TCONS_00084298	-	-	-	-	-	-	-	-
40	XLOC_028465	147.833	29.1667	3.67667	0.751667	-2.16085	4.55124e-05	0.0064103	down	TCONS_00085328	PREDICTED: uncharacterized protein LOC101046212 isoform X1 [Saimiri boliviensis boliviensis]	-	-	-	-	-	-	-
41	XLOC_028879	0	38.5	0.001	6.87833	7.97154	0.000720933	0.025842	up	TCONS_00086836	> XP_003365943.1 PREDICTED: spermatid nuclear transition protein 4 [Equus caballus]// XP_008535293.1 PREDICTED: spermatid nuclear transition protein 3-like [Equus przewalskii]	-	-	-	-	-	-	-
42	XLOC_029341	84.825	227.06	8.73667	26.32	1.39977	0.00128925	0.0361882	up	TCONS_00087727	> CAX32932.1 T-cell receptor beta chain, partial [Ovis aries]	Organismal Systems;Environmental Information Processing	Immune system;Signal transduction;Signaling molecules and interaction	ko04014//Ras signaling pathway;ko04015//Rap1 signaling pathway;ko04020//Calcium signaling pathway;ko04514//Cell adhesion molecules (CAMs);ko04660//T cell receptor signaling pathway;ko04064//NF-kappa B signaling pathway;ko04612//Antigen processing and presentation;ko04672//Intestinal immune network for IgA production	K10785	GO:0031224//intrinsic component of membrane;GO:0044425//membrane part;GO:0016020//membrane	-	-
43	XLOC_029598	19	96.8333	2.03667	10.8717	2.33406	0.000293007	0.0157447	up	TCONS_00088098	> XP_010804344.2 PREDICTED: Ig heavy chain V region PJ14 isoform X2 [Bos taurus]	-	-	-	-	-	-	-
44	XLOC_029605	44.6667	12	1.525	0.418333	-1.73744	0.00199061	0.0465232	down	TCONS_00088109	> XP_010815684.2 PREDICTED: transcription factor IIIB 90 kDa subunit isoform X1 [Bos taurus]// XP_005196409.2 PREDICTED: transcription factor IIIB 90 kDa subunit isoform X1 [Bos taurus]	-	-	-	-	GO:0005622//intracellular;GO:0043231//intracellular membrane-bounded organelle;GO:0005623//cell;GO:0043227//membrane-bounded organelle;GO:0043229//intracellular organelle;GO:0044424//intracellular part;GO:0044464//cell part;GO:0043226//organelle	GO:0016645//oxidoreductase activity, acting on the CH-NH group of donors;GO:0005488//binding;GO:0003824//catalytic activity;GO:0005515//protein binding;GO:0016491//oxidoreductase activity;GO:0016647//oxidoreductase activity, acting on the CH-NH group of donors, oxygen as acceptor	GO:0009308//amine metabolic process;GO:0022414//reproductive process;GO:0044763//single-organism cellular process;GO:0051321//meiotic cell cycle;GO:0071840//cellular component organization or biogenesis;GO:0048285//organelle fission;GO:0006807//nitrogen compound metabolic process;GO:0006576//cellular biogenic amine metabolic process;GO:0008152//metabolic process;GO:0048731//system development;GO:…
45	XLOC_029622	41.76	363.462	3.42833	30.2333	3.01173	0.000144572	0.0108855	up	TCONS_00088138	> ABQ51194.1 immunoglobulin gamma 2 heavy chain constant region, partial [Capra hircus]	Organismal Systems;Cellular Processes;Environmental Information Processing	Immune system;Signal transduction;Transport and catabolism	ko04151//PI3K-Akt signaling pathway;ko04020//Calcium signaling pathway;ko04145//Phagosome;ko04650//Natural killer cell mediated cytotoxicity;ko04064//NF-kappa B signaling pathway;ko04640//Hematopoietic cell lineage;ko04666//Fc gamma R-mediated phagocytosis;ko04664//Fc epsilon RI signaling pathway;ko04662//B cell receptor signaling pathway;ko04672//Intestinal immune network for IgA production	K06856	-	-	-
46	XLOC_029754	2.16667	107.167	0.3	15.425	5.29094	0.000241709	0.0144399	up	TCONS_00088304	> XP_014945208.1 PREDICTED: basic salivary proline-rich protein 1-like [Ovis aries musimon]	-	-	-	-	-	-	-
47	XLOC_030372	34.3333	8	0.958333	0.23	-2.06738	0.000779538	0.027257	down	TCONS_00089118	-	-	-	-	-	-	-	-
48	gene10026	32988.2	10038.8	673.655	211.1	-1.57198	4.34376e-06	0.00134795	down	SPARC	SPARC precursor [Ovis aries]	-	-	-	-	GO:0031410//cytoplasmic vesicle;GO:0012505//endomembrane system;GO:0012506//vesicle membrane;GO:0099503//secretory vesicle;GO:0043231//intracellular membrane-bounded organelle;GO:0005623//cell;GO:0097708//intracellular vesicle;GO:0031974//membrane-enclosed lumen;GO:0005622//intracellular;GO:0043226//organelle;GO:0031981//nuclear lumen;GO:0034399//nuclear periphery;GO:0044421//extracellular region…	GO:0044877//macromolecular complex binding;GO:0032403//protein complex binding;GO:0046872//metal ion binding;GO:0043169//cation binding;GO:0005515//protein binding;GO:0005488//binding;GO:0043167//ion binding	GO:0007423//sensory organ development;GO:0044707//single-multicellular organism process;GO:0048514//blood vessel morphogenesis;GO:0050789//regulation of biological process;GO:0072359//circulatory system development;GO:0032940//secretion by cell;GO:0010033//response to organic substance;GO:0002237//response to molecule of bacterial origin;GO:0048545//response to steroid hormone;GO:0065007//biologi…
49	gene10064	0	92.1667	0.001	2.28833	9.22551	0.000205148	0.0131336	up	FAM71B	PREDICTED: protein FAM71B [Ovis aries]	-	-	-	-	GO:0005623//cell;GO:0043229//intracellular organelle;GO:0043227//membrane-bounded organelle;GO:0044464//cell part;GO:0043231//intracellular membrane-bounded organelle;GO:0005622//intracellular;GO:0044424//intracellular part;GO:0043226//organelle	-	-
50	gene10186	419.667	146.167	4.23167	1.48667	-1.40555	0.000349719	0.0169865	down	LYSMD3	LysM and hypothetical peptidoglycan-binding domain-containing protein 3 [Larimichthys crocea]	-	-	-	-	GO:0031224//intrinsic component of membrane;GO:0044425//membrane part;GO:0016020//membrane	-	-
51	gene10207	0	21.8333	0.001	0.321667	7.16019	0.0018886	0.0452272	up	FAM81B	PREDICTED: protein FAM81B isoform X1 [Ovis aries]	-	-	-	-	-	-	-
52	gene1022	54.6667	484.333	1.39667	12.0283	3.45541	1.48271e-06	0.000637079	up	PHGDH	PREDICTED: D-3-phosphoglycerate dehydrogenase isoform X1 [Ovis aries]	Metabolism	Amino acid metabolism;Global and Overview	ko01200//Carbon metabolism;ko01230//Biosynthesis of amino acids;ko00260//Glycine, serine and threonine metabolism	K00058	-	-	-
53	gene10234	58.8333	16.8333	0.926667	0.27	-1.71253	0.000501527	0.0212863	down	RGMB	-	-	-	-	-	-	-	-
54	gene10273	0.333333	11.6667	0.00333333	0.1	4.53618	0.00190899	0.0454703	up	TMEM232	PREDICTED: transmembrane protein 232 isoform X1 [Ovis aries]	-	-	-	-	-	-	-
55	gene103	0	75.6667	0.001	2.60833	8.94357	0.00014902	0.0110616	up	LOC105610609	PREDICTED: LOW QUALITY PROTEIN: dnaJ homolog subfamily B member 3-like [Ovis aries]	-	-	-	-	-	-	-
56	gene10395	89.3333	23	0.656667	0.168333	-1.92006	0.000649172	0.0242025	down	SGMS2	PREDICTED: phosphatidylcholine:ceramide cholinephosphotransferase 2 [Ovis aries]	Environmental Information Processing;Metabolism	Signal transduction;Lipid metabolism	ko04071//Sphingolipid signaling pathway;ko00600//Sphingolipid metabolism	K04714	-	-	-
57	gene10412	1105.17	395	4.74167	1.725	-1.40333	2.10848e-06	0.000812238	down	TET2	PREDICTED: methylcytosine dioxygenase TET2 isoform X1 [Ovis aries]	-	-	-	-	-	-	-
58	gene10470	0	46.1667	0.001	1.60667	8.232	0.000537156	0.0220214	up	PDHA2	PREDICTED: pyruvate dehydrogenase E1 component subunit alpha, testis-specific form, mitochondrial [Ovis aries]	Organismal Systems;Environmental Information Processing;Metabolism	Signal transduction;Global and Overview;Carbohydrate metabolism;Endocrine system	ko01200//Carbon metabolism;ko04922//Glucagon signaling pathway;ko04066//HIF-1 signaling pathway;ko00010//Glycolysis / Gluconeogenesis;ko00620//Pyruvate metabolism;ko00020//Citrate cycle (TCA cycle)	K00161	GO:0005623//cell;GO:0044444//cytoplasmic part;GO:0005622//intracellular;GO:0043227//membrane-bounded organelle;GO:0043229//intracellular organelle;GO:0044424//intracellular part;GO:0005737//cytoplasm;GO:0043226//organelle;GO:0044464//cell part;GO:0043231//intracellular membrane-bounded organelle	GO:0004738//pyruvate dehydrogenase activity;GO:0003824//catalytic activity;GO:0016491//oxidoreductase activity;GO:0034603//pyruvate dehydrogenase [NAD(P)+] activity;GO:0016620//oxidoreductase activity, acting on the aldehyde or oxo group of donors, NAD or NADP as acceptor;GO:0016903//oxidoreductase activity, acting on the aldehyde or oxo group of donors	GO:0006086//acetyl-CoA biosynthetic process from pyruvate;GO:0044763//single-organism cellular process;GO:0071704//organic substance metabolic process;GO:0009987//cellular process;GO:0072350//tricarboxylic acid metabolic process;GO:0008152//metabolic process;GO:0006084//acetyl-CoA metabolic process;GO:0006082//organic acid metabolic process;GO:0043436//oxoacid metabolic process;GO:0044699//single…
59	gene10498	1609.67	624.333	8.855	3.57333	-1.25133	7.66747e-05	0.00805135	down	FAM13A	PREDICTED: protein FAM13A isoform X1 [Ovis aries]	-	-	-	-	-	-	-
60	gene10623	4065.31	1637.74	28.6383	14.435	-1.21327	0.000171325	0.0120755	down	APBB2	PREDICTED: amyloid beta A4 precursor protein-binding family B member 2 isoform X1 [Ovis aries]	-	-	-	-	-	-	-
61	gene10681	0.166667	105	0.00333333	1.855	8.17822	0.000148981	0.0110616	up	SPATA18	PREDICTED: mitochondria-eating protein isoform X2 [Ovis aries musimon]	-	-	-	-	GO:0005622//intracellular;GO:0044425//membrane part;GO:0044429//mitochondrial part;GO:0031224//intrinsic component of membrane;GO:0044424//intracellular part;GO:0031966//mitochondrial membrane;GO:0043227//membrane-bounded organelle;GO:0043231//intracellular membrane-bounded organelle;GO:0044444//cytoplasmic part;GO:0043226//organelle;GO:0005737//cytoplasm;GO:0043229//intracellular organelle;GO:00…	-	GO:0000422//mitophagy;GO:0022411//cellular component disassembly;GO:0006996//organelle organization;GO:0061726//mitochondrion disassembly;GO:0051716//cellular response to stimulus;GO:1903008//organelle disassembly;GO:0044763//single-organism cellular process;GO:0050896//response to stimulus;GO:0016043//cellular component organization;GO:1902589//single-organism organelle organization;GO:0009987//…
62	gene10702	0	24.1667	0.001	1.45667	7.31076	0.00092311	0.0297145	up	PDCL2	PREDICTED: phosducin-like protein 2 isoform X2 [Ovis aries]	-	-	-	-	-	-	-
63	gene10720	0	20.5	0.001	1.27333	7.07693	0.0012673	0.0359571	up	LOC101110332	-	-	-	-	-	-	-	-
64	gene10731	1325.33	565	376.68	164.413	-1.10844	2.86617e-05	0.00456694	down	IGFBP7	PREDICTED: insulin-like growth factor-binding protein 7-like [Tursiops truncatus]	-	-	-	-	GO:1903561//extracellular vesicle;GO:0005576//extracellular region;GO:0044421//extracellular region part;GO:0043226//organelle;GO:0043227//membrane-bounded organelle;GO:0031982//vesicle;GO:0043230//extracellular organelle	GO:0005515//protein binding;GO:0019838//growth factor binding;GO:0005488//binding	GO:0044699//single-organism process;GO:0008283//cell proliferation;GO:0022610//biological adhesion
65	gene10791	0	86.5	0.001	2.58667	9.13422	0.00022283	0.0137117	up	CABS1	PREDICTED: calcium-binding and spermatid-specific protein 1 [Ovis aries]	-	-	-	-	-	-	-
66	gene10854	130.667	536.667	5.83333	26.6183	1.99651	0.000179226	0.0123214	up	CXCL9	PREDICTED: C-X-C motif chemokine 9 isoform X1 [Ovis aries]	Organismal Systems;Environmental Information Processing	Immune system;Signaling molecules and interaction	ko04060//Cytokine-cytokine receptor interaction;ko04062//Chemokine signaling pathway;ko04620//Toll-like receptor signaling pathway	K05416	-	-	-
67	gene10888	0	49.5	0.001	1.04333	8.33446	0.000262713	0.0148439	up	GK2	PREDICTED: glycerol kinase 2 [Ovis aries]	Organismal Systems;Metabolism	Lipid metabolism;Endocrine system	ko03320//PPAR signaling pathway;ko00561//Glycerolipid metabolism	K00864	-	-	-
68	gene11117	376.667	167.5	6.66667	3.08667	-1.08435	4.65316e-05	0.0064103	down	EPB41L4A	PREDICTED: band 4.1-like protein 4A isoform X3 [Ovis aries]	-	-	-	-	GO:0043229//intracellular organelle;GO:0043232//intracellular non-membrane-bounded organelle;GO:0005622//intracellular;GO:0044464//cell part;GO:0043228//non-membrane-bounded organelle;GO:0005623//cell;GO:0016020//membrane;GO:0044425//membrane part;GO:0043226//organelle;GO:0044424//intracellular part	GO:0005515//protein binding;GO:0005488//binding	-
69	gene11120	10740	2051.83	255.722	49.5467	-2.18394	4.0416e-07	0.000255101	down	NREP	PREDICTED: neuronal regeneration-related protein isoform X2 [Ovis aries]	-	-	-	-	-	-	-
70	gene1113	0	25.8333	0.001	0.855	7.40042	0.00140402	0.038041	up	LOC101119949	PREDICTED: neuroblastoma breakpoint family member 6-like protein [Ovis aries]	-	-	-	-	-	-	-
71	gene11197	0.166667	22.5	0.005	0.578333	6.03767	0.0016294	0.0414832	up	BHMT	PREDICTED: betaine--homocysteine S-methyltransferase 1 isoform X1 [Ovis aries]	Metabolism	Amino acid metabolism	ko00260//Glycine, serine and threonine metabolism;ko00270//Cysteine and methionine metabolism	K00544	-	-	-
72	gene11198	397.333	143	1.97833	0.725	-1.37176	0.00124964	0.0355224	down	JMY	PREDICTED: junction-mediating and -regulatory protein isoform X2 [Ovis aries musimon]	-	-	-	-	GO:0044464//cell part;GO:0005623//cell	GO:0008092//cytoskeletal protein binding;GO:0005488//binding;GO:0005515//protein binding	GO:0031334//positive regulation of protein complex assembly;GO:0008152//metabolic process;GO:0065007//biological regulation;GO:0006996//organelle organization;GO:0051495//positive regulation of cytoskeleton organization;GO:0050794//regulation of cellular process;GO:0016043//cellular component organization;GO:0044237//cellular metabolic process;GO:0090304//nucleic acid metabolic process;GO:0030029…
73	gene11201	823.667	363	3.41333	1.535	-1.0157	0.000958651	0.0302166	down	HOMER1	PREDICTED: homer protein homolog 1 isoform X1 [Ovis aries]	Organismal Systems;Environmental Information Processing	Nervous system;Signal transduction	ko04068//FoxO signaling pathway;ko04724//Glutamatergic synapse	K15010	-	-	-
74	gene1124	2	225.833	0.0616667	7.31833	6.48013	1.42407e-05	0.00288684	up	LOC101120207	PREDICTED: myomegalin-like [Ovis aries]	-	-	-	-	-	-	-
75	gene11267	0.333333	31.6667	0.01	0.946667	5.88661	0.00138803	0.0378204	up	LOC101106331	PREDICTED: sperm equatorial segment protein 1 isoform X1 [Ovis aries]	-	-	-	-	GO:0016023//cytoplasmic, membrane-bounded vesicle;GO:0043226//organelle;GO:0005737//cytoplasm;GO:0031988//membrane-bounded vesicle;GO:0030141//secretory granule;GO:0031982//vesicle;GO:0005622//intracellular;GO:0043231//intracellular membrane-bounded organelle;GO:0044464//cell part;GO:0097708//intracellular vesicle;GO:0005623//cell;GO:0031410//cytoplasmic vesicle;GO:0044424//intracellular part;GO:…	-	GO:0022414//reproductive process;GO:0032501//multicellular organismal process;GO:0019953//sexual reproduction;GO:0044699//single-organism process;GO:0044702//single organism reproductive process;GO:0009566//fertilization;GO:0007338//single fertilization;GO:0051704//multi-organism process;GO:0044703//multi-organism reproductive process;GO:0000003//reproduction;GO:0044707//single-multicellular orga…
76	gene11272	5	105.167	0.06	1.44833	4.11826	0.0007349	0.0262298	up	PAQR5	PREDICTED: membrane progestin receptor gamma isoform X2 [Ovis aries]	-	-	-	-	-	-	-
77	gene11315	0	86	0.001	3.42	9.12588	0.000225187	0.0137845	up	TBC1D21	PREDICTED: TBC1 domain family member 21 [Ovis aries]	-	-	-	-	-	-	-
78	gene11346	66	233.667	1.36667	4.755	2.15982	0.0011377	0.0336085	up	PCK2	PREDICTED: phosphoenolpyruvate carboxykinase [GTP], mitochondrial isoform X2 [Ovis aries musimon]	Organismal Systems;Environmental Information Processing;Metabolism	Excretory system;Signal transduction;Carbohydrate metabolism;Endocrine system	ko04151//PI3K-Akt signaling pathway;ko04910//Insulin signaling pathway;ko04068//FoxO signaling pathway;ko04152//AMPK signaling pathway;ko04922//Glucagon signaling pathway;ko04920//Adipocytokine signaling pathway;ko03320//PPAR signaling pathway;ko00010//Glycolysis / Gluconeogenesis;ko00620//Pyruvate metabolism;ko00020//Citrate cycle (TCA cycle);ko04964//Proximal tubule bicarbonate reclamation	K01596	GO:0043231//intracellular membrane-bounded organelle;GO:0005576//extracellular region;GO:0043226//organelle;GO:0044424//intracellular part;GO:0044464//cell part;GO:0031982//vesicle;GO:0043227//membrane-bounded organelle;GO:0005623//cell;GO:0043229//intracellular organelle;GO:1903561//extracellular vesicle;GO:0044421//extracellular region part;GO:0043230//extracellular organelle;GO:0005622//intrac…	GO:0016831//carboxy-lyase activity;GO:0016740//transferase activity;GO:0036094//small molecule binding;GO:0016830//carbon-carbon lyase activity;GO:0001883//purine nucleoside binding;GO:0032549//ribonucleoside binding;GO:0005488//binding;GO:0003824//catalytic activity;GO:0097367//carbohydrate derivative binding;GO:0004611//phosphoenolpyruvate carboxykinase activity;GO:1901363//heterocyclic compoun…	GO:0044238//primary metabolic process;GO:0009987//cellular process;GO:0006006//glucose metabolic process;GO:0044699//single-organism process;GO:0006793//phosphorus metabolic process;GO:0044281//small molecule metabolic process;GO:0005996//monosaccharide metabolic process;GO:0006796//phosphate-containing compound metabolic process;GO:0071704//organic substance metabolic process;GO:0044723//single-…
79	gene11354	3.66667	58.1667	0.0566667	0.925	3.74388	0.00113475	0.0336085	up	JPH4	PREDICTED: junctophilin-4 isoform X1, partial [Ovis aries]	-	-	-	-	GO:0042995//cell projection;GO:0016528//sarcoplasm;GO:0044424//intracellular part;GO:0097458//neuron part;GO:0030425//dendrite;GO:0036477//somatodendritic compartment;GO:0005623//cell;GO:0005622//intracellular;GO:0044464//cell part;GO:0043005//neuron projection;GO:0005737//cytoplasm	-	GO:0050890//cognition;GO:0065008//regulation of biological quality;GO:0007611//learning or memory;GO:0050877//neurological system process;GO:0044699//single-organism process;GO:0007610//behavior;GO:0050905//neuromuscular process;GO:0050803//regulation of synapse structure or activity;GO:0065007//biological regulation;GO:0044707//single-multicellular organism process;GO:0032501//multicellular orga…
80	gene11402	79.3333	233	2.48833	7.72833	1.5775	0.000526714	0.0218337	up	LOC101106528	T-cell receptor delta 4 [Ovis aries]	-	-	-	-	-	-	-
81	gene1144	1553.83	3300.17	42.53	92.895	1.20324	0.000831679	0.0284514	up	CA14	PREDICTED: carbonic anhydrase 14 isoform X1 [Ovis aries]	Metabolism	Energy metabolism	ko00910//Nitrogen metabolism	K01672	GO:0031224//intrinsic component of membrane;GO:0016020//membrane;GO:0044425//membrane part	-	-
82	gene11442	0.333333	69.8333	0.00333333	0.841667	7.02737	5.42014e-05	0.00673575	up	RPGRIP1	PREDICTED: X-linked retinitis pigmentosa GTPase regulator-interacting protein 1 [Ovis aries]	-	-	-	-	GO:0072372//primary cilium;GO:0043226//organelle;GO:0005929//cilium;GO:0005623//cell;GO:0005856//cytoskeleton;GO:0043232//intracellular non-membrane-bounded organelle;GO:0044424//intracellular part;GO:0005622//intracellular;GO:0031513//nonmotile primary cilium;GO:0044464//cell part;GO:0042995//cell projection;GO:0043228//non-membrane-bounded organelle;GO:0043229//intracellular organelle	-	GO:0048731//system development;GO:0030154//cell differentiation;GO:0007399//nervous system development;GO:0048592//eye morphogenesis;GO:0009987//cellular process;GO:0044699//single-organism process;GO:0001754//eye photoreceptor cell differentiation;GO:0007600//sensory perception;GO:0009653//anatomical structure morphogenesis;GO:0032502//developmental process;GO:0090596//sensory organ morphogenesi…
83	gene11451	16.6667	484.167	1.25333	49.8917	4.61784	2.82254e-05	0.00456694	up	TPPP2	PREDICTED: tubulin polymerization-promoting protein family member 2 isoform X1 [Ovis aries]	-	-	-	-	-	-	-
84	gene11457	91.6667	217.833	5.38833	13.2733	1.26572	0.000257057	0.0147646	up	LOC101112822	PREDICTED: brain ribonuclease isoform X1 [Ovis aries]	-	-	-	-	-	GO:0003824//catalytic activity;GO:0097159//organic cyclic compound binding;GO:0004518//nuclease activity;GO:0016788//hydrolase activity, acting on ester bonds;GO:0016787//hydrolase activity;GO:0005488//binding	GO:0043170//macromolecule metabolic process;GO:1901360//organic cyclic compound metabolic process;GO:0044237//cellular metabolic process;GO:0090304//nucleic acid metabolic process;GO:0046483//heterocycle metabolic process;GO:0008152//metabolic process;GO:0006725//cellular aromatic compound metabolic process;GO:0071704//organic substance metabolic process;GO:0044238//primary metabolic process;GO:0…
85	gene1147	208.333	551.333	7.18167	19.955	1.60257	0.000140355	0.0107765	up	CIART	PREDICTED: circadian-associated transcriptional repressor isoform X2 [Ovis aries]	-	-	-	-	GO:0005622//intracellular;GO:0043227//membrane-bounded organelle;GO:0043226//organelle;GO:0043231//intracellular membrane-bounded organelle;GO:0044464//cell part;GO:0044424//intracellular part;GO:0043229//intracellular organelle;GO:0005623//cell	GO:1990837//sequence-specific double-stranded DNA binding;GO:0043565//sequence-specific DNA binding;GO:0003690//double-stranded DNA binding;GO:0000976//transcription regulatory region sequence-specific DNA binding;GO:0005488//binding;GO:0003676//nucleic acid binding;GO:0000975//regulatory region DNA binding;GO:1901363//heterocyclic compound binding;GO:0097159//organic cyclic compound binding;GO:0…	GO:0006725//cellular aromatic compound metabolic process;GO:0034654//nucleobase-containing compound biosynthetic process;GO:0044238//primary metabolic process;GO:0090304//nucleic acid metabolic process;GO:0007610//behavior;GO:0016070//RNA metabolic process;GO:0006807//nitrogen compound metabolic process;GO:1901576//organic substance biosynthetic process;GO:1901360//organic cyclic compound metabol…
86	gene11629	0	33.5	0.001	1.38333	7.77221	0.00091422	0.0296035	up	TMCO5A	PREDICTED: transmembrane and coiled-coil domain-containing protein 5A isoform X1 [Ovis aries]	-	-	-	-	GO:0031224//intrinsic component of membrane;GO:0044425//membrane part;GO:0016020//membrane	-	-
87	gene11699	0	51.3333	0.001	0.658333	8.38426	0.000453718	0.0202577	up	PLA2G4F	PREDICTED: cytosolic phospholipase A2 zeta isoform X1 [Ovis aries]	Organismal Systems;Environmental Information Processing;Metabolism	Nervous system;Immune system;Signal transduction;Sensory system;Lipid metabolism;Circulatory system;Endocrine system	ko04010//MAPK signaling pathway;ko04014//Ras signaling pathway;ko04921//Oxytocin signaling pathway;ko04270//Vascular smooth muscle contraction;ko04611//Platelet activation;ko04726//Serotonergic synapse;ko04750//Inflammatory mediator regulation of TRP channels;ko04724//Glutamatergic synapse;ko00564//Glycerophospholipid metabolism;ko04912//GnRH signaling pathway;ko00590//Arachidonic acid metabolism…	K16342	GO:0042995//cell projection;GO:0005623//cell;GO:0044444//cytoplasmic part;GO:0005737//cytoplasm;GO:0005622//intracellular;GO:0044424//intracellular part;GO:0044464//cell part;GO:0043227//membrane-bounded organelle;GO:0031252//cell leading edge;GO:0001726//ruffle;GO:0043226//organelle	GO:0043167//ion binding;GO:0004623//phospholipase A2 activity;GO:0005488//binding;GO:0016788//hydrolase activity, acting on ester bonds;GO:0043169//cation binding;GO:0016787//hydrolase activity;GO:0052689//carboxylic ester hydrolase activity;GO:0004620//phospholipase activity;GO:0016298//lipase activity;GO:0003824//catalytic activity	GO:0071704//organic substance metabolic process;GO:0044699//single-organism process;GO:0044237//cellular metabolic process;GO:0044765//single-organism transport;GO:0009987//cellular process;GO:0006629//lipid metabolic process;GO:0046677//response to antibiotic;GO:0006796//phosphate-containing compound metabolic process;GO:0019637//organophosphate metabolic process;GO:0046903//secretion;GO:0044255…
88	gene1171	2	13.3333	0.06	0.4	2.73088	0.00195292	0.045979	up	ANXA9	PREDICTED: annexin A9 isoform X1 [Ovis aries]	-	-	-	-	GO:0044456//synapse part;GO:0005622//intracellular;GO:0044424//intracellular part;GO:0031982//vesicle;GO:0043230//extracellular organelle;GO:1903561//extracellular vesicle;GO:0005576//extracellular region;GO:0044421//extracellular region part;GO:0044464//cell part;GO:0043227//membrane-bounded organelle;GO:0005737//cytoplasm;GO:0044444//cytoplasmic part;GO:0005623//cell;GO:0045202//synapse;GO:0043…	GO:0004888//transmembrane signaling receptor activity;GO:0046872//metal ion binding;GO:0008289//lipid binding;GO:0038023//signaling receptor activity;GO:0005543//phospholipid binding;GO:0099600//transmembrane receptor activity;GO:0004872//receptor activity;GO:0004871//signal transducer activity;GO:0043169//cation binding;GO:0043167//ion binding;GO:0060089//molecular transducer activity;GO:0005488…	GO:0007155//cell adhesion;GO:0098916//anterograde trans-synaptic signaling;GO:0022610//biological adhesion;GO:0007267//cell-cell signaling;GO:0044699//single-organism process;GO:0099537//trans-synaptic signaling;GO:0023052//signaling;GO:0044763//single-organism cellular process;GO:0007154//cell communication;GO:0007268//chemical synaptic transmission;GO:0098602//single organism cell adhesion;GO:0…
89	gene11723	0.333333	83.9983	0.0266667	6.84667	7.20739	0.0008911	0.0292792	up	RPL10L	60S ribosomal protein L10-like [Bos taurus]	Genetic Information Processing	Translation	ko03010//Ribosome	K02866	-	-	-
90	gene1175	1.5	153	0.045	4.23833	6.26875	0.000304954	0.016082	up	C1H1orf56	PREDICTED: protein MENT isoform X1 [Ovis aries]	-	-	-	-	GO:0005623//cell;GO:0044444//cytoplasmic part;GO:0005622//intracellular;GO:0044424//intracellular part;GO:0044464//cell part;GO:0005737//cytoplasm	GO:0005488//binding;GO:0005515//protein binding	GO:0008219//cell death;GO:0050789//regulation of biological process;GO:0065007//biological regulation;GO:0008283//cell proliferation;GO:0040008//regulation of growth;GO:0009987//cellular process;GO:0044763//single-organism cellular process;GO:0012501//programmed cell death;GO:0044699//single-organism process
91	gene11766	1056.67	380.167	9.93667	3.62167	-1.3871	2.30189e-06	0.000843133	down	NID2	PREDICTED: nidogen-2 [Ovis aries]	-	-	-	-	GO:0043230//extracellular organelle;GO:0031012//extracellular matrix;GO:0044421//extracellular region part;GO:0043227//membrane-bounded organelle;GO:0031982//vesicle;GO:0005576//extracellular region;GO:0005578//proteinaceous extracellular matrix;GO:0043226//organelle;GO:1903561//extracellular vesicle	-	GO:0007155//cell adhesion;GO:0031589//cell-substrate adhesion;GO:0022610//biological adhesion
92	gene1177	125.962	478.208	3.41833	13.9567	2.31442	0.000564414	0.022722	up	LOC101111063	-	-	-	-	-	-	-	-
93	gene11821	621.833	276.833	5.115	2.30833	-1.04578	0.000166886	0.0119771	down	MYO1E	PREDICTED: unconventional myosin-Ie isoform X1 [Ovis aries]	-	-	-	-	GO:0005737//cytoplasm;GO:0070161//anchoring junction;GO:0043226//organelle;GO:0031410//cytoplasmic vesicle;GO:0016023//cytoplasmic, membrane-bounded vesicle;GO:0043229//intracellular organelle;GO:0005856//cytoskeleton;GO:0043231//intracellular membrane-bounded organelle;GO:0031988//membrane-bounded vesicle;GO:0098862//cluster of actin-based cell projections;GO:0005622//intracellular;GO:0044464//c…	GO:0001882//nucleoside binding;GO:0008092//cytoskeletal protein binding;GO:0016787//hydrolase activity;GO:0008289//lipid binding;GO:0016887//ATPase activity;GO:0005488//binding;GO:0097367//carbohydrate derivative binding;GO:0016462//pyrophosphatase activity;GO:0036094//small molecule binding;GO:0003779//actin binding;GO:0097159//organic cyclic compound binding;GO:0016818//hydrolase activity, acti…	GO:0032501//multicellular organismal process;GO:0008152//metabolic process;GO:0016192//vesicle-mediated transport;GO:0072311//glomerular epithelial cell differentiation;GO:0030855//epithelial cell differentiation;GO:0009790//embryo development;GO:0050794//regulation of cellular process;GO:0061005//cell differentiation involved in kidney development;GO:0032835//glomerulus development;GO:0072010//g…
94	gene11833	298.667	130	5.79167	2.58167	-1.11374	0.000168781	0.0119771	down	MYZAP	PREDICTED: myocardial zonula adherens protein isoform X1 [Ovis aries]	-	-	-	-	-	-	GO:0044700//single organism signaling;GO:0007165//signal transduction;GO:0065007//biological regulation;GO:0050896//response to stimulus;GO:0023052//signaling;GO:0051716//cellular response to stimulus;GO:0044699//single-organism process;GO:0050789//regulation of biological process;GO:0044763//single-organism cellular process;GO:0007154//cell communication;GO:0009987//cellular process;GO:0050794//…
95	gene11840	6.16667	31.8333	0.225	1.16167	2.35762	0.000332058	0.0166232	up	TEX9	PREDICTED: testis-expressed sequence 9 protein isoform X4 [Ovis aries]	-	-	-	-	-	-	-
96	gene11892	9	109.833	0.148333	1.785	3.35753	0.000927971	0.029747	up	USP50	PREDICTED: inactive ubiquitin carboxyl-terminal hydrolase 50 isoform X2 [Ovis aries]	-	-	-	-	-	GO:0070011//peptidase activity, acting on L-amino acid peptides;GO:0016787//hydrolase activity;GO:0003824//catalytic activity;GO:0008234//cysteine-type peptidase activity;GO:0008233//peptidase activity;GO:0019783//ubiquitin-like protein-specific protease activity	GO:0070647//protein modification by small protein conjugation or removal;GO:0006464//cellular protein modification process;GO:0036211//protein modification process;GO:0044267//cellular protein metabolic process;GO:0006508//proteolysis;GO:0070646//protein modification by small protein removal;GO:0044260//cellular macromolecule metabolic process;GO:0009987//cellular process;GO:0044237//cellular met…
97	gene11942	174	406	3.165	7.59833	1.27598	4.77647e-05	0.0064103	up	SORD	PREDICTED: sorbitol dehydrogenase [Ovis aries]	Metabolism	Carbohydrate metabolism	ko00040//Pentose and glucuronate interconversions;ko00051//Fructose and mannose metabolism	K00008	-	-	-
98	gene12066	31.8333	2.5	0.958333	0.0783333	-3.52259	2.28862e-07	0.000170449	down	LOC105607019	-	-	-	-	-	-	-	-
99	gene12071	0	134.333	0.001	3.31	9.7688	7.00716e-05	0.00764398	up	FAM71D	PREDICTED: protein FAM71D isoform X1 [Bos taurus]	-	-	-	-	-	-	-
100	gene1212	0.333333	560	0.0216667	37.1317	9.9714	1.27494e-05	0.00271794	up	OAZ3	ornithine decarboxylase antizyme 3 isoform 1 [Ovis aries]	-	-	-	-	-	GO:0098772//molecular function regulator;GO:0004857//enzyme inhibitor activity;GO:0030234//enzyme regulator activity	GO:0065009//regulation of molecular function;GO:0044092//negative regulation of molecular function;GO:0065007//biological regulation
101	gene1215	499	1162.17	8.56333	20.745	1.21255	0.000239382	0.0143777	up	RORC	PREDICTED: nuclear receptor ROR-gamma isoform X1 [Bos taurus]	Organismal Systems	Environmental adaptation	ko04710//Circadian rhythm	K08534	GO:0044446//intracellular organelle part;GO:0005622//intracellular;GO:0043226//organelle;GO:0043231//intracellular membrane-bounded organelle;GO:0043233//organelle lumen;GO:0043229//intracellular organelle;GO:0031974//membrane-enclosed lumen;GO:0043227//membrane-bounded organelle;GO:0044424//intracellular part;GO:0044428//nuclear part;GO:0044464//cell part;GO:0070013//intracellular organelle lume…	GO:0004871//signal transducer activity;GO:0008289//lipid binding;GO:0043167//ion binding;GO:0003676//nucleic acid binding;GO:0060089//molecular transducer activity;GO:0003700//transcription factor activity, sequence-specific DNA binding;GO:0001071//nucleic acid binding transcription factor activity;GO:0038023//signaling receptor activity;GO:0046914//transition metal ion binding;GO:0032934//sterol…	GO:0050794//regulation of cellular process;GO:0010467//gene expression;GO:0042221//response to chemical;GO:0009719//response to endogenous stimulus;GO:0044238//primary metabolic process;GO:0050789//regulation of biological process;GO:0044763//single-organism cellular process;GO:0050896//response to stimulus;GO:0009755//hormone-mediated signaling pathway;GO:0032774//RNA biosynthetic process;GO:000…
102	gene1218	131.333	341.667	2.28167	6.17667	1.53568	1.80936e-06	0.000721904	up	THEM4	PREDICTED: acyl-coenzyme A thioesterase THEM4 isoform X2 [Ovis aries musimon]	Environmental Information Processing	Signal transduction	ko04151//PI3K-Akt signaling pathway	K16339	GO:0016020//membrane;GO:0044444//cytoplasmic part;GO:0043226//organelle;GO:0044429//mitochondrial part;GO:0042995//cell projection;GO:0043229//intracellular organelle;GO:0005623//cell;GO:0031252//cell leading edge;GO:0031975//envelope;GO:0044464//cell part;GO:0001726//ruffle;GO:0005737//cytoplasm;GO:0005739//mitochondrion;GO:0031090//organelle membrane;GO:0043231//intracellular membrane-bounded o…	GO:0016788//hydrolase activity, acting on ester bonds;GO:0047617//acyl-CoA hydrolase activity;GO:0016787//hydrolase activity;GO:0016289//CoA hydrolase activity;GO:0003824//catalytic activity;GO:0016790//thiolester hydrolase activity	GO:0012501//programmed cell death;GO:0035336//long-chain fatty-acyl-CoA metabolic process;GO:0035383//thioester metabolic process;GO:0007154//cell communication;GO:0044238//primary metabolic process;GO:0035556//intracellular signal transduction;GO:0019752//carboxylic acid metabolic process;GO:0051716//cellular response to stimulus;GO:0008219//cell death;GO:0050896//response to stimulus;GO:0006732…
103	gene12210	934	317.167	5.38167	1.92167	-1.48671	5.23434e-08	6.15531e-05	down	VASH1	PREDICTED: vasohibin-1 [Ovis aries]	-	-	-	-	-	-	-
104	gene12212	0	16	0.001	0.246667	6.72313	0.00135609	0.0374571	up	LRRC74A	PREDICTED: leucine-rich repeat-containing protein 74A isoform X2 [Ovis aries]	-	-	-	-	-	-	-
105	gene12299	0.333333	39.6667	0.015	1.56833	6.1372	0.00136836	0.0375593	up	TRIM69	PREDICTED: E3 ubiquitin-protein ligase TRIM69 isoform X1 [Ovis aries]	-	-	-	-	GO:0043233//organelle lumen;GO:0043229//intracellular organelle;GO:0044446//intracellular organelle part;GO:0005622//intracellular;GO:0016020//membrane;GO:0005634//nucleus;GO:0005623//cell;GO:0005654//nucleoplasm;GO:0043227//membrane-bounded organelle;GO:0044428//nuclear part;GO:0070013//intracellular organelle lumen;GO:0031981//nuclear lumen;GO:0044422//organelle part;GO:0031974//membrane-enclos…	GO:0046872//metal ion binding;GO:0043169//cation binding;GO:0043167//ion binding;GO:0046914//transition metal ion binding;GO:0005488//binding	GO:0043412//macromolecule modification;GO:0044237//cellular metabolic process;GO:0006464//cellular protein modification process;GO:0036211//protein modification process;GO:0044238//primary metabolic process;GO:0071704//organic substance metabolic process;GO:0044267//cellular protein metabolic process;GO:0043170//macromolecule metabolic process;GO:0070647//protein modification by small protein con…
106	gene12423	34.505	3.66667	0.156667	0.0183333	-3.19529	0.00164196	0.0415944	down	ROS1	PREDICTED: LOW QUALITY PROTEIN: proto-oncogene tyrosine-protein kinase ROS [Ovis aries]	-	-	-	-	GO:0016020//membrane;GO:0005623//cell;GO:0044464//cell part;GO:0044425//membrane part;GO:0005737//cytoplasm;GO:0005622//intracellular;GO:0044424//intracellular part;GO:0044444//cytoplasmic part;GO:0031224//intrinsic component of membrane	GO:0003824//catalytic activity;GO:0005488//binding;GO:0019899//enzyme binding;GO:0097367//carbohydrate derivative binding;GO:0019902//phosphatase binding;GO:0036094//small molecule binding;GO:0005515//protein binding;GO:0004713//protein tyrosine kinase activity;GO:0016773//phosphotransferase activity, alcohol group as acceptor;GO:0016301//kinase activity;GO:0001883//purine nucleoside binding;GO:0…	GO:0065007//biological regulation;GO:0000003//reproduction;GO:0007276//gamete generation;GO:0043408//regulation of MAPK cascade;GO:0007166//cell surface receptor signaling pathway;GO:0010646//regulation of cell communication;GO:0035556//intracellular signal transduction;GO:0043412//macromolecule modification;GO:0006810//transport;GO:0080090//regulation of primary metabolic process;GO:0006811//ion…
107	gene12428	119.667	41	1.43667	0.498333	-1.4226	0.000823224	0.028345	down	FAM162B	PREDICTED: protein FAM162B [Ovis aries]	-	-	-	-	GO:0044425//membrane part;GO:0031224//intrinsic component of membrane;GO:0016020//membrane	-	-
108	gene12459	1596.67	673	11.495	5.01333	-1.1642	6.33653e-07	0.000337088	down	LAMA4	PREDICTED: laminin subunit alpha-4 isoform X2 [Ovis aries]	Cellular Processes;Environmental Information Processing	Cellular commiunity;Signal transduction;Signaling molecules and interaction	ko04151//PI3K-Akt signaling pathway;ko04510//Focal adhesion;ko04512//ECM-receptor interaction	K06241	GO:0005576//extracellular region;GO:0005604//basement membrane;GO:0044421//extracellular region part;GO:0005578//proteinaceous extracellular matrix;GO:0031012//extracellular matrix;GO:0044420//extracellular matrix component	GO:0005488//binding;GO:0005515//protein binding	GO:0009790//embryo development;GO:0032501//multicellular organismal process;GO:0007275//multicellular organism development;GO:0048869//cellular developmental process;GO:0030154//cell differentiation;GO:0009987//cellular process;GO:0040011//locomotion;GO:0007155//cell adhesion;GO:0044707//single-multicellular organism process;GO:0048870//cell motility;GO:0006928//movement of cell or subcellular co…
109	gene1247	0	375.667	0.001	30.39	11.2507	1.02205e-05	0.0023962	up	SMCP	PREDICTED: sperm mitochondrial-associated cysteine-rich protein [Ovis aries]	-	-	-	-	-	-	-
110	gene125	0	662.5	0.001	52.6067	12.0684	1.41131e-05	0.00288684	up	HMGB4	PREDICTED: high mobility group protein B4 isoform X1 [Ovis aries]	-	-	-	-	GO:0043228//non-membrane-bounded organelle;GO:0043231//intracellular membrane-bounded organelle;GO:0043232//intracellular non-membrane-bounded organelle;GO:0043229//intracellular organelle;GO:0044424//intracellular part;GO:0043226//organelle;GO:0043227//membrane-bounded organelle;GO:0044464//cell part;GO:0005623//cell;GO:0005622//intracellular	-	-
111	gene12590	257.173	82.995	0.708333	0.238333	-1.46486	0.000216837	0.013533	down	BACH2	PREDICTED: transcription regulator protein BACH2 isoform X3 [Ovis aries musimon]	-	-	-	-	-	-	-
112	gene126	0	55.6667	0.001	0.978333	8.50064	0.000402502	0.0188845	up	C1H1orf94	rCG31352 [Rattus norvegicus]	-	-	-	-	-	-	-
113	gene12604	2	49.5	0.0733333	1.86667	4.29647	0.00147944	0.0391589	up	SRSF12	PREDICTED: serine/arginine-rich splicing factor 12 isoform X3 [Ovis aries]	-	-	-	-	GO:0043229//intracellular organelle;GO:0005623//cell;GO:0043231//intracellular membrane-bounded organelle;GO:0044446//intracellular organelle part;GO:0044424//intracellular part;GO:0044464//cell part;GO:0031981//nuclear lumen;GO:0031974//membrane-enclosed lumen;GO:0043227//membrane-bounded organelle;GO:0043233//organelle lumen;GO:0044422//organelle part;GO:0044428//nuclear part;GO:0070013//intrac…	GO:0005515//protein binding;GO:0003676//nucleic acid binding;GO:0019904//protein domain specific binding;GO:1901363//heterocyclic compound binding;GO:0097159//organic cyclic compound binding;GO:0003723//RNA binding;GO:0005488//binding	GO:0000398//mRNA splicing, via spliceosome;GO:0043170//macromolecule metabolic process;GO:0071840//cellular component organization or biogenesis;GO:0006396//RNA processing;GO:0010467//gene expression;GO:0016071//mRNA metabolic process;GO:0034622//cellular macromolecular complex assembly;GO:0009987//cellular process;GO:0071826//ribonucleoprotein complex subunit organization;GO:0071704//organic sub…
114	gene1262	0	202.5	0.001	26.4967	10.3612	1.23037e-05	0.00269511	up	LELP1	PREDICTED: LOW QUALITY PROTEIN: late cornified envelope-like proline-rich protein 1 [Ovis aries]	-	-	-	-	-	-	-
115	gene12754	1027.33	461.33	4.43	2.04833	-1.02379	3.26143e-05	0.00489664	down	HIVEP2	PREDICTED: transcription factor HIVEP2 isoform X1 [Ovis aries]	-	-	-	-	GO:0043233//organelle lumen;GO:0043229//intracellular organelle;GO:0044424//intracellular part;GO:0005623//cell;GO:0044446//intracellular organelle part;GO:0070013//intracellular organelle lumen;GO:0031981//nuclear lumen;GO:0044422//organelle part;GO:0005634//nucleus;GO:0043226//organelle;GO:0043227//membrane-bounded organelle;GO:0031974//membrane-enclosed lumen;GO:0005622//intracellular;GO:00432…	GO:0043167//ion binding;GO:0003676//nucleic acid binding;GO:0005488//binding;GO:1901363//heterocyclic compound binding;GO:0043169//cation binding;GO:0097159//organic cyclic compound binding	GO:0009987//cellular process
116	gene12813	147.857	62	0.406667	0.176667	-1.17991	0.000528679	0.0218517	down	PLEKHG1	PREDICTED: LOW QUALITY PROTEIN: pleckstrin homology domain-containing family G member 1 isoform X1 [Ovis aries]	-	-	-	-	-	-	GO:0051716//cellular response to stimulus;GO:0009987//cellular process;GO:0065007//biological regulation;GO:0007265//Ras protein signal transduction;GO:0007266//Rho protein signal transduction;GO:0044700//single organism signaling;GO:0007264//small GTPase mediated signal transduction;GO:0050789//regulation of biological process;GO:0065009//regulation of molecular function;GO:0044699//single-organ…
117	gene12922	0.333333	24.5	0.00333333	0.215	5.53377	0.000725138	0.0259228	up	LOC105612542	PREDICTED: centromere protein J isoform X2 [Equus caballus]	-	-	-	-	-	-	-
118	gene13008	96.6667	207.5	3.375	7.575	1.22373	0.00060593	0.0235448	up	C9H8orf82	PREDICTED: UPF0598 protein C8orf82 homolog [Ovis aries]	-	-	-	-	-	-	-
119	gene13040	356.167	707.833	3.66	7.535	1.01218	8.83062e-06	0.00212153	up	OPLAH	PREDICTED: 5-oxoprolinase isoform X1 [Ovis aries]	Metabolism	Metabolism of other amino acids	ko00480//Glutathione metabolism	K01469	-	GO:0003824//catalytic activity;GO:0001883//purine nucleoside binding;GO:0016787//hydrolase activity;GO:0097367//carbohydrate derivative binding;GO:0016810//hydrolase activity, acting on carbon-nitrogen (but not peptide) bonds;GO:1901363//heterocyclic compound binding;GO:0016812//hydrolase activity, acting on carbon-nitrogen (but not peptide) bonds, in cyclic amides;GO:0005488//binding;GO:0097159/…	-
120	gene13042	0.166667	113.667	0.00166667	1.05667	8.35325	0.000254167	0.0147121	up	SPATC1	PREDICTED: speriolin isoform X2 [Ovis aries]	-	-	-	-	-	-	-
121	gene13091	34.6667	2.5	1.02	0.075	-3.74656	0.00128041	0.0360828	down	ARC	PREDICTED: LOW QUALITY PROTEIN: activity-regulated cytoskeleton-associated protein [Ovis aries]	-	-	-	-	GO:0016020//membrane	-	GO:0009987//cellular process;GO:0032501//multicellular organismal process;GO:0044767//single-organism developmental process;GO:0051179//localization;GO:0003002//regionalization;GO:0048856//anatomical structure development;GO:0051674//localization of cell;GO:0016043//cellular component organization;GO:0071840//cellular component organization or biogenesis;GO:0006928//movement of cell or subcellula…
122	gene13096	0.5	59.8333	0.005	0.435	6.34761	0.000172778	0.0121015	up	MROH5	PREDICTED: LOW QUALITY PROTEIN: maestro heat-like repeat family member 5 isoform X1 [Ovis aries]	-	-	-	-	-	-	-
123	gene13106	331.5	648.5	3.81	7.69167	1.04263	1.03846e-06	0.000504397	up	TRAPPC9	PREDICTED: trafficking protein particle complex subunit 9 isoform X5 [Ovis aries]	-	-	-	-	-	-	-
124	gene13109	7.66667	124.5	0.055	0.925	3.94586	8.65673e-05	0.00825899	up	COL22A1	PREDICTED: collagen alpha-1(XXII) chain isoform X2 [Ovis aries musimon]	Organismal Systems	Digestive system	ko04974//Protein digestion and absorption	K16630	-	-	-
125	gene13110	0	41.1667	0.001	0.31	8.06873	0.000321866	0.0164188	up	FAM135B	PREDICTED: protein FAM135B isoform X1 [Ovis aries]	-	-	-	-	-	-	-
126	gene13181	0	41.3333	0.001	2.13833	8.07715	0.000177131	0.0122527	up	ANXA13	PREDICTED: annexin A13 isoform X1 [Ovis aries]	-	-	-	-	GO:0097708//intracellular vesicle;GO:0043227//membrane-bounded organelle;GO:0043233//organelle lumen;GO:0043229//intracellular organelle;GO:0030133//transport vesicle;GO:0098857//membrane microdomain;GO:0031410//cytoplasmic vesicle;GO:0031988//membrane-bounded vesicle;GO:0005622//intracellular;GO:0005623//cell;GO:0016023//cytoplasmic, membrane-bounded vesicle;GO:0043231//intracellular membrane-bo…	GO:0005488//binding;GO:0005543//phospholipid binding;GO:0046872//metal ion binding;GO:0008289//lipid binding;GO:0043169//cation binding;GO:0043167//ion binding	GO:0032880//regulation of protein localization;GO:0051128//regulation of cellular component organization;GO:0050794//regulation of cellular process;GO:0051223//regulation of protein transport;GO:1904375//regulation of protein localization to cell periphery;GO:1903729//regulation of plasma membrane organization;GO:1903827//regulation of cellular protein localization;GO:0070201//regulation of estab…
127	gene13294	0	29	0.001	1.22667	7.56574	0.00115359	0.0338251	up	DNAJC5B	PREDICTED: dnaJ homolog subfamily C member 5B [Ovis aries]	Genetic Information Processing	Folding, sorting and degradation	ko04141//Protein processing in endoplasmic reticulum	K09525	GO:0016020//membrane;GO:0044425//membrane part;GO:0031224//intrinsic component of membrane	-	-
128	gene13309	0	21.1667	0.001	0.396667	7.11827	0.00106394	0.032211	up	PPP1R42	PREDICTED: protein phosphatase 1 regulatory subunit 42 isoform X1 [Ovis aries]	-	-	-	-	-	-	-
129	gene1331	256	102.667	8.75333	3.665	-1.22481	8.92478e-05	0.00831722	down	EFNA4	PREDICTED: ephrin-A4 [Capra hircus]	Organismal Systems;Environmental Information Processing	Signal transduction;Development	ko04151//PI3K-Akt signaling pathway;ko04014//Ras signaling pathway;ko04015//Rap1 signaling pathway;ko04360//Axon guidance	K05462	-	-	-
130	gene13315	171.833	63.6667	0.67	0.253333	-1.36373	0.000249058	0.0145673	down	PREX2	PREDICTED: phosphatidylinositol 3,4,5-trisphosphate-dependent Rac exchanger 2 protein isoform X2 [Ovis aries]	-	-	-	-	GO:0044464//cell part;GO:0016020//membrane;GO:0005623//cell	GO:0005085//guanyl-nucleotide exchange factor activity;GO:0005089//Rho guanyl-nucleotide exchange factor activity;GO:0098772//molecular function regulator;GO:0005088//Ras guanyl-nucleotide exchange factor activity;GO:0008047//enzyme activator activity;GO:0030234//enzyme regulator activity	GO:0071840//cellular component organization or biogenesis;GO:0032501//multicellular organismal process;GO:0035556//intracellular signal transduction;GO:0050794//regulation of cellular process;GO:0048731//system development;GO:0007165//signal transduction;GO:0007154//cell communication;GO:0023052//signaling;GO:0065007//biological regulation;GO:0030154//cell differentiation;GO:0031175//neuron proje…
131	gene13353	145.667	15.3333	0.873333	0.0916667	-3.08037	1.95738e-09	6.23395e-06	down	PI15	PREDICTED: peptidase inhibitor 15 [Ovis aries]	-	-	-	-	GO:0031982//vesicle;GO:0044421//extracellular region part;GO:0043227//membrane-bounded organelle;GO:0005576//extracellular region;GO:1903561//extracellular vesicle;GO:0043230//extracellular organelle;GO:0043226//organelle	GO:0098772//molecular function regulator;GO:0004857//enzyme inhibitor activity;GO:0030234//enzyme regulator activity	GO:0060255//regulation of macromolecule metabolic process;GO:0048519//negative regulation of biological process;GO:0045861//negative regulation of proteolysis;GO:0050794//regulation of cellular process;GO:0031323//regulation of cellular metabolic process;GO:0065007//biological regulation;GO:0019222//regulation of metabolic process;GO:0030162//regulation of proteolysis;GO:0032269//negative regulat…
132	gene13354	22.1667	5.16667	0.468333	0.111667	-2.00561	0.000753546	0.0266764	down	CRISPLD1	PREDICTED: cysteine-rich secretory protein LCCL domain-containing 1 isoform X1 [Ovis aries]	-	-	-	-	GO:0005576//extracellular region;GO:0031982//vesicle;GO:0043230//extracellular organelle;GO:0043227//membrane-bounded organelle;GO:0044421//extracellular region part;GO:1903561//extracellular vesicle;GO:0043226//organelle	-	GO:0048856//anatomical structure development;GO:0032502//developmental process;GO:0009653//anatomical structure morphogenesis
133	gene13392	699.667	241.833	12.3983	4.39	-1.4281	4.57699e-06	0.00134911	down	NOV	PREDICTED: protein NOV homolog [Ovis aries]	-	-	-	-	-	-	-
134	gene1340	157.5	302.5	4.82	9.60333	1.04719	0.000122784	0.00981254	up	MTX1	PREDICTED: metaxin-1 isoform X2 [Ovis aries musimon]	-	-	-	-	-	-	-
135	gene13403	0.166667	155	0.00333333	3.99833	8.79654	0.000275781	0.0151522	up	AARD	PREDICTED: alanine and arginine-rich domain-containing protein [Ovis aries]	-	-	-	-	-	-	-
136	gene13470	0	596.167	0.001	31.0967	11.9159	1.98687e-05	0.00352322	up	ODF1	PREDICTED: outer dense fiber protein 1 [Ovis aries]	-	-	-	-	GO:0031514//motile cilium;GO:0005623//cell;GO:0043226//organelle;GO:0005929//cilium;GO:0036126//sperm flagellum;GO:0044464//cell part;GO:0042995//cell projection;GO:0097223//sperm part	-	GO:0048232//male gamete generation;GO:0032501//multicellular organismal process;GO:0032504//multicellular organism reproduction;GO:0044763//single-organism cellular process;GO:0051704//multi-organism process;GO:0044707//single-multicellular organism process;GO:0019953//sexual reproduction;GO:0048869//cellular developmental process;GO:0007276//gamete generation;GO:0044702//single organism reproduc…
137	gene13629	41	6	4.5	0.656667	-2.70416	0.00219794	0.0497458	down	LOC105611734	-	-	-	-	-	-	-	-
138	gene13630	26.8333	4	0.416667	0.0633333	-2.57103	0.000435336	0.0197296	down	DEPTOR	PREDICTED: DEP domain-containing mTOR-interacting protein [Ovis aries]	-	-	-	-	GO:0005623//cell;GO:0044464//cell part	-	GO:0097190//apoptotic signaling pathway;GO:0012501//programmed cell death;GO:0031324//negative regulation of cellular metabolic process;GO:0016043//cellular component organization;GO:0050789//regulation of biological process;GO:0048519//negative regulation of biological process;GO:0051248//negative regulation of protein metabolic process;GO:0051174//regulation of phosphorus metabolic process;GO:0…
139	gene13661	8.66667	1	0.0933333	0.01	-2.8738	0.000543228	0.0221713	down	LOC101122119	PREDICTED: protocadherin-8 isoform X3 [Ovis aries musimon]	-	-	-	-	GO:0044459//plasma membrane part;GO:0043005//neuron projection;GO:0098590//plasma membrane region;GO:0097060//synaptic membrane;GO:0071944//cell periphery;GO:0044425//membrane part;GO:0016020//membrane;GO:0005886//plasma membrane;GO:0044464//cell part;GO:0045202//synapse;GO:0031224//intrinsic component of membrane;GO:0044456//synapse part;GO:0097458//neuron part;GO:0042995//cell projection;GO:000…	GO:0046872//metal ion binding;GO:0005488//binding;GO:0043169//cation binding;GO:0043167//ion binding	GO:0007155//cell adhesion;GO:0044767//single-organism developmental process;GO:0099537//trans-synaptic signaling;GO:0009653//anatomical structure morphogenesis;GO:0022610//biological adhesion;GO:0044699//single-organism process;GO:0007267//cell-cell signaling;GO:0099536//synaptic signaling;GO:0032502//developmental process;GO:0098916//anterograde trans-synaptic signaling;GO:0002009//morphogenesis…
140	gene13663	37.3333	6.33333	1.215	0.22	-2.32996	0.000871914	0.0289898	down	LECT1	PREDICTED: leukocyte cell-derived chemotaxin 1 isoform X1 [Ovis aries]	-	-	-	-	GO:0044425//membrane part;GO:0016020//membrane;GO:0044464//cell part;GO:0031224//intrinsic component of membrane;GO:0005623//cell	-	GO:0048731//system development;GO:0001525//angiogenesis;GO:0072359//circulatory system development;GO:0048869//cellular developmental process;GO:0048514//blood vessel morphogenesis;GO:0032501//multicellular organismal process;GO:0048646//anatomical structure formation involved in morphogenesis;GO:0009987//cellular process;GO:0001568//blood vessel development;GO:0044767//single-organism developmen…
141	gene13704	0	15	0.001	0.218333	6.6291	0.00201718	0.0467529	up	ERICH6B	PREDICTED: glutamate-rich protein 6B isoform X1 [Ovis aries]	-	-	-	-	-	-	-
142	gene13705	0.833333	172.833	0.0233333	5.385	7.26354	0.000851233	0.0286864	up	SPERT	PREDICTED: spermatid-associated protein isoform X3 [Ovis aries musimon]	-	-	-	-	-	-	-
143	gene13706	0	24.3333	0.001	2.215	7.31496	0.00155026	0.0402293	up	SIAH3	PREDICTED: seven in absentia homolog 3 isoform X1 [Ovis aries]	-	-	-	-	GO:0043231//intracellular membrane-bounded organelle;GO:0005623//cell;GO:0043229//intracellular organelle;GO:0044464//cell part;GO:0043226//organelle;GO:0043227//membrane-bounded organelle;GO:0044424//intracellular part;GO:0005622//intracellular	GO:0005488//binding;GO:0043169//cation binding;GO:0003824//catalytic activity;GO:0043167//ion binding	GO:0065007//biological regulation;GO:0051649//establishment of localization in cell;GO:0006464//cellular protein modification process;GO:0034613//cellular protein localization;GO:0044248//cellular catabolic process;GO:0006605//protein targeting;GO:0033036//macromolecule localization;GO:0043412//macromolecule modification;GO:1901575//organic substance catabolic process;GO:0044237//cellular metabol…
144	gene13721	110	41.3333	2.83833	1.1	-1.38379	0.000885418	0.0291783	down	LPAR6	lysophosphatidic acid receptor 6 [Ovis aries]	Environmental Information Processing	Signal transduction;Signaling molecules and interaction	ko04151//PI3K-Akt signaling pathway;ko04080//Neuroactive ligand-receptor interaction	K04273	GO:0044425//membrane part;GO:0016020//membrane;GO:0031224//intrinsic component of membrane	GO:0004871//signal transducer activity;GO:0004872//receptor activity;GO:0004888//transmembrane signaling receptor activity;GO:0038023//signaling receptor activity;GO:0099600//transmembrane receptor activity;GO:0060089//molecular transducer activity	GO:0044699//single-organism process;GO:0065007//biological regulation;GO:0050896//response to stimulus;GO:0044763//single-organism cellular process;GO:0050794//regulation of cellular process;GO:0023052//signaling;GO:0007165//signal transduction;GO:0051716//cellular response to stimulus;GO:0009987//cellular process;GO:0007154//cell communication;GO:0050789//regulation of biological process;GO:0044…
145	gene13758	2	158.333	0.0416667	3.76333	5.96066	0.000694155	0.025301	up	CCDC70	PREDICTED: coiled-coil domain-containing protein 70 isoform X1 [Ovis aries]	-	-	-	-	GO:0016020//membrane	-	-
146	gene13790	79.1667	15.1667	1.13833	0.218333	-2.28955	0.000266285	0.0149487	down	POSTN	PREDICTED: periostin isoform X1 [Ovis aries]	-	-	-	-	-	-	-
147	gene13804	72.835	24	0.588333	0.196667	-1.46958	0.00137993	0.0376917	down	DCLK1	PREDICTED: serine/threonine-protein kinase DCLK1 isoform X1 [Capra hircus]	-	-	-	-	GO:0044456//synapse part;GO:0043226//organelle;GO:0045202//synapse;GO:0044424//intracellular part;GO:0099572//postsynaptic specialization;GO:0043232//intracellular non-membrane-bounded organelle;GO:0043228//non-membrane-bounded organelle;GO:0098794//postsynapse;GO:0071944//cell periphery;GO:0005623//cell;GO:0016020//membrane;GO:0097458//neuron part;GO:0014069//postsynaptic density;GO:0043229//int…	GO:0016772//transferase activity, transferring phosphorus-containing groups;GO:0001882//nucleoside binding;GO:0001883//purine nucleoside binding;GO:0097367//carbohydrate derivative binding;GO:0004672//protein kinase activity;GO:0003824//catalytic activity;GO:0032549//ribonucleoside binding;GO:1901363//heterocyclic compound binding;GO:0016773//phosphotransferase activity, alcohol group as acceptor…	GO:0051707//response to other organism;GO:0007034//vacuolar transport;GO:0021954//central nervous system neuron development;GO:0044699//single-organism process;GO:0060322//head development;GO:0048731//system development;GO:0043412//macromolecule modification;GO:0048858//cell projection morphogenesis;GO:0016043//cellular component organization;GO:0009605//response to external stimulus;GO:0051704//…
148	gene13837	1051	241.167	13.6833	3.335	-1.86628	0.000609144	0.0235699	down	HSPH1	PREDICTED: heat shock protein 105 kDa isoform X2 [Ovis aries musimon]	Genetic Information Processing	Folding, sorting and degradation	ko04141//Protein processing in endoplasmic reticulum	K09485	GO:0070013//intracellular organelle lumen;GO:0043233//organelle lumen;GO:0044424//intracellular part;GO:0005623//cell;GO:0005576//extracellular region;GO:0043232//intracellular non-membrane-bounded organelle;GO:0031981//nuclear lumen;GO:0031982//vesicle;GO:0043231//intracellular membrane-bounded organelle;GO:0043229//intracellular organelle;GO:0015630//microtubule cytoskeleton;GO:0005622//intrace…	GO:0032549//ribonucleoside binding;GO:0005515//protein binding;GO:0005488//binding;GO:0097159//organic cyclic compound binding;GO:0032550//purine ribonucleoside binding;GO:0008092//cytoskeletal protein binding;GO:0036094//small molecule binding;GO:0001883//purine nucleoside binding;GO:0015631//tubulin binding;GO:0001882//nucleoside binding;GO:1901363//heterocyclic compound binding;GO:0097367//car…	GO:0043549//regulation of kinase activity;GO:0080090//regulation of primary metabolic process;GO:0051347//positive regulation of transferase activity;GO:0016070//RNA metabolic process;GO:0070303//negative regulation of stress-activated protein kinase signaling cascade;GO:0044700//single organism signaling;GO:0010421//hydrogen peroxide-mediated programmed cell death;GO:0006979//response to oxidati…
149	gene13881	0	24.5	0.001	0.253333	7.32471	0.00152522	0.0397644	up	LOC101115135	PREDICTED: phospholipid-transporting ATPase IB-like isoform X1 [Ovis aries]	-	-	-	-	-	-	-
150	gene13928	0	17	0.001	0.12	6.80598	0.00162268	0.0414348	up	RNF17	PREDICTED: RING finger protein 17 isoform X1 [Ovis aries]	-	-	-	-	-	GO:0005488//binding;GO:0005515//protein binding;GO:0046983//protein dimerization activity	GO:0048869//cellular developmental process;GO:0048856//anatomical structure development;GO:0051704//multi-organism process;GO:0044699//single-organism process;GO:0022412//cellular process involved in reproduction in multicellular organism;GO:0044703//multi-organism reproductive process;GO:0032504//multicellular organism reproduction;GO:0000003//reproduction;GO:0048609//multicellular organismal re…
151	gene13941	221.167	95	2.18667	0.958333	-1.15518	0.000183862	0.0124925	down	DACH1	PREDICTED: dachshund homolog 1 isoform X2 [Ovis aries]	-	-	-	-	-	-	-
152	gene13979	319	121.667	3.28333	1.29333	-1.30533	4.51894e-06	0.00134911	down	EDNRB	PREDICTED: endothelin B receptor isoform X1 [Ovis aries]	Organismal Systems;Environmental Information Processing	Signal transduction;Signaling molecules and interaction;Endocrine system	ko04080//Neuroactive ligand-receptor interaction;ko04020//Calcium signaling pathway;ko04022//cGMP - PKG signaling pathway;ko04916//Melanogenesis	K04198	GO:0044425//membrane part;GO:0016020//membrane;GO:0031224//intrinsic component of membrane	GO:0038023//signaling receptor activity;GO:0001653//peptide receptor activity;GO:0004888//transmembrane signaling receptor activity;GO:0008528//G-protein coupled peptide receptor activity;GO:0060089//molecular transducer activity;GO:0005488//binding;GO:0004872//receptor activity;GO:0099600//transmembrane receptor activity;GO:0042277//peptide binding;GO:0033218//amide binding;GO:0004930//G-protein…	GO:0016477//cell migration;GO:0014821//phasic smooth muscle contraction;GO:0031324//negative regulation of cellular metabolic process;GO:0048565//digestive tract development;GO:0050900//leukocyte migration;GO:0051179//localization;GO:0040011//locomotion;GO:0050931//pigment cell differentiation;GO:0051239//regulation of multicellular organismal process;GO:0032502//developmental process;GO:0065008/…
153	gene14029	0.333333	93.8967	0.00333333	1.02833	7.56462	4.27855e-07	0.000258367	up	LOC101107030	PREDICTED: multidrug resistance-associated protein 4-like [Ovis aries]	Organismal Systems;Environmental Information Processing	Signal transduction;Digestive system;Membrane transport	ko04024//cAMP signaling pathway;ko04976//Bile secretion;ko02010//ABC transporters	K05673	-	-	-
154	gene14070	3.5	128.667	0.0866667	3.385	4.88684	0.000426042	0.0194266	up	GPR18	PREDICTED: N-arachidonyl glycine receptor [Ovis aries]	-	-	-	-	GO:0044425//membrane part;GO:0031224//intrinsic component of membrane;GO:0016020//membrane	GO:0004888//transmembrane signaling receptor activity;GO:0060089//molecular transducer activity;GO:0099600//transmembrane receptor activity;GO:0004871//signal transducer activity;GO:0004872//receptor activity;GO:0038023//signaling receptor activity	GO:0009987//cellular process;GO:0044700//single organism signaling;GO:0051716//cellular response to stimulus;GO:0050794//regulation of cellular process;GO:0044763//single-organism cellular process;GO:0050789//regulation of biological process;GO:0065007//biological regulation;GO:0007165//signal transduction;GO:0007154//cell communication;GO:0023052//signaling;GO:0044699//single-organism process;GO…
155	gene14077	0.333333	14.1667	0.00666667	0.708333	4.76627	0.000890587	0.0292792	up	LOC105616228	-	-	-	-	-	-	-	-
156	gene14088	45.5	14.5	0.353333	0.116667	-1.5725	0.00120827	0.0346553	down	ITGBL1	PREDICTED: integrin beta-like protein 1 isoform X3 [Ovis aries musimon]	-	-	-	-	-	-	-
157	gene14096	926.852	105.167	14.3267	1.76833	-2.82602	9.35729e-05	0.00849878	down	METTL21C	PREDICTED: protein-lysine methyltransferase METTL21C [Ovis aries]	-	-	-	-	-	GO:0008276//protein methyltransferase activity;GO:0016741//transferase activity, transferring one-carbon groups;GO:0016740//transferase activity;GO:0008168//methyltransferase activity;GO:0003824//catalytic activity	GO:0044237//cellular metabolic process;GO:0043412//macromolecule modification;GO:0032259//methylation;GO:0043170//macromolecule metabolic process;GO:0008213//protein alkylation;GO:0006479//protein methylation;GO:0019538//protein metabolic process;GO:0009987//cellular process;GO:0044267//cellular protein metabolic process;GO:0044238//primary metabolic process;GO:0006464//cellular protein modificat…
158	gene14117	22280	7204.5	150.483	49.9517	-1.48521	1.40784e-06	0.000621312	down	COL4A1	PREDICTED: collagen alpha-1(IV) chain isoform X1, partial [Ovis aries]	Organismal Systems;Cellular Processes;Environmental Information Processing	Cellular commiunity;Signal transduction;Digestive system;Signaling molecules and interaction	ko04151//PI3K-Akt signaling pathway;ko04510//Focal adhesion;ko04974//Protein digestion and absorption;ko04512//ECM-receptor interaction	K06237	-	-	-
159	gene14118	6705.83	2616.33	46.18	18.3867	-1.23224	0.000159529	0.0116864	down	LOC101115805	PREDICTED: LOW QUALITY PROTEIN: collagen alpha-2(IV) chain isoform X1 [Ovis aries]	Organismal Systems;Cellular Processes;Environmental Information Processing	Cellular commiunity;Signal transduction;Digestive system;Signaling molecules and interaction	ko04151//PI3K-Akt signaling pathway;ko04510//Focal adhesion;ko04974//Protein digestion and absorption;ko04512//ECM-receptor interaction	K06237	-	-	-
160	gene1412	0.166667	18.8333	0.00333333	0.326667	5.94803	0.00186751	0.0448665	up	LOC105614159	-	-	-	-	-	-	-	-
161	gene14149	1551.17	593.833	17.2583	6.95167	-1.25057	0.000911814	0.0296035	down	TMCO3	PREDICTED: transmembrane and coiled-coil domain-containing protein 3 isoform X2 [Ovis aries musimon]	-	-	-	-	GO:0031224//intrinsic component of membrane;GO:0016020//membrane;GO:0044425//membrane part	GO:0008324//cation transmembrane transporter activity;GO:0022857//transmembrane transporter activity;GO:0015075//ion transmembrane transporter activity;GO:0022892//substrate-specific transporter activity;GO:0022891//substrate-specific transmembrane transporter activity;GO:0005215//transporter activity;GO:0015078//hydrogen ion transmembrane transporter activity;GO:0015077//monovalent inorganic cat…	GO:0015672//monovalent inorganic cation transport;GO:0009987//cellular process;GO:0006810//transport;GO:0015992//proton transport;GO:0006811//ion transport;GO:0051234//establishment of localization;GO:0044763//single-organism cellular process;GO:0044699//single-organism process;GO:0044765//single-organism transport;GO:0006818//hydrogen transport;GO:0006812//cation transport;GO:0051179//localizati…
162	gene14152	0.166667	342.167	0.01	22.9333	9.94894	5.96151e-05	0.00685266	up	LOC101121181	PREDICTED: neurogenic differentiation factor 1 [Loxodonta africana]	-	-	-	-	-	-	-
163	gene14169	0.166667	38.8333	0.00333333	0.838333	6.81631	0.00186356	0.0448197	up	KIF2B	PREDICTED: kinesin-like protein KIF2B [Ovis aries]	-	-	-	-	-	-	-
164	gene14231	0.166667	33.1667	0.00333333	0.638333	6.55627	0.00153996	0.0400552	up	MPO	PREDICTED: myeloperoxidase isoform X2 [Ovis aries]	Cellular Processes	Transport and catabolism	ko04145//Phagosome	K10789	GO:0005764//lysosome;GO:0005766//primary lysosome;GO:0005622//intracellular;GO:0031982//vesicle;GO:0043229//intracellular organelle;GO:1903561//extracellular vesicle;GO:0005737//cytoplasm;GO:0005773//vacuole;GO:0043230//extracellular organelle;GO:0044464//cell part;GO:0043231//intracellular membrane-bounded organelle;GO:0043227//membrane-bounded organelle;GO:0044421//extracellular region part;GO:…	GO:1901363//heterocyclic compound binding;GO:0046906//tetrapyrrole binding;GO:0016209//antioxidant activity;GO:0097367//carbohydrate derivative binding;GO:0005539//glycosaminoglycan binding;GO:0097159//organic cyclic compound binding;GO:0005488//binding	GO:0043903//regulation of symbiosis, encompassing mutualism through parasitism;GO:0008152//metabolic process;GO:0006801//superoxide metabolic process;GO:0044126//regulation of growth of symbiont in host;GO:0044707//single-multicellular organism process;GO:0098754//detoxification;GO:0071825//protein-lipid complex subunit organization;GO:0009605//response to external stimulus;GO:0050896//response t…
165	gene14243	7.00833	88.3717	0.0316667	0.43	3.43188	0.000991389	0.0309297	up	PPM1E	PREDICTED: protein phosphatase 1E isoform X1 [Ovis aries]	-	-	-	-	GO:0005622//intracellular;GO:0031974//membrane-enclosed lumen;GO:0044424//intracellular part;GO:0044446//intracellular organelle part;GO:0044464//cell part;GO:0043229//intracellular organelle;GO:0043226//organelle;GO:0043227//membrane-bounded organelle;GO:0005634//nucleus;GO:0005623//cell;GO:0043231//intracellular membrane-bounded organelle;GO:0070013//intracellular organelle lumen;GO:0044422//or…	GO:0043167//ion binding;GO:0003824//catalytic activity;GO:0016787//hydrolase activity;GO:0016788//hydrolase activity, acting on ester bonds;GO:0005488//binding;GO:0004721//phosphoprotein phosphatase activity;GO:0016791//phosphatase activity;GO:0043169//cation binding;GO:0042578//phosphoric ester hydrolase activity	GO:0009892//negative regulation of metabolic process;GO:0048523//negative regulation of cellular process;GO:0051130//positive regulation of cellular component organization;GO:0065007//biological regulation;GO:0010638//positive regulation of organelle organization;GO:0050789//regulation of biological process;GO:0010563//negative regulation of phosphorus metabolic process;GO:0071704//organic substa…
166	gene14280	0	56.5	0.001	3.175	8.52198	0.000394678	0.0186433	up	C11H17orf64	PREDICTED: chromodomain-helicase-DNA-binding protein 1-like isoform X2 [Sus scrofa]	-	-	-	-	-	-	-
167	gene14314	41.5	170	6.99	29.8483	2.02758	0.000494873	0.0212225	up	LOC100101238	regakine 1-like protein precursor [Ovis aries]	-	-	-	-	GO:0044421//extracellular region part;GO:0005576//extracellular region	GO:0005125//cytokine activity;GO:0005515//protein binding;GO:0005102//receptor binding;GO:0005488//binding	GO:0050896//response to stimulus;GO:0042221//response to chemical;GO:0009605//response to external stimulus;GO:0042330//taxis;GO:0040011//locomotion;GO:0006935//chemotaxis;GO:0002376//immune system process
168	gene14318	86.1667	273.667	5.37667	17.735	1.62663	0.00165268	0.0416771	up	CCL5	PREDICTED: C-C motif chemokine 5 isoform X1 [Ovis aries]	Organismal Systems;Environmental Information Processing	Signal transduction;Immune system;Signaling molecules and interaction	ko04060//Cytokine-cytokine receptor interaction;ko04062//Chemokine signaling pathway;ko04668//TNF signaling pathway;ko04620//Toll-like receptor signaling pathway;ko04623//Cytosolic DNA-sensing pathway;ko04621//NOD-like receptor signaling pathway	K12499	-	-	-
169	gene14337	0.333333	119.333	0.005	1.81333	7.78686	0.000276851	0.0151522	up	FNDC8	PREDICTED: fibronectin type III domain-containing protein 8 isoform X1 [Ovis aries]	-	-	-	-	-	-	-
170	gene14342	1.16667	24.5	0.0333333	0.685	3.9793	0.00185695	0.0447139	up	CCT6B	PREDICTED: T-complex protein 1 subunit zeta-2 isoform X1 [Ovis aries]	-	-	-	-	GO:0032991//macromolecular complex;GO:0005623//cell;GO:0044424//intracellular part;GO:0043234//protein complex;GO:0044464//cell part;GO:0005622//intracellular	GO:0097367//carbohydrate derivative binding;GO:0005488//binding;GO:1901363//heterocyclic compound binding;GO:0001883//purine nucleoside binding;GO:0036094//small molecule binding;GO:0097159//organic cyclic compound binding;GO:0032550//purine ribonucleoside binding;GO:0001882//nucleoside binding;GO:0005515//protein binding;GO:0032549//ribonucleoside binding	GO:0009987//cellular process;GO:0006810//transport;GO:0051179//localization;GO:0051234//establishment of localization
171	gene14347	46	5	5.31833	0.605	-3.00046	0.000347964	0.0169772	down	LOC101119832	PREDICTED: eotaxin [Ovis aries]	Organismal Systems;Environmental Information Processing	Immune system;Signaling molecules and interaction	ko04060//Cytokine-cytokine receptor interaction;ko04062//Chemokine signaling pathway	K16597	-	-	-
172	gene14353	0	47.6667	0.001	5.89667	8.27788	0.000510904	0.0214577	up	SPACA3	sperm lysozyme like protein 1 precursor [Capra hircus]	-	-	-	-	-	-	-
173	gene14456	1.66667	263.167	0.133333	21.6567	6.92112	0.000135674	0.0105255	up	LOC101113864	diazepam-binding inhibitor-like 5 [Bos taurus]	-	-	-	-	GO:0044464//cell part;GO:0005623//cell;GO:0044424//intracellular part;GO:0005622//intracellular	GO:0005488//binding	GO:0051234//establishment of localization;GO:0051179//localization
174	gene14462	0	33.6667	0.001	1.54	7.78044	0.00046969	0.0205502	up	C11H17orf97	PREDICTED: protein LIAT1 isoform X1 [Ovis aries]	-	-	-	-	-	-	-
175	gene14537	474.333	1462.83	4.44833	14.53	1.85544	1.34847e-06	0.000621312	up	P2RX5	PREDICTED: P2X purinoceptor 5 isoform X1 [Ovis aries]	Environmental Information Processing	Signal transduction;Signaling molecules and interaction	ko04080//Neuroactive ligand-receptor interaction;ko04020//Calcium signaling pathway	K05219	-	-	-
176	gene14555	0.666667	110.667	0.00833333	1.49667	6.90715	0.00032099	0.0164188	up	TEKT1	PREDICTED: tektin-1 [Ovis aries]	-	-	-	-	-	-	-
177	gene14593	262	696.5	6.58833	18.5483	1.36194	0.000107134	0.00903495	up	INCA1	PREDICTED: protein INCA1 isoform X1 [Ovis aries]	-	-	-	-	-	-	-
178	gene14605	11.8333	80.8333	1.07	6.81667	2.57612	0.001213	0.0347016	up	C11H17orf107	rCG32768, isoform CRA_a [Rattus norvegicus]	-	-	-	-	-	-	-
179	gene14642	23	839.667	0.826667	31.9133	4.97701	1.25729e-07	0.000122138	up	YBX2	PREDICTED: Y-box-binding protein 2 isoform X2 [Ovis aries musimon]	-	-	-	-	GO:0044424//intracellular part;GO:0005634//nucleus;GO:0070013//intracellular organelle lumen;GO:1990904//ribonucleoprotein complex;GO:0043233//organelle lumen;GO:0032991//macromolecular complex;GO:0043227//membrane-bounded organelle;GO:0031974//membrane-enclosed lumen;GO:0005623//cell;GO:0043231//intracellular membrane-bounded organelle;GO:0005622//intracellular;GO:0043229//intracellular organell…	GO:0044822//poly(A) RNA binding;GO:0003729//mRNA binding;GO:0044877//macromolecular complex binding;GO:0097159//organic cyclic compound binding;GO:0005488//binding;GO:0003676//nucleic acid binding;GO:0003723//RNA binding;GO:1901363//heterocyclic compound binding	GO:0019222//regulation of metabolic process;GO:0044271//cellular nitrogen compound biosynthetic process;GO:0034654//nucleobase-containing compound biosynthetic process;GO:0032504//multicellular organism reproduction;GO:0034641//cellular nitrogen compound metabolic process;GO:0006139//nucleobase-containing compound metabolic process;GO:0000003//reproduction;GO:0044699//single-organism process;GO:0…
180	gene14654	24	429.333	0.503333	9.38833	3.90511	0.000238954	0.0143777	up	SPEM1	PREDICTED: spermatid maturation protein 1 [Capra hircus]	-	-	-	-	GO:0031224//intrinsic component of membrane;GO:0016020//membrane;GO:0044425//membrane part	-	GO:0048870//cell motility;GO:0044703//multi-organism reproductive process;GO:0048232//male gamete generation;GO:0032502//developmental process;GO:0051179//localization;GO:0019953//sexual reproduction;GO:0007276//gamete generation;GO:0006928//movement of cell or subcellular component;GO:0009987//cellular process;GO:0032504//multicellular organism reproduction;GO:0040011//locomotion;GO:0044707//sin…
181	gene14655	0.166667	246.167	0.00333333	3.70833	9.46619	4.7913e-05	0.0064103	up	C11H17orf74	Neuroligin-2 [Tupaia chinensis]	-	-	-	-	-	-	-
182	gene14656	0	25.6667	0.001	0.51	7.39265	0.000747983	0.0265826	up	LOC105607823	PREDICTED: spermatid maturation protein 1 isoform X1 [Ovis aries]	-	-	-	-	-	-	-
183	gene14661	0.666667	35.8333	0.00833333	0.548333	5.29173	0.000231398	0.014082	up	SLC35G6	PREDICTED: solute carrier family 35 member G6 [Ovis aries]	-	-	-	-	GO:0031224//intrinsic component of membrane;GO:0016020//membrane;GO:0044425//membrane part	-	-
184	gene14725	0.333333	12.3333	0.00666667	0.271667	4.56573	0.00170121	0.0421938	up	ODF4	PREDICTED: outer dense fiber protein 4 [Ovis aries]	-	-	-	-	GO:0044464//cell part;GO:0005623//cell;GO:0044425//membrane part;GO:0005929//cilium;GO:0043226//organelle;GO:0016020//membrane;GO:0042995//cell projection;GO:0031224//intrinsic component of membrane	-	GO:0044702//single organism reproductive process;GO:0048869//cellular developmental process;GO:0032504//multicellular organism reproduction;GO:0044699//single-organism process;GO:0048232//male gamete generation;GO:0032502//developmental process;GO:0044707//single-multicellular organism process;GO:0022414//reproductive process;GO:0019953//sexual reproduction;GO:0007276//gamete generation;GO:004476…
185	gene14777	2.83333	43.8333	0.0866667	1.38667	3.66971	0.00135032	0.0374321	up	TEKT3	PREDICTED: tektin-3 [Ovis aries]	-	-	-	-	-	-	-
186	gene14778	1.16667	57.3333	0.0116667	0.651667	5.22863	0.000567384	0.0227595	up	CDRT4	PREDICTED: CMT1A duplicated region transcript 4 protein isoform X1 [Ovis aries]	-	-	-	-	-	-	-
187	gene14829	102.667	254.833	2.10333	5.54833	1.27464	0.00132269	0.0369349	up	DRC3	PREDICTED: leucine-rich repeat-containing protein 48 [Ovis aries]	-	-	-	-	-	-	-
188	gene14871	409.167	920.167	5.79167	13.4083	1.15643	7.01345e-05	0.00764398	up	SPATA20	PREDICTED: spermatogenesis-associated protein 20 isoform X4 [Ovis aries musimon]	-	-	-	-	-	-	-
189	gene14946	2.16667	57.1667	0.0333333	0.878333	4.35569	0.00104155	0.0317976	up	LRRC46	PREDICTED: leucine-rich repeat-containing protein 46 isoform X1 [Ovis aries]	-	-	-	-	-	-	GO:0006886//intracellular protein transport;GO:0006605//protein targeting;GO:0015031//protein transport;GO:0051179//localization;GO:0051234//establishment of localization;GO:0006810//transport;GO:0072655//establishment of protein localization to mitochondrion;GO:0006626//protein targeting to mitochondrion;GO:0007005//mitochondrion organization;GO:0051649//establishment of localization in cell;GO:…
190	gene14977	0	70.1667	0.001	6.89667	8.83327	0.000293852	0.0157447	up	C11H17orf98	chromosome 17 open reading frame 98 [Macaca mulatta]	-	-	-	-	-	-	-
191	gene15021	301.833	649	7.62167	17.5483	1.18941	0.00137304	0.0375955	up	NR1D1	nuclear receptor subfamily 1 group D member 1 [Ovis aries]	Organismal Systems	Environmental adaptation	ko04710//Circadian rhythm	K03728	-	-	-
192	gene15093	1.16667	104.333	0.02	1.90833	6.06841	8.08631e-05	0.00815437	up	KLHL10	PREDICTED: kelch-like protein 10 [Ovis aries]	-	-	-	-	-	-	-
193	gene15104	1	236.833	0.035	8.67667	7.4383	8.97126e-05	0.00831722	up	HSPB9	PREDICTED: heat shock protein beta-9 [Ovis aries]	-	-	-	-	GO:0043229//intracellular organelle;GO:0044464//cell part;GO:0043226//organelle;GO:0005622//intracellular;GO:0043227//membrane-bounded organelle;GO:0043231//intracellular membrane-bounded organelle;GO:0005623//cell;GO:0044424//intracellular part	-	-
194	gene15123	612.84	1191.23	17.7267	35.8717	1.07058	1.36766e-05	0.00282942	up	LOC101103906	PREDICTED: tubulin gamma-1 chain isoform X1 [Ovis aries]	-	-	-	-	GO:0000228//nuclear chromosome;GO:0044424//intracellular part;GO:0005634//nucleus;GO:0031974//membrane-enclosed lumen;GO:0043231//intracellular membrane-bounded organelle;GO:0005819//spindle;GO:0005694//chromosome;GO:0044422//organelle part;GO:0043232//intracellular non-membrane-bounded organelle;GO:0005773//vacuole;GO:0005622//intracellular;GO:0015630//microtubule cytoskeleton;GO:0005929//cilium…	GO:0003824//catalytic activity;GO:0036094//small molecule binding;GO:0097367//carbohydrate derivative binding;GO:0017111//nucleoside-triphosphatase activity;GO:0016462//pyrophosphatase activity;GO:0032549//ribonucleoside binding;GO:1901363//heterocyclic compound binding;GO:0005488//binding;GO:0001883//purine nucleoside binding;GO:0016818//hydrolase activity, acting on acid anhydrides, in phosphor…	GO:0007049//cell cycle;GO:0000278//mitotic cell cycle;GO:0071840//cellular component organization or biogenesis;GO:0000226//microtubule cytoskeleton organization;GO:0007051//spindle organization;GO:0016043//cellular component organization;GO:0044763//single-organism cellular process;GO:1902589//single-organism organelle organization;GO:0006996//organelle organization;GO:0044699//single-organism p…
195	gene15159	0	30.1217	0.001	2.18333	7.62832	0.000317639	0.0164073	up	LOC101109547	PREDICTED: glutenin, low molecular weight subunit-like [Capra hircus]	-	-	-	-	-	-	-
196	gene15169	0.333333	45.3333	0.00333333	2.725	6.34958	0.00148669	0.0391822	up	C11H17orf105	chromosome 17 open reading frame 105 [Macaca mulatta]	-	-	-	-	-	-	-
197	gene15220	0	41.5	0.001	1.385	8.08199	0.000352393	0.0170792	up	LOC105611052	PREDICTED: EF-hand calcium-binding domain-containing protein 3-like isoform X1 [Ovis aries]	-	-	-	-	-	-	-
198	gene15221	0.333333	89.3333	0.00333333	0.848333	7.27408	0.000285657	0.0154165	up	SPATA32	PREDICTED: spermatogenesis-associated protein 32 [Ovis aries]	-	-	-	-	-	-	-
199	gene15225	0	116.667	0.001	1.45	9.56593	8.37862e-05	0.00821928	up	LOC101120000	PREDICTED: leucine-rich repeat-containing protein 37A-like isoform X1 [Ovis aries]	-	-	-	-	-	-	-
200	gene15227	0	30.5	0.001	0.745	7.64236	0.000627627	0.023881	up	LYZL6	PREDICTED: lysozyme-like protein 6 isoform X2 [Ovis aries]	-	-	-	-	-	GO:0003824//catalytic activity;GO:0016787//hydrolase activity	-
201	gene15233	0	56.3333	0.001	2.12833	8.51773	0.000397243	0.0186855	up	WNT3	PREDICTED: proto-oncogene Wnt-3 isoform X1 [Ovis aries]	Organismal Systems;Cellular Processes;Environmental Information Processing	Cellular commiunity;Signal transduction;Endocrine system	ko04550//Signaling pathways regulating pluripotency of stem cells;ko04390//Hippo signaling pathway;ko04310//Wnt signaling pathway;ko04916//Melanogenesis;ko04340//Hedgehog signaling pathway	K00312	-	-	-
202	gene15237	0	100.5	0.001	2.435	9.35141	0.00010288	0.0089095	up	SPPL2C	PREDICTED: signal peptide peptidase-like 2C isoform X2 [Ovis aries musimon]	-	-	-	-	GO:0031227//intrinsic component of endoplasmic reticulum membrane;GO:0042175//nuclear outer membrane-endoplasmic reticulum membrane network;GO:0044424//intracellular part;GO:0043231//intracellular membrane-bounded organelle;GO:0016020//membrane;GO:0043226//organelle;GO:0043227//membrane-bounded organelle;GO:0044432//endoplasmic reticulum part;GO:0031224//intrinsic component of membrane;GO:0044425…	GO:0005488//binding;GO:0005515//protein binding;GO:0046983//protein dimerization activity	GO:0008152//metabolic process;GO:0071704//organic substance metabolic process;GO:0044238//primary metabolic process;GO:0043170//macromolecule metabolic process;GO:0019538//protein metabolic process
203	gene15245	90.8333	26.6667	0.733333	0.226667	-1.67037	0.000329205	0.0166232	down	ITGB3	PREDICTED: integrin beta-3 isoform X2 [Ovis aries musimon]	Organismal Systems;Cellular Processes;Environmental Information Processing	Cellular commiunity;Transport and catabolism;Signaling molecules and interaction;Endocrine system;Signal transduction;Cell motility;Immune system;Development	ko04151//PI3K-Akt signaling pathway;ko04810//Regulation of actin cytoskeleton;ko04510//Focal adhesion;ko04015//Rap1 signaling pathway;ko04145//Phagosome;ko04611//Platelet activation;ko04380//Osteoclast differentiation;ko04919//Thyroid hormone signaling pathway;ko04640//Hematopoietic cell lineage;ko04512//ECM-receptor interaction	K06493	GO:0012505//endomembrane system;GO:0016020//membrane;GO:0044444//cytoplasmic part;GO:0098797//plasma membrane protein complex;GO:0031988//membrane-bounded vesicle;GO:0005902//microvillus;GO:0031410//cytoplasmic vesicle;GO:0043235//receptor complex;GO:0031982//vesicle;GO:0044433//cytoplasmic vesicle part;GO:0044446//intracellular organelle part;GO:0044422//organelle part;GO:0005887//integral compo…	GO:0005488//binding;GO:0005520//insulin-like growth factor binding;GO:0004872//receptor activity;GO:0038023//signaling receptor activity;GO:0003824//catalytic activity;GO:0016860//intramolecular oxidoreductase activity;GO:0005515//protein binding;GO:0070851//growth factor receptor binding;GO:0019899//enzyme binding;GO:0019956//chemokine binding;GO:0004871//signal transducer activity;GO:0016864//i…	GO:0050896//response to stimulus;GO:0016032//viral process;GO:0007166//cell surface receptor signaling pathway;GO:0051239//regulation of multicellular organismal process;GO:0001568//blood vessel development;GO:0007010//cytoskeleton organization;GO:0016192//vesicle-mediated transport;GO:0006996//organelle organization;GO:0009892//negative regulation of metabolic process;GO:0007596//blood coagulati…
204	gene15259	0.333333	119.833	0.00333333	1.39	7.80731	8.592e-05	0.00824897	up	2019-03-10	PREDICTED: probable E3 ubiquitin-protein ligase MARCH10 isoform X1 [Ovis aries]	-	-	-	-	-	GO:0043167//ion binding;GO:0005488//binding;GO:0043169//cation binding	-
205	gene15336	1624.17	3988.33	41.5533	107.26	1.44029	2.51545e-05	0.00419424	up	SLC16A3	PREDICTED: monocarboxylate transporter 4 isoform X1 [Ovis aries]	-	-	-	-	-	-	-
206	gene15502	660	1347	24.0433	51.28	1.08965	1.4182e-06	0.000621312	up	MIF4GD	PREDICTED: MIF4G domain-containing protein isoform X1 [Ovis aries]	-	-	-	-	-	-	-
207	gene15511	3.83333	86.8333	0.09	2.12167	4.22047	0.00147134	0.0391589	up	LOC101122710	PREDICTED: LOW QUALITY PROTEIN: E3 ubiquitin/ISG15 ligase TRIM25-like isoform X1 [Ovis aries]	-	-	-	-	-	GO:0046914//transition metal ion binding;GO:0046872//metal ion binding;GO:0043169//cation binding;GO:0043167//ion binding;GO:0005488//binding	-
208	gene15587	780.667	60.8333	19.66	1.62667	-3.35768	4.33944e-09	8.81418e-06	down	SLC16A6	PREDICTED: LOW QUALITY PROTEIN: monocarboxylate transporter 7 [Ovis aries]	-	-	-	-	GO:0031224//intrinsic component of membrane;GO:0044425//membrane part;GO:0016020//membrane	-	GO:0009987//cellular process;GO:0044699//single-organism process;GO:0044763//single-organism cellular process
209	gene15645	244.333	104.667	4.04167	1.785	-1.10159	0.00019433	0.0127274	down	LRRN2	PREDICTED: leucine-rich repeat neuronal protein 2 [Ovis aries musimon]	-	-	-	-	GO:0031224//intrinsic component of membrane;GO:0044425//membrane part;GO:0016020//membrane	-	GO:0022610//biological adhesion;GO:0007154//cell communication;GO:0044763//single-organism cellular process;GO:0044699//single-organism process;GO:0009987//cellular process
210	gene15656	0.166667	136.333	0.00833333	7.17667	8.54649	0.000193837	0.0127274	up	LEMD1	PREDICTED: LEM domain-containing protein 1 isoform X2 [Ovis aries]	-	-	-	-	GO:0016020//membrane	-	-
211	gene15658	220.81	76.6667	2.34333	0.85	-1.47899	1.09018e-05	0.00246038	down	MFSD4	PREDICTED: major facilitator superfamily domain-containing protein 4 [Ovis aries]	-	-	-	-	-	-	-
212	gene157	8.5	141.833	0.263333	4.51667	3.76536	0.00162675	0.0414832	up	TEKT2	PREDICTED: tektin-2 [Ovis aries]	-	-	-	-	-	-	-
213	gene15748	0	37.6667	0.001	2.38333	7.94017	0.000748354	0.0265826	up	LOC105610012	-	-	-	-	-	-	-	-
214	gene15790	0	115.167	0.001	2.5	9.54654	6.95116e-05	0.00764398	up	CCDC185	PREDICTED: coiled-coil domain-containing protein 185 [Ovis aries]	-	-	-	-	-	-	-
215	gene15843	0	262.667	0.001	26.605	10.7339	6.59363e-05	0.00744048	up	LOC101115386	PREDICTED: histone H3.3C-like [Ovis aries]	-	-	-	-	-	-	-
216	gene1588	488.667	180.5	7.88167	3.025	-1.25547	0.000358663	0.0172707	down	OLFML2B	PREDICTED: olfactomedin-like protein 2B isoform X1 [Ovis aries]	-	-	-	-	-	GO:0005488//binding	GO:0071840//cellular component organization or biogenesis;GO:0044763//single-organism cellular process;GO:0016043//cellular component organization;GO:0044699//single-organism process;GO:0043062//extracellular structure organization;GO:0009987//cellular process
217	gene15894	98	23	1.83667	0.441667	-1.89737	0.00116856	0.0340405	down	LOC105606487	-	-	-	-	-	-	-	-
218	gene1591	1.66667	68.6667	0.0333333	1.46333	5.0601	0.0013644	0.0375593	up	C1H1orf111	Chromosome 1 open reading frame 111 [Homo sapiens]	-	-	-	-	-	-	-
219	gene15962	53.5	203.667	2.51333	10.025	1.88773	2.87288e-06	0.00098752	up	AGTRAP	PREDICTED: type-1 angiotensin II receptor-associated protein isoform X4 [Ovis aries musimon]	-	-	-	-	GO:0005634//nucleus;GO:0044446//intracellular organelle part;GO:0005623//cell;GO:0005622//intracellular;GO:0044425//membrane part;GO:0070013//intracellular organelle lumen;GO:0016020//membrane;GO:0031224//intrinsic component of membrane;GO:0044424//intracellular part;GO:0031981//nuclear lumen;GO:0031974//membrane-enclosed lumen;GO:0043233//organelle lumen;GO:0044464//cell part;GO:0043227//membran…	-	GO:0032501//multicellular organismal process;GO:0003013//circulatory system process;GO:0007154//cell communication;GO:0044700//single organism signaling;GO:0050789//regulation of biological process;GO:0007186//G-protein coupled receptor signaling pathway;GO:0044763//single-organism cellular process;GO:0009987//cellular process;GO:0008015//blood circulation;GO:0050794//regulation of cellular proce…
220	gene16022	884.5	354.333	11.9133	4.91667	-1.21498	4.1103e-07	0.000255101	down	ERRFI1	PREDICTED: ERBB receptor feedback inhibitor 1 isoform X2 [Ovis aries musimon]	-	-	-	-	-	-	-
221	gene16037	533.833	250.167	4.92	2.395	-1.05044	3.01046e-05	0.00470368	down	PLEKHG5	PREDICTED: pleckstrin homology domain-containing family G member 5 isoform X4 [Ovis aries musimon]	-	-	-	-	GO:0044464//cell part;GO:0031410//cytoplasmic vesicle;GO:0005622//intracellular;GO:0031982//vesicle;GO:0043226//organelle;GO:0005737//cytoplasm;GO:0016023//cytoplasmic, membrane-bounded vesicle;GO:0043231//intracellular membrane-bounded organelle;GO:0031988//membrane-bounded vesicle;GO:0016020//membrane;GO:0005623//cell;GO:0044444//cytoplasmic part;GO:0030054//cell junction;GO:0044424//intracellu…	GO:0005088//Ras guanyl-nucleotide exchange factor activity;GO:0005085//guanyl-nucleotide exchange factor activity;GO:0098772//molecular function regulator	GO:0009987//cellular process;GO:0044763//single-organism cellular process;GO:0090130//tissue migration;GO:0044699//single-organism process;GO:0051336//regulation of hydrolase activity;GO:0006928//movement of cell or subcellular component;GO:0007265//Ras protein signal transduction;GO:0035556//intracellular signal transduction;GO:0044707//single-multicellular organism process;GO:0007165//signal tr…
222	gene16038	79.1667	21.1667	1.685	0.48	-1.91259	0.000269774	0.0150689	down	TNFRSF25	PREDICTED: tumor necrosis factor receptor superfamily member 25 isoform X1 [Ovis aries]	Environmental Information Processing	Signaling molecules and interaction	ko04060//Cytokine-cytokine receptor interaction	K05160	-	-	-
223	gene16049	0.833333	99	0.00333333	0.445	6.39378	0.000119973	0.00971217	up	CHD5	PREDICTED: chromodomain-helicase-DNA-binding protein 5 isoform X1 [Ovis aries]	-	-	-	-	GO:0005622//intracellular;GO:0043226//organelle;GO:0043227//membrane-bounded organelle;GO:0043229//intracellular organelle;GO:0005623//cell;GO:0044464//cell part;GO:0043231//intracellular membrane-bounded organelle;GO:0044424//intracellular part	GO:0017111//nucleoside-triphosphatase activity;GO:0042393//histone binding;GO:0001883//purine nucleoside binding;GO:0016787//hydrolase activity;GO:0042623//ATPase activity, coupled;GO:0005488//binding;GO:0097159//organic cyclic compound binding;GO:0032550//purine ribonucleoside binding;GO:0016818//hydrolase activity, acting on acid anhydrides, in phosphorus-containing anhydrides;GO:0016462//pyrop…	GO:0016570//histone modification;GO:0009987//cellular process;GO:0071704//organic substance metabolic process;GO:0043170//macromolecule metabolic process;GO:0060255//regulation of macromolecule metabolic process;GO:0019219//regulation of nucleobase-containing compound metabolic process;GO:0050794//regulation of cellular process;GO:0008213//protein alkylation;GO:0009889//regulation of biosynthetic…
224	gene16061	0	64.3333	0.001	0.965	8.70852	0.000329873	0.0166232	up	CCDC27	PREDICTED: coiled-coil domain-containing protein 27 isoform X1 [Ovis aries]	-	-	-	-	-	-	-
225	gene16069	0	200.167	0.001	4.23833	10.343	4.56652e-05	0.0064103	up	ACTRT2	PREDICTED: actin-related protein T2 [Ovis aries]	-	-	-	-	GO:0043226//organelle;GO:0043232//intracellular non-membrane-bounded organelle;GO:0043229//intracellular organelle;GO:0044424//intracellular part;GO:0005623//cell;GO:0044464//cell part;GO:0005622//intracellular;GO:0043228//non-membrane-bounded organelle	-	-
226	gene16090	0	38.6667	0.001	0.285	7.98208	0.000193267	0.0127274	up	CFAP74	PREDICTED: cilia- and flagella-associated protein 74 isoform X1 [Ovis aries]	-	-	-	-	-	-	-
227	gene16105	724.667	297.833	13.64	5.77333	-1.16845	1.54091e-07	0.000134921	down	VWA1	PREDICTED: von Willebrand factor A domain-containing protein 1 isoform X1 [Bubalus bubalis]	-	-	-	-	GO:0005622//intracellular;GO:0043227//membrane-bounded organelle;GO:0005576//extracellular region;GO:0031012//extracellular matrix;GO:1903561//extracellular vesicle;GO:0005623//cell;GO:0044424//intracellular part;GO:0030529//intracellular ribonucleoprotein complex;GO:1990904//ribonucleoprotein complex;GO:0043230//extracellular organelle;GO:0044464//cell part;GO:0032991//macromolecular complex;GO:…	GO:0005488//binding;GO:0005515//protein binding	GO:0044699//single-organism process;GO:0071704//organic substance metabolic process;GO:0071840//cellular component organization or biogenesis;GO:0043170//macromolecule metabolic process;GO:0043062//extracellular structure organization;GO:0016043//cellular component organization;GO:0044763//single-organism cellular process;GO:0008152//metabolic process;GO:0010467//gene expression;GO:0007610//behav…
228	gene16126	0	32.1667	0.001	0.338333	7.71405	0.000977383	0.0306595	up	TTLL10	PREDICTED: LOW QUALITY PROTEIN: inactive polyglycylase TTLL10 isoform X2 [Ovis aries musimon]	-	-	-	-	GO:0043232//intracellular non-membrane-bounded organelle;GO:0005622//intracellular;GO:0015630//microtubule cytoskeleton;GO:0044424//intracellular part;GO:0005856//cytoskeleton;GO:0043228//non-membrane-bounded organelle;GO:0005623//cell;GO:0043226//organelle;GO:0043229//intracellular organelle;GO:0042995//cell projection;GO:0044464//cell part	GO:0070735//protein-glycine ligase activity;GO:0070739//protein-glutamic acid ligase activity;GO:0016874//ligase activity;GO:0016881//acid-amino acid ligase activity;GO:0016879//ligase activity, forming carbon-nitrogen bonds;GO:0003824//catalytic activity	GO:0044238//primary metabolic process;GO:0043412//macromolecule modification;GO:0044237//cellular metabolic process;GO:0019538//protein metabolic process;GO:0008152//metabolic process;GO:0071704//organic substance metabolic process;GO:0009987//cellular process;GO:0044260//cellular macromolecule metabolic process;GO:0036211//protein modification process;GO:0044267//cellular protein metabolic proce…
229	gene16139	164.667	299.667	3.305	6.23333	1.0157	0.00149115	0.0391963	up	SAMD11	PREDICTED: LOW QUALITY PROTEIN: sterile alpha motif domain-containing protein 11 isoform X1 [Ovis aries]	-	-	-	-	-	-	-
230	gene16158	71.6667	23.8333	0.703333	0.243333	-1.54522	0.000499207	0.0212858	down	LOC105616540	PREDICTED: kazrin-like [Ovis aries]	-	-	-	-	GO:0005911//cell-cell junction;GO:0030054//cell junction	-	-
231	gene16192	0.333333	67.3333	0.00833333	1.68667	6.9642	0.00117632	0.034152	up	LOC101112996	Kelch-like protein 20 [Tupaia chinensis]	-	-	-	-	GO:0031224//intrinsic component of membrane;GO:0044425//membrane part;GO:0016020//membrane	-	-
232	gene16229	0.166667	97.1667	0.01	4.99667	8.12323	0.000247509	0.0145673	up	TEX35	PREDICTED: testis-expressed sequence 35 protein isoform X3 [Ovis aries]	-	-	-	-	GO:0005622//intracellular;GO:0043226//organelle;GO:0044424//intracellular part;GO:0043229//intracellular organelle;GO:0043227//membrane-bounded organelle;GO:0005623//cell;GO:0044464//cell part;GO:0043231//intracellular membrane-bounded organelle	-	-
233	gene16232	144.833	55.6667	1.18	0.466667	-1.26453	0.00159933	0.0410678	down	ANGPTL1	PREDICTED: angiopoietin-related protein 1 [Ovis aries]	-	-	-	-	GO:0031982//vesicle;GO:0044421//extracellular region part;GO:0005576//extracellular region;GO:0043227//membrane-bounded organelle;GO:1903561//extracellular vesicle;GO:0043226//organelle;GO:0043230//extracellular organelle	-	GO:0023052//signaling;GO:0007165//signal transduction;GO:0044763//single-organism cellular process;GO:0051716//cellular response to stimulus;GO:0044700//single organism signaling;GO:0007167//enzyme linked receptor protein signaling pathway;GO:0050789//regulation of biological process;GO:0007154//cell communication;GO:0065007//biological regulation;GO:0007166//cell surface receptor signaling pathw…
234	gene16268	54.3333	14.725	1.56833	0.445	-1.91758	0.000529103	0.0218517	down	LOC101120681	-	-	-	-	-	-	-	-
235	gene1628	0.5	71.1667	0.01	1.21833	6.57868	0.000220583	0.0136523	up	MAEL	PREDICTED: protein maelstrom homolog isoform X1 [Ovis aries]	-	-	-	-	-	-	-
236	gene16373	28.6667	7	0.17	0.0416667	-1.96496	0.000579207	0.0229048	down	SERTAD4	PREDICTED: SERTA domain-containing protein 4 isoform X1 [Ovis aries]	-	-	-	-	GO:0031224//intrinsic component of membrane;GO:0044425//membrane part;GO:0016020//membrane	-	-
237	gene16393	1024	359.667	4.01667	1.46	-1.35224	6.03357e-07	0.0003288	down	PLXNA2	PREDICTED: LOW QUALITY PROTEIN: plexin-A2 isoform X1 [Ovis aries]	Organismal Systems	Development	ko04360//Axon guidance	K06820	-	-	-
238	gene1640	1035.33	1965	15.2617	30.055	1.06555	7.85568e-05	0.00805135	up	RCSD1	PREDICTED: LOW QUALITY PROTEIN: capZ-interacting protein isoform X1 [Ovis aries]	-	-	-	-	-	-	-
239	gene16432	0.666667	18.3333	0.00666667	0.225	4.34089	0.00193397	0.0457741	up	C12H1orf106	chromosome 1 open reading frame 106 [Homo sapiens]	-	-	-	-	-	-	-
240	gene16442	2	57	0.0183333	0.508333	4.54308	0.000384973	0.0182621	up	LOC105610042	PREDICTED: alpha-1,3-mannosyl-glycoprotein 4-beta-N-acetylglucosaminyltransferase-like protein MGAT4E isoform X2 [Ovis aries musimon]	-	-	-	-	-	-	-
241	gene16482	36.5	10.1667	0.203333	0.0566667	-1.75575	0.00060974	0.0235699	down	PLCB1	PREDICTED: 1-phosphatidylinositol 4,5-bisphosphate phosphodiesterase beta-1 isoform X1 [Ovis aries]	Cellular Processes;Organismal Systems;Environmental Information Processing;Metabolism	Cellular commiunity;Nervous system;Excretory system;Sensory system;Digestive system;Circulatory system;Endocrine system;Signal transduction;Immune system;Environmental adaptation;Carbohydrate metabolism	ko04015//Rap1 signaling pathway;ko04020//Calcium signaling pathway;ko04022//cGMP - PKG signaling pathway;ko04062//Chemokine signaling pathway;ko04921//Oxytocin signaling pathway;ko04261//Adrenergic signaling in cardiomyocytes;ko04270//Vascular smooth muscle contraction;ko04310//Wnt signaling pathway;ko04611//Platelet activation;ko04728//Dopaminergic synapse;ko04071//Sphingolipid signaling pathway…	K05858	GO:0031967//organelle envelope;GO:0032991//macromolecular complex;GO:0005622//intracellular;GO:0000785//chromatin;GO:0043230//extracellular organelle;GO:0044427//chromosomal part;GO:0044464//cell part;GO:0043233//organelle lumen;GO:1903561//extracellular vesicle;GO:0016604//nuclear body;GO:0012505//endomembrane system;GO:0005635//nuclear envelope;GO:0044421//extracellular region part;GO:0031981//…	GO:0008289//lipid binding;GO:0046872//metal ion binding;GO:0016298//lipase activity;GO:0008081//phosphoric diester hydrolase activity;GO:1901981//phosphatidylinositol phosphate binding;GO:0005515//protein binding;GO:0043169//cation binding;GO:0035091//phosphatidylinositol binding;GO:0005488//binding;GO:0016788//hydrolase activity, acting on ester bonds;GO:1902936//phosphatidylinositol bisphosphat…	GO:0043087//regulation of GTPase activity;GO:0071310//cellular response to organic substance;GO:0007420//brain development;GO:0019953//sexual reproduction;GO:0046483//heterocycle metabolic process;GO:0031326//regulation of cellular biosynthetic process;GO:0044237//cellular metabolic process;GO:0034645//cellular macromolecule biosynthetic process;GO:0035556//intracellular signal transduction;GO:00…
242	gene16484	375.5	173	2.895	1.36833	-1.0574	0.000355962	0.0171776	down	PLCB4	PREDICTED: 1-phosphatidylinositol 4,5-bisphosphate phosphodiesterase beta-4 isoform X1 [Ovis aries]	Cellular Processes;Organismal Systems;Environmental Information Processing;Metabolism	Cellular commiunity;Nervous system;Excretory system;Sensory system;Digestive system;Circulatory system;Endocrine system;Signal transduction;Immune system;Environmental adaptation;Carbohydrate metabolism	ko04015//Rap1 signaling pathway;ko04020//Calcium signaling pathway;ko04022//cGMP - PKG signaling pathway;ko04062//Chemokine signaling pathway;ko04921//Oxytocin signaling pathway;ko04261//Adrenergic signaling in cardiomyocytes;ko04270//Vascular smooth muscle contraction;ko04310//Wnt signaling pathway;ko04611//Platelet activation;ko04728//Dopaminergic synapse;ko04071//Sphingolipid signaling pathway…	K05858	GO:0042995//cell projection;GO:0005783//endoplasmic reticulum;GO:0005737//cytoplasm;GO:0005623//cell;GO:0043226//organelle;GO:0043005//neuron projection;GO:0060076//excitatory synapse;GO:0043229//intracellular organelle;GO:0043231//intracellular membrane-bounded organelle;GO:0097458//neuron part;GO:0044444//cytoplasmic part;GO:0043227//membrane-bounded organelle;GO:0044424//intracellular part;GO:…	GO:0043169//cation binding;GO:0043167//ion binding;GO:0046872//metal ion binding;GO:0016787//hydrolase activity;GO:0003824//catalytic activity;GO:0005488//binding;GO:0042578//phosphoric ester hydrolase activity;GO:0016788//hydrolase activity, acting on ester bonds	GO:0044238//primary metabolic process;GO:0044763//single-organism cellular process;GO:0050896//response to stimulus;GO:0071704//organic substance metabolic process;GO:0051716//cellular response to stimulus;GO:0007154//cell communication;GO:0023052//signaling;GO:0009987//cellular process;GO:0044699//single-organism process;GO:0065007//biological regulation;GO:0044700//single organism signaling;GO:…
243	gene1652	0	24.6667	0.001	0.703333	7.33439	0.00150261	0.0392709	up	LOC101111513	PREDICTED: alpha-1,3-mannosyl-glycoprotein 4-beta-N-acetylglucosaminyltransferase C-like isoform X1 [Ovis aries]	-	-	-	-	-	-	-
244	gene16532	362.667	128	2.74667	1.01333	-1.50233	0.000103638	0.00893829	down	LOC106991516	-	-	-	-	-	-	-	-
245	gene16552	2.66667	0	0.0166667	0.001	-4.4467	0.00177438	0.0434868	down	LOC105616648	-	-	-	-	-	-	-	-
246	gene16555	793	2035.67	7.84	21.0933	1.34707	9.69532e-05	0.0086997	up	ECHDC3	PREDICTED: enoyl-CoA hydratase domain-containing protein 3, mitochondrial isoform X3 [Ovis aries musimon]	-	-	-	-	GO:0044464//cell part;GO:0043226//organelle;GO:0044424//intracellular part;GO:0043231//intracellular membrane-bounded organelle;GO:0043229//intracellular organelle;GO:0005622//intracellular;GO:0005623//cell;GO:0043227//membrane-bounded organelle	-	-
247	gene16613	0.5	52.1667	0.00833333	0.923333	6.08548	0.00120202	0.0345645	up	SPAG6	sperm-associated antigen 6 [Bos taurus]	-	-	-	-	GO:0044446//intracellular organelle part;GO:0043232//intracellular non-membrane-bounded organelle;GO:0043227//membrane-bounded organelle;GO:0005930//axoneme;GO:0044441//ciliary part;GO:0044424//intracellular part;GO:0044464//cell part;GO:0005622//intracellular;GO:0043226//organelle;GO:0044447//axoneme part;GO:0015630//microtubule cytoskeleton;GO:0005623//cell;GO:0043228//non-membrane-bounded orga…	-	GO:0032502//developmental process;GO:0048731//system development;GO:0016043//cellular component organization;GO:0040011//locomotion;GO:0022414//reproductive process;GO:0006928//movement of cell or subcellular component;GO:0060322//head development;GO:0009987//cellular process;GO:0048856//anatomical structure development;GO:0044767//single-organism developmental process;GO:0048870//cell motility;G…
248	gene1663	163.167	58.1667	0.593333	0.223333	-1.35176	0.000597219	0.0233281	down	SLC5A3	PREDICTED: sodium/myo-inositol cotransporter [Capra hircus]	-	-	-	-	-	-	-
249	gene16661	0	28	0.001	2.90667	7.51555	0.00122446	0.0349402	up	MEIG1	PREDICTED: meiosis expressed gene 1 protein homolog isoform X1 [Ovis aries]	-	-	-	-	GO:0044464//cell part;GO:0043227//membrane-bounded organelle;GO:0043231//intracellular membrane-bounded organelle;GO:0043226//organelle;GO:0044424//intracellular part;GO:0043229//intracellular organelle;GO:0005623//cell;GO:0005622//intracellular	-	-
250	gene16707	0	21.5	0.001	1.88	7.14456	0.00114965	0.0338123	up	LOC101117350	PREDICTED: lysozyme-like protein 1 [Ovis aries]	-	-	-	-	-	GO:0016787//hydrolase activity;GO:0003824//catalytic activity	-
251	gene16730	7.16667	285	0.095	4.20333	5.0511	4.74726e-05	0.0064103	up	LOC101119236	PREDICTED: sodium- and chloride-dependent glycine transporter 1 isoform X2 [Ovis aries]	-	-	-	-	-	-	-
252	gene16734	1011	476	8.20167	4.02	-1.01802	5.53071e-06	0.00148883	down	RRBP1	PREDICTED: ribosome-binding protein 1 isoform X1 [Bubalus bubalis]	Genetic Information Processing	Folding, sorting and degradation	ko04141//Protein processing in endoplasmic reticulum	K14000	GO:0012505//endomembrane system;GO:0044425//membrane part;GO:0044444//cytoplasmic part;GO:0005783//endoplasmic reticulum;GO:0016020//membrane;GO:0044446//intracellular organelle part;GO:0005622//intracellular;GO:0043231//intracellular membrane-bounded organelle;GO:0031224//intrinsic component of membrane;GO:0005737//cytoplasm;GO:0043226//organelle;GO:0005623//cell;GO:0043229//intracellular organe…	GO:0005488//binding;GO:0003676//nucleic acid binding;GO:0097159//organic cyclic compound binding;GO:0003723//RNA binding;GO:1901363//heterocyclic compound binding	GO:0001503//ossification;GO:0044707//single-multicellular organism process;GO:0044763//single-organism cellular process;GO:0007154//cell communication;GO:0051234//establishment of localization;GO:0051179//localization;GO:0044699//single-organism process;GO:0033036//macromolecule localization;GO:0008104//protein localization;GO:0009987//cellular process;GO:0032501//multicellular organismal process
253	gene16735	0	38.3333	0.001	5.61167	7.96887	0.000419254	0.0192349	up	BANF2	barrier-to-autointegration factor-like protein [Bos taurus]	-	-	-	-	GO:0044424//intracellular part;GO:0005622//intracellular;GO:0043231//intracellular membrane-bounded organelle;GO:0043227//membrane-bounded organelle;GO:0005623//cell;GO:0044464//cell part;GO:0043226//organelle;GO:0043229//intracellular organelle	-	-
254	gene16778	1046.33	451.5	25.1767	11.1867	-1.14178	0.00108293	0.0325599	down	CD93	PREDICTED: complement component C1q receptor [Capra hircus]	-	-	-	-	GO:0005737//cytoplasm;GO:0044424//intracellular part;GO:0005623//cell;GO:0016020//membrane;GO:0044425//membrane part;GO:0044464//cell part;GO:0005622//intracellular;GO:0031224//intrinsic component of membrane	GO:0001846//opsonin binding;GO:0043169//cation binding;GO:0005488//binding;GO:0043167//ion binding;GO:0005515//protein binding;GO:0046872//metal ion binding	GO:0007005//mitochondrion organization;GO:0050691//regulation of defense response to virus by host;GO:0007155//cell adhesion;GO:0071840//cellular component organization or biogenesis;GO:0050688//regulation of defense response to virus;GO:0043900//regulation of multi-organism process;GO:0016043//cellular component organization;GO:0080134//regulation of response to stress;GO:0022610//biological adh…
255	gene16788	0	95.6667	0.001	7.31833	9.28055	0.000110048	0.00920896	up	LOC101104772	PREDICTED: cystatin-13-like [Ovis aries]	-	-	-	-	-	GO:0030234//enzyme regulator activity;GO:0004857//enzyme inhibitor activity;GO:0098772//molecular function regulator	GO:0065007//biological regulation;GO:0050789//regulation of biological process;GO:0048519//negative regulation of biological process;GO:0032268//regulation of cellular protein metabolic process;GO:0031323//regulation of cellular metabolic process;GO:0009892//negative regulation of metabolic process;GO:0043086//negative regulation of catalytic activity;GO:0030162//regulation of proteolysis;GO:0032…
256	gene16790	1	146.333	0.0283333	3.92	6.75206	7.99767e-05	0.00815437	up	LOC101105017	PREDICTED: cystatin-9-like isoform X2 [Ovis aries musimon]	-	-	-	-	GO:0016020//membrane	GO:0098772//molecular function regulator;GO:0004857//enzyme inhibitor activity;GO:0030234//enzyme regulator activity	GO:0048523//negative regulation of cellular process;GO:0050794//regulation of cellular process;GO:0032269//negative regulation of cellular protein metabolic process;GO:0065009//regulation of molecular function;GO:0010466//negative regulation of peptidase activity;GO:0048519//negative regulation of biological process;GO:0019222//regulation of metabolic process;GO:0065007//biological regulation;GO:…
257	gene16819	111.178	26.47	2.5	0.616667	-1.97689	1.43418e-05	0.00288684	down	LOC101107809	PREDICTED: LOW QUALITY PROTEIN: dihydrodiol dehydrogenase 3-like [Ovis aries]	Organismal Systems;Metabolism	Endocrine system;Lipid metabolism	ko00590//Arachidonic acid metabolism;ko00140//Steroid hormone biosynthesis;ko04913//Ovarian Steroidogenesis	K04119	-	-	GO:0008152//metabolic process;GO:0044710//single-organism metabolic process;GO:0044699//single-organism process
258	gene16826	91.5567	17.7267	4.73333	0.966667	-2.24645	1.68844e-05	0.00309221	down	LOC101108071	PREDICTED: LOW QUALITY PROTEIN: prostaglandin F synthase 1-like [Ovis aries]	-	-	-	-	-	-	-
259	gene16830	1218.9	433.59	51.32	18.4767	-1.25809	0.00158948	0.0409146	down	LOC106990122	PREDICTED: dihydrodiol dehydrogenase 3-like isoform X3 [Ovis aries]	Organismal Systems;Metabolism	Endocrine system;Lipid metabolism	ko00590//Arachidonic acid metabolism;ko00140//Steroid hormone biosynthesis;ko04913//Ovarian Steroidogenesis	K04119	-	-	GO:0008152//metabolic process;GO:0044699//single-organism process;GO:0044710//single-organism metabolic process
260	gene16934	0.166667	35.5	0.01	2.265	6.61537	0.00122064	0.0348757	up	C13H20orf141	chromosome 20 open reading frame 141 [Macaca mulatta]	-	-	-	-	GO:0044425//membrane part;GO:0016020//membrane;GO:0031224//intrinsic component of membrane	-	-
261	gene16935	666	245.667	12.24	4.63	-1.33667	2.53168e-07	0.000182468	down	CPXM1	PREDICTED: probable carboxypeptidase X1 isoform X1 [Ovis aries]	-	-	-	-	-	-	-
262	gene16937	121	53.6667	2.045	0.94	-1.08515	0.00161733	0.0413456	down	EBF4	PREDICTED: transcription factor COE4 isoform X7 [Ovis aries musimon]	-	-	-	-	GO:0005622//intracellular;GO:0044464//cell part;GO:0044424//intracellular part;GO:0043231//intracellular membrane-bounded organelle;GO:0043229//intracellular organelle;GO:0005623//cell;GO:0043227//membrane-bounded organelle;GO:0043226//organelle	GO:0043169//cation binding;GO:0005515//protein binding;GO:1901363//heterocyclic compound binding;GO:0003676//nucleic acid binding;GO:0097159//organic cyclic compound binding;GO:0043167//ion binding;GO:0001071//nucleic acid binding transcription factor activity;GO:0005488//binding;GO:0003700//transcription factor activity, sequence-specific DNA binding;GO:0000981//RNA polymerase II transcription f…	GO:0009058//biosynthetic process;GO:0009059//macromolecule biosynthetic process;GO:0018130//heterocycle biosynthetic process;GO:0044249//cellular biosynthetic process;GO:0044237//cellular metabolic process;GO:0010467//gene expression;GO:0034645//cellular macromolecule biosynthetic process;GO:0006366//transcription from RNA polymerase II promoter;GO:0032501//multicellular organismal process;GO:009…
263	gene16988	0.333333	137.333	0.0133333	5.85167	7.97413	0.000184148	0.0124925	up	C13H20orf195	cDNA sequence BC051628, isoform CRA_b, partial [Mus musculus]	-	-	-	-	-	-	-
264	gene17014	3222.17	1146	11.98	4.39667	-1.42947	6.68536e-10	2.98742e-06	down	LAMA5	PREDICTED: laminin subunit alpha-5 isoform X2 [Ovis aries musimon]	Cellular Processes;Environmental Information Processing	Cellular commiunity;Signal transduction;Signaling molecules and interaction	ko04151//PI3K-Akt signaling pathway;ko04510//Focal adhesion;ko04512//ECM-receptor interaction	K06240	GO:0044424//intracellular part;GO:0005578//proteinaceous extracellular matrix;GO:0031982//vesicle;GO:0031012//extracellular matrix;GO:0043231//intracellular membrane-bounded organelle;GO:0005605//basal lamina;GO:0005604//basement membrane;GO:0044421//extracellular region part;GO:0005622//intracellular;GO:0043256//laminin complex;GO:0043234//protein complex;GO:0043229//intracellular organelle;GO:0…	GO:0005102//receptor binding;GO:0005515//protein binding;GO:0005488//binding	GO:0007165//signal transduction;GO:0022607//cellular component assembly;GO:0007154//cell communication;GO:0009888//tissue development;GO:1902580//single-organism cellular localization;GO:0071840//cellular component organization or biogenesis;GO:0044802//single-organism membrane organization;GO:0033036//macromolecule localization;GO:0032989//cellular component morphogenesis;GO:0042476//odontogenes…
265	gene17049	0	76.1667	0.001	6.14	8.95124	0.000263648	0.0148439	up	C13H20orf85	chromosome 20 open reading frame 85 [Macaca mulatta]	-	-	-	-	-	-	-
266	gene17052	8.33333	0.166667	0.545	0.00666667	-4.79549	2.11823e-05	0.00369746	down	LOC105606212	-	-	-	-	-	-	-	-
267	gene17062	0	126.333	0.001	11.6683	9.68045	7.59042e-05	0.00805135	up	LOC101118805	PREDICTED: protein FAM209A [Ovis aries]	-	-	-	-	GO:0016020//membrane;GO:0031224//intrinsic component of membrane;GO:0044425//membrane part	-	-
268	gene17140	0	23.5	0.001	1.07	7.26519	0.00164929	0.0416384	up	SUN5	PREDICTED: SUN domain-containing protein 5 [Ovis aries]	-	-	-	-	GO:0016020//membrane;GO:0044425//membrane part;GO:0031224//intrinsic component of membrane	-	-
269	gene17153	0	78.1667	0.001	4.385	8.98851	0.00025288	0.0147121	up	BPIFA3	PREDICTED: BPI fold-containing family A member 3 isoform X1 [Ovis aries]	-	-	-	-	-	-	-
270	gene17167	2.5	345.167	0.0266667	3.83667	6.78124	5.46482e-05	0.00673575	up	C13H20orf144	mCG3690, isoform CRA_b, partial [Mus musculus]	-	-	-	-	-	-	-
271	gene17177	275.665	42.635	20.6917	1.37833	-2.64654	5.09764e-05	0.00658361	down	LOC101111988	PREDICTED: agouti-signaling protein isoform X1 [Ovis aries]	Organismal Systems	Endocrine system	ko04916//Melanogenesis	K08725	-	-	-
272	gene17203	0	47.8333	0.001	1.19333	8.28289	0.000506235	0.0213411	up	C13H20orf173	LOC788133 protein [Bos taurus]	-	-	-	-	-	-	-
273	gene17217	0.666667	20.1667	0.0183333	0.563333	4.49909	0.000347965	0.0169772	up	CNBD2	PREDICTED: cyclic nucleotide-binding domain-containing protein 2 isoform X1 [Ovis aries]	-	-	-	-	-	GO:0005488//binding;GO:0097159//organic cyclic compound binding;GO:0000166//nucleotide binding;GO:0036094//small molecule binding;GO:1901265//nucleoside phosphate binding;GO:0030551//cyclic nucleotide binding;GO:1901363//heterocyclic compound binding	GO:0007276//gamete generation;GO:0000003//reproduction;GO:0044702//single organism reproductive process;GO:0044703//multi-organism reproductive process;GO:0022414//reproductive process;GO:0048232//male gamete generation;GO:0032504//multicellular organism reproduction;GO:0019953//sexual reproduction;GO:0051704//multi-organism process;GO:0048609//multicellular organismal reproductive process;GO:003…
274	gene17272	572.5	1423.67	7.53667	19.5	1.34574	0.00182017	0.0440952	up	MAFB	PREDICTED: transcription factor MafB isoform X2 [Ovis aries musimon]	-	-	-	-	GO:0043231//intracellular membrane-bounded organelle;GO:0005622//intracellular;GO:0032991//macromolecular complex;GO:0044424//intracellular part;GO:0005623//cell;GO:0043227//membrane-bounded organelle;GO:0044464//cell part;GO:0043226//organelle;GO:0043234//protein complex;GO:0043229//intracellular organelle	GO:0003677//DNA binding;GO:0097159//organic cyclic compound binding;GO:0044212//transcription regulatory region DNA binding;GO:1901363//heterocyclic compound binding;GO:0003700//transcription factor activity, sequence-specific DNA binding;GO:0001067//regulatory region nucleic acid binding;GO:1990837//sequence-specific double-stranded DNA binding;GO:0000975//regulatory region DNA binding;GO:000107…	GO:0048519//negative regulation of biological process;GO:0030097//hemopoiesis;GO:0097659//nucleic acid-templated transcription;GO:0044237//cellular metabolic process;GO:0098602//single organism cell adhesion;GO:0048568//embryonic organ development;GO:0070489//T cell aggregation;GO:0045637//regulation of myeloid cell differentiation;GO:0045595//regulation of cell differentiation;GO:0002521//leukoc…
275	gene17291	0	115.167	0.001	7.19333	9.54732	8.50032e-05	0.00824897	up	GTSF1L	PREDICTED: gametocyte-specific factor 1-like [Ovis aries]	-	-	-	-	-	-	-
276	gene17300	248.5	515.333	3.07833	6.54	1.20432	0.000627465	0.023881	up	FITM2	PREDICTED: fat storage-inducing transmembrane protein 2 [Ovis aries]	-	-	-	-	-	-	-
277	gene17343	0	48.8333	0.001	2.735	8.31259	0.000489459	0.0210713	up	LOC101114042	PREDICTED: eppin isoform X1 [Ovis aries]	-	-	-	-	GO:0005622//intracellular;GO:0044424//intracellular part;GO:0044464//cell part;GO:0005623//cell	GO:0030234//enzyme regulator activity;GO:0004857//enzyme inhibitor activity;GO:0004866//endopeptidase inhibitor activity;GO:0098772//molecular function regulator;GO:0030414//peptidase inhibitor activity;GO:0061134//peptidase regulator activity;GO:0061135//endopeptidase regulator activity	GO:0044092//negative regulation of molecular function;GO:0048519//negative regulation of biological process;GO:0050789//regulation of biological process;GO:0048523//negative regulation of cellular process;GO:0060255//regulation of macromolecule metabolic process;GO:0019222//regulation of metabolic process;GO:0051246//regulation of protein metabolic process;GO:0065009//regulation of molecular func…
278	gene17368	2.5	30.6667	0.0483333	0.62	3.45565	9.53168e-05	0.00862212	up	MMP9	PREDICTED: LOW QUALITY PROTEIN: matrix metalloproteinase-9 [Ovis aries]	Organismal Systems;Environmental Information Processing	Signal transduction;Immune system;Endocrine system	ko04670//Leukocyte transendothelial migration;ko04668//TNF signaling pathway;ko04915//Estrogen signaling pathway	K01403	GO:0031982//vesicle;GO:0044421//extracellular region part;GO:1903561//extracellular vesicle;GO:0005576//extracellular region;GO:0043226//organelle;GO:0043227//membrane-bounded organelle;GO:0031012//extracellular matrix;GO:0043230//extracellular organelle	GO:0008233//peptidase activity;GO:0016787//hydrolase activity;GO:0005488//binding;GO:0043169//cation binding;GO:0005515//protein binding;GO:0043167//ion binding;GO:0003824//catalytic activity;GO:0046914//transition metal ion binding;GO:0046872//metal ion binding;GO:0004175//endopeptidase activity;GO:0070011//peptidase activity, acting on L-amino acid peptides	GO:0007492//endoderm development;GO:0032409//regulation of transporter activity;GO:0065009//regulation of molecular function;GO:0010466//negative regulation of peptidase activity;GO:0006915//apoptotic process;GO:0032410//negative regulation of transporter activity;GO:0050794//regulation of cellular process;GO:0051346//negative regulation of hydrolase activity;GO:0051049//regulation of transport;G…
279	gene17403	678.333	1347	4.70667	9.595	1.03661	7.69215e-05	0.00805135	up	SLC9A8	PREDICTED: sodium/hydrogen exchanger 8 isoform X3 [Ovis aries]	-	-	-	-	GO:0005794//Golgi apparatus;GO:0044446//intracellular organelle part;GO:0005737//cytoplasm;GO:0043226//organelle;GO:0044444//cytoplasmic part;GO:0043227//membrane-bounded organelle;GO:0016020//membrane;GO:0043229//intracellular organelle;GO:0043231//intracellular membrane-bounded organelle;GO:0044422//organelle part;GO:0012505//endomembrane system;GO:0005622//intracellular;GO:0031224//intrinsic c…	GO:0005451//monovalent cation:proton antiporter activity;GO:0015297//antiporter activity;GO:0022857//transmembrane transporter activity;GO:0022890//inorganic cation transmembrane transporter activity;GO:0015077//monovalent inorganic cation transmembrane transporter activity;GO:0015078//hydrogen ion transmembrane transporter activity;GO:0022891//substrate-specific transmembrane transporter activit…	GO:0055067//monovalent inorganic cation homeostasis;GO:0015992//proton transport;GO:0006812//cation transport;GO:0065007//biological regulation;GO:0030641//regulation of cellular pH;GO:0050801//ion homeostasis;GO:0055080//cation homeostasis;GO:0006814//sodium ion transport;GO:0044699//single-organism process;GO:0042592//homeostatic process;GO:0048878//chemical homeostasis;GO:0009987//cellular pro…
280	gene17557	0.166667	397.167	0.00333333	7.785	10.1251	7.23608e-06	0.00187995	up	DNAAF1	PREDICTED: dynein assembly factor 1, axonemal [Ovis aries]	-	-	-	-	GO:0005623//cell;GO:0043227//membrane-bounded organelle;GO:0005856//cytoskeleton;GO:0016020//membrane;GO:0043229//intracellular organelle;GO:0043228//non-membrane-bounded organelle;GO:0044464//cell part;GO:0044424//intracellular part;GO:0042995//cell projection;GO:0043231//intracellular membrane-bounded organelle;GO:0043226//organelle;GO:0005622//intracellular;GO:0043232//intracellular non-membra…	GO:0005515//protein binding;GO:0005488//binding	GO:0009855//determination of bilateral symmetry;GO:0043933//macromolecular complex subunit organization;GO:0060271//cilium morphogenesis;GO:0007017//microtubule-based process;GO:0065007//biological regulation;GO:0009653//anatomical structure morphogenesis;GO:0032990//cell part morphogenesis;GO:0003002//regionalization;GO:0044782//cilium organization;GO:0016043//cellular component organization;GO:…
281	gene17652	909.667	404.833	7.82333	3.63833	-1.17859	0.000687044	0.0252477	down	MYLK3	PREDICTED: myosin light chain kinase 3 isoform X1 [Ovis aries]	Organismal Systems;Cellular Processes;Environmental Information Processing	Cellular commiunity;Immune system;Signal transduction;Cell motility;Digestive system;Circulatory system;Endocrine system	ko04810//Regulation of actin cytoskeleton;ko04510//Focal adhesion;ko04020//Calcium signaling pathway;ko04022//cGMP - PKG signaling pathway;ko04921//Oxytocin signaling pathway;ko04270//Vascular smooth muscle contraction;ko04611//Platelet activation;ko04971//Gastric acid secretion	K00907	GO:0044424//intracellular part;GO:0005856//cytoskeleton;GO:0043228//non-membrane-bounded organelle;GO:0005623//cell;GO:0043232//intracellular non-membrane-bounded organelle;GO:0043229//intracellular organelle;GO:0043226//organelle;GO:0044464//cell part;GO:0005622//intracellular	GO:0032549//ribonucleoside binding;GO:0016772//transferase activity, transferring phosphorus-containing groups;GO:0004674//protein serine/threonine kinase activity;GO:0003824//catalytic activity;GO:0016740//transferase activity;GO:0001883//purine nucleoside binding;GO:0032550//purine ribonucleoside binding;GO:0004672//protein kinase activity;GO:1901363//heterocyclic compound binding;GO:0001882//n…	GO:0006954//inflammatory response;GO:0030036//actin cytoskeleton organization;GO:0044699//single-organism process;GO:0048869//cellular developmental process;GO:0044085//cellular component biogenesis;GO:0006793//phosphorus metabolic process;GO:0031032//actomyosin structure organization;GO:0034097//response to cytokine;GO:0030239//myofibril assembly;GO:0070555//response to interleukin-1;GO:0050896/…
282	gene17730	449.958	2152.95	10.405	51.3567	2.37491	2.68275e-09	6.66008e-06	up	LOC101116336	PREDICTED: liver carboxylesterase-like isoform X1 [Ovis aries]	Metabolism	Xenobiotics biodegradation and metabolism	ko00983//Drug metabolism - other enzymes	K01044	-	-	-
283	gene17787	0	39.1667	0.001	1.61333	7.99615	0.000693036	0.025301	up	CCDC113	PREDICTED: coiled-coil domain-containing protein 113 isoform X1 [Ovis aries]	-	-	-	-	GO:0044424//intracellular part;GO:0043229//intracellular organelle;GO:0005813//centrosome;GO:0005815//microtubule organizing center;GO:0015630//microtubule cytoskeleton;GO:0043226//organelle;GO:0044430//cytoskeletal part;GO:0043228//non-membrane-bounded organelle;GO:0044422//organelle part;GO:0044464//cell part;GO:0032991//macromolecular complex;GO:0043232//intracellular non-membrane-bounded orga…	-	GO:0048869//cellular developmental process;GO:0010927//cellular component assembly involved in morphogenesis;GO:0009987//cellular process;GO:0032989//cellular component morphogenesis;GO:0044085//cellular component biogenesis;GO:0009653//anatomical structure morphogenesis;GO:0048646//anatomical structure formation involved in morphogenesis;GO:0071840//cellular component organization or biogenesis;…
284	gene17788	0.166667	39.6667	0.005	1.085	6.83624	0.00180941	0.0439908	up	PRSS54	PREDICTED: inactive serine protease 54 isoform X3 [Bubalus bubalis]	-	-	-	-	GO:0044464//cell part;GO:0044424//intracellular part;GO:0005622//intracellular;GO:0005623//cell	-	GO:0044238//primary metabolic process;GO:0019538//protein metabolic process;GO:0043170//macromolecule metabolic process;GO:0008152//metabolic process;GO:0071704//organic substance metabolic process
285	gene17791	297.333	111.333	4.61	1.72333	-1.37797	1.08023e-05	0.00246038	down	NDRG4	PREDICTED: protein NDRG4 isoform X2 [Ovis aries]	-	-	-	-	-	-	-
286	gene17813	0	96.1667	0.001	4.53333	9.28663	0.000196569	0.0127393	up	CMTM1	PREDICTED: CKLF-like MARVEL transmembrane domain-containing protein 1 isoform X1 [Ovis aries]	-	-	-	-	-	-	-
287	gene17814	0.5	220.667	0.025	11.4	8.24181	8.96936e-05	0.00831722	up	CMTM2	PREDICTED: CKLF-like MARVEL transmembrane domain-containing protein 2 [Ovis aries]	-	-	-	-	GO:0044425//membrane part;GO:0031224//intrinsic component of membrane;GO:0016020//membrane	-	-
288	gene17837	1230	2437.67	17.055	35.325	1.02185	8.60229e-05	0.00824897	up	NOL3	PREDICTED: LOW QUALITY PROTEIN: nucleolar protein 3 isoform X1 [Ovis aries]	-	-	-	-	GO:0005622//intracellular;GO:0005623//cell;GO:0043233//organelle lumen;GO:0044424//intracellular part;GO:0044464//cell part;GO:0044422//organelle part;GO:0043226//organelle;GO:0031974//membrane-enclosed lumen;GO:0043229//intracellular organelle;GO:0043231//intracellular membrane-bounded organelle;GO:0031981//nuclear lumen;GO:0005634//nucleus;GO:0044446//intracellular organelle part;GO:0043227//me…	GO:0061134//peptidase regulator activity;GO:0019904//protein domain specific binding;GO:0005515//protein binding;GO:0004866//endopeptidase inhibitor activity;GO:0030414//peptidase inhibitor activity;GO:0046872//metal ion binding;GO:0004869//cysteine-type endopeptidase inhibitor activity;GO:0005126//cytokine receptor binding;GO:0002020//protease binding;GO:0005488//binding;GO:0030234//enzyme regul…	GO:0007005//mitochondrion organization;GO:0042592//homeostatic process;GO:0044092//negative regulation of molecular function;GO:0060401//cytosolic calcium ion transport;GO:0097190//apoptotic signaling pathway;GO:0010951//negative regulation of endopeptidase activity;GO:0044260//cellular macromolecule metabolic process;GO:0006397//mRNA processing;GO:0043933//macromolecular complex subunit organiza…
289	gene17863	1.66667	65.1667	0.055	2.16	4.95084	0.00197619	0.0462831	up	C14H16orf86	hypothetical gene supported by BC032064; BC041612, isoform CRA_c [Homo sapiens]	-	-	-	-	-	-	-
290	gene17927	0	27.5	0.001	0.166667	7.49636	0.000793635	0.0275773	up	PMFBP1	PREDICTED: polyamine-modulated factor 1-binding protein 1 isoform X1 [Ovis aries]	-	-	-	-	-	-	-
291	gene18020	0	20.5	0.001	1.72333	7.07031	0.00210831	0.0484131	up	LOC105607569	PREDICTED: zinc finger protein 549-like isoform X1 [Ovis aries]	-	-	-	-	-	-	-
292	gene18033	0.166667	92.3333	0.00666667	4.03333	8.05077	0.000299628	0.0159395	up	LOC101123657	PREDICTED: protein FAM187B-like [Ovis aries]	-	-	-	-	-	-	-
293	gene18048	0.333333	537.833	0.0116667	20.155	9.89148	1.64927e-06	0.000682401	up	GAPDHS	PREDICTED: glyceraldehyde-3-phosphate dehydrogenase, testis-specific isoform X1 [Ovis aries]	Metabolism	Carbohydrate metabolism	ko00010//Glycolysis / Gluconeogenesis	K10705	GO:0043226//organelle;GO:0043231//intracellular membrane-bounded organelle;GO:0005623//cell;GO:0044424//intracellular part;GO:0043229//intracellular organelle;GO:0005622//intracellular;GO:0044464//cell part;GO:0043227//membrane-bounded organelle	GO:0016491//oxidoreductase activity;GO:0003824//catalytic activity;GO:1901363//heterocyclic compound binding;GO:0005488//binding;GO:0097159//organic cyclic compound binding;GO:0016903//oxidoreductase activity, acting on the aldehyde or oxo group of donors;GO:1901265//nucleoside phosphate binding;GO:0000166//nucleotide binding;GO:0036094//small molecule binding	GO:0005996//monosaccharide metabolic process;GO:0044710//single-organism metabolic process;GO:0006090//pyruvate metabolic process;GO:0009987//cellular process;GO:0044699//single-organism process;GO:0006082//organic acid metabolic process;GO:0044281//small molecule metabolic process;GO:0008152//metabolic process;GO:0005975//carbohydrate metabolic process;GO:0043436//oxoacid metabolic process;GO:00…
294	gene18052	0.666667	85.6667	0.025	3.23333	6.50113	0.00033501	0.0166336	up	LOC105607578	-	-	-	-	-	-	-	-
295	gene18144	4.66667	116.167	0.0316667	0.826667	4.33028	0.00128066	0.0360828	up	CATSPERG	PREDICTED: cation channel sperm-associated protein subunit gamma isoform X1 [Ovis aries]	-	-	-	-	GO:0034702//ion channel complex;GO:0005623//cell;GO:0042995//cell projection;GO:0005891//voltage-gated calcium channel complex;GO:0044459//plasma membrane part;GO:0071944//cell periphery;GO:0005929//cilium;GO:0016021//integral component of membrane;GO:0005886//plasma membrane;GO:0016020//membrane;GO:0034704//calcium channel complex;GO:0044425//membrane part;GO:0031224//intrinsic component of memb…	-	-
296	gene18146	0.166667	87.1667	0.00333333	1.57	7.97721	4.44047e-05	0.00633366	up	GGN	PREDICTED: gametogenetin-like isoform X1 [Ovis aries musimon]	-	-	-	-	-	-	GO:0051704//multi-organism process;GO:0000003//reproduction;GO:0019953//sexual reproduction;GO:0044703//multi-organism reproductive process;GO:0022414//reproductive process
297	gene1816	0	21.6667	0.001	0.355	7.14926	0.00192092	0.0455135	up	LOC105616630	PREDICTED: chitinase-like protein PB1E7.04c-like [Equus caballus]	-	-	-	-	-	-	-
298	gene18167	0.185	97.005	0.0233333	12.8083	8.12064	0.000205852	0.013141	up	LOC105602066	PREDICTED: CD63 antigen-like, partial [Ovis aries]	Cellular Processes	Transport and catabolism	ko04142//Lysosome	K06497	-	-	-
299	gene18196	0	61.1667	0.001	1.335	8.63598	0.000355354	0.0171776	up	LOC101117444	PREDICTED: LOW QUALITY PROTEIN: selenoprotein V isoform X1 [Ovis aries]	-	-	-	-	-	-	-
300	gene18232	435.833	1042.67	11.58	28.72	1.29749	9.56884e-06	0.00227443	up	LOC101121539	PREDICTED: cytochrome P450 2F3 isoform X1 [Ovis aries]	Metabolism	Xenobiotics biodegradation and metabolism	ko00980//Metabolism of xenobiotics by cytochrome P450	K07416	-	-	-
301	gene18281	0	25.1667	0.001	0.756667	7.36306	0.00145925	0.0390001	up	DMRTC2	PREDICTED: doublesex- and mab-3-related transcription factor C2 isoform X1 [Ovis aries]	-	-	-	-	-	-	-
302	gene18282	0	31.3333	0.001	1.78333	7.67648	0.00102025	0.0313228	up	LYPD4	PREDICTED: ly6/PLAUR domain-containing protein 4 isoform X1 [Ovis aries]	-	-	-	-	GO:0031224//intrinsic component of membrane;GO:0044425//membrane part;GO:0016020//membrane	-	-
303	gene18287	0.166667	37.3333	0.00166667	0.551667	6.69559	0.000769852	0.0270453	up	LOC105612604	PREDICTED: carcinoembryonic antigen-related cell adhesion molecule 21-like [Ovis aries musimon]	-	-	-	-	-	-	-
304	gene183	0.5	24.8333	0.005	0.19	5.1178	0.000608177	0.0235699	up	EPHA10	PREDICTED: ephrin type-A receptor 10 isoform X3 [Ovis aries musimon]	-	-	-	-	GO:0031982//vesicle;GO:0043226//organelle;GO:0016020//membrane;GO:0005886//plasma membrane;GO:0043227//membrane-bounded organelle;GO:0043230//extracellular organelle;GO:0031224//intrinsic component of membrane;GO:0071944//cell periphery;GO:0044425//membrane part;GO:0005576//extracellular region;GO:0044421//extracellular region part;GO:1903561//extracellular vesicle;GO:0044464//cell part;GO:000562…	GO:0004871//signal transducer activity;GO:0016772//transferase activity, transferring phosphorus-containing groups;GO:0032549//ribonucleoside binding;GO:0004872//receptor activity;GO:0099600//transmembrane receptor activity;GO:1901363//heterocyclic compound binding;GO:0016773//phosphotransferase activity, alcohol group as acceptor;GO:0004888//transmembrane signaling receptor activity;GO:0097367//…	GO:0007169//transmembrane receptor protein tyrosine kinase signaling pathway;GO:0050789//regulation of biological process;GO:0007166//cell surface receptor signaling pathway;GO:0019538//protein metabolic process;GO:0007165//signal transduction;GO:0044238//primary metabolic process;GO:0043170//macromolecule metabolic process;GO:0044267//cellular protein metabolic process;GO:0008152//metabolic proc…
305	gene1831	301.667	103.338	1.23333	0.435	-1.47433	6.59546e-08	7.36812e-05	down	CRYBG3	PREDICTED: very large A-kinase anchor protein isoform X1 [Ovis aries]	-	-	-	-	-	-	-
306	gene18310	2.66667	383.667	0.08	12.3467	6.88158	2.85437e-05	0.00456694	up	LOC101107814	PREDICTED: interferon-inducible GTPase 5 isoform X2 [Ovis aries musimon]	-	-	-	-	-	GO:0005488//binding;GO:0003824//catalytic activity;GO:0036094//small molecule binding	-
307	gene18331	61.8333	9.83333	1.17333	0.203333	-2.35014	0.000913689	0.0296035	down	CEACAM16	PREDICTED: carcinoembryonic antigen-related cell adhesion molecule 16 [Capra hircus]	-	-	-	-	GO:0005623//cell;GO:0097458//neuron part;GO:0032421//stereocilium bundle;GO:0098858//actin-based cell projection;GO:0098862//cluster of actin-based cell projections;GO:0044422//organelle part;GO:0044464//cell part;GO:0043226//organelle;GO:0032420//stereocilium;GO:0042995//cell projection	GO:0005515//protein binding;GO:0005488//binding	GO:0050954//sensory perception of mechanical stimulus;GO:0003008//system process;GO:0050877//neurological system process;GO:0007600//sensory perception;GO:0032501//multicellular organismal process
308	gene18435	8002.67	2256.5	604.102	177.572	-1.6873	3.46863e-09	7.74996e-06	down	SEPW1	PREDICTED: LOW QUALITY PROTEIN: selenoprotein W [Ovis aries]	-	-	-	-	-	-	GO:0098754//detoxification;GO:1990748//cellular detoxification;GO:0042221//response to chemical;GO:0009987//cellular process;GO:0009636//response to toxic substance;GO:0050896//response to stimulus
309	gene18455	5.5	131.5	0.0516667	1.20167	4.31851	0.00102365	0.0313307	up	SYNGR4	PREDICTED: synaptogyrin-4 isoform X2 [Ovis aries]	-	-	-	-	-	-	-
310	gene18464	0	34.5	0.001	1.38667	7.81435	0.000862941	0.0288633	up	SPACA4	PREDICTED: sperm acrosome membrane-associated protein 4 [Ovis aries]	-	-	-	-	-	-	-
311	gene18500	0.833333	52.15	0.01	0.63	5.55109	0.000686293	0.0252477	up	LOC101110357	PREDICTED: orphan sodium- and chloride-dependent neurotransmitter transporter NTT5-like isoform X9 [Ovis aries]	-	-	-	-	-	-	-
312	gene18506	37.1667	692.833	2.07	41.4767	3.95926	5.4219e-05	0.00673575	up	DKKL1	PREDICTED: dickkopf-like protein 1 isoform X1 [Ovis aries]	-	-	-	-	-	-	GO:0044699//single-organism process;GO:0006914//autophagy;GO:0009987//cellular process;GO:0022411//cellular component disassembly;GO:0006996//organelle organization;GO:0044767//single-organism developmental process;GO:0032502//developmental process;GO:0044763//single-organism cellular process;GO:0016043//cellular component organization;GO:0045444//fat cell differentiation;GO:0007005//mitochondrio…
313	gene18550	1223.67	2339.17	7.44833	14.7517	1.02224	0.000372196	0.0177692	up	MYH14	PREDICTED: myosin-14 isoform X1 [Ovis aries]	Cellular Processes	Cellular commiunity	ko04530//Tight junction	K10352	GO:0015629//actin cytoskeleton;GO:0042995//cell projection;GO:0005576//extracellular region;GO:0043230//extracellular organelle;GO:0043005//neuron projection;GO:0005623//cell;GO:0005622//intracellular;GO:0042641//actomyosin;GO:0043226//organelle;GO:0031982//vesicle;GO:0016459//myosin complex;GO:1903561//extracellular vesicle;GO:0044424//intracellular part;GO:0032982//myosin filament;GO:0044464//c…	GO:0016787//hydrolase activity;GO:0005515//protein binding;GO:0016887//ATPase activity;GO:0003779//actin binding;GO:0016818//hydrolase activity, acting on acid anhydrides, in phosphorus-containing anhydrides;GO:0003824//catalytic activity;GO:0016462//pyrophosphatase activity;GO:0036094//small molecule binding;GO:0032550//purine ribonucleoside binding;GO:0001882//nucleoside binding;GO:0097159//org…	GO:0014706//striated muscle tissue development;GO:0030036//actin cytoskeleton organization;GO:0007600//sensory perception;GO:0044763//single-organism cellular process;GO:0030029//actin filament-based process;GO:0006936//muscle contraction;GO:0016043//cellular component organization;GO:0007610//behavior;GO:0001508//action potential;GO:0006941//striated muscle contraction;GO:0044699//single-organis…
314	gene18560	650.667	201.5	34.9167	11.52	-1.51937	0.000106807	0.00903495	down	LOC105612077	-	-	-	-	-	-	-	-
315	gene18565	0	21	0.001	0.711667	7.10467	0.00203805	0.0470414	up	C14H19orf81	mCG134545, isoform CRA_c, partial [Mus musculus]	-	-	-	-	-	-	-
316	gene18570	0	60	0.001	43.9983	8.60831	0.000364588	0.0174807	up	LOC105612083	-	-	-	-	-	-	-	-
317	gene18574	0	36.8333	0.001	0.775	7.91046	0.000198032	0.0127511	up	LOC101119845	TPA: OSJNBa0006B20.10-like [Bos taurus]	-	-	-	-	-	-	-
318	gene18603	54.3333	148.833	2.045	5.76833	1.4695	0.00185716	0.0447139	up	NKG7	PREDICTED: protein NKG7 isoform X1 [Ovis aries]	-	-	-	-	GO:0016020//membrane;GO:0031224//intrinsic component of membrane;GO:0044425//membrane part	-	-
319	gene18697	15.8333	0.833333	1.12333	0.055	-4.0244	0.000235473	0.0142194	down	LOC105601998	-	-	-	-	-	-	-	-
320	gene18700	37.1667	7.66667	1.64833	0.366667	-2.0692	0.000847286	0.0286396	down	CACNG7	voltage-dependent calcium channel gamma-7 subunit [Homo sapiens]	Organismal Systems;Environmental Information Processing	Signal transduction;Circulatory system;Endocrine system	ko04010//MAPK signaling pathway;ko04921//Oxytocin signaling pathway;ko04261//Adrenergic signaling in cardiomyocytes;ko04260//Cardiac muscle contraction	K04872	-	-	-
321	gene18726	0.5	76.3333	0.0133333	2.13	6.63753	0.000481639	0.0209427	up	TMEM190	PREDICTED: transmembrane protein 190 isoform X3 [Ovis aries musimon]	-	-	-	-	GO:0043227//membrane-bounded organelle;GO:0043226//organelle;GO:0005623//cell;GO:0005622//intracellular;GO:0044424//intracellular part;GO:0044425//membrane part;GO:0043229//intracellular organelle;GO:0043231//intracellular membrane-bounded organelle;GO:0044464//cell part;GO:0016020//membrane;GO:0031224//intrinsic component of membrane	GO:0005488//binding;GO:0005515//protein binding	GO:0048513//animal organ development;GO:0002376//immune system process;GO:0048534//hematopoietic or lymphoid organ development;GO:0002520//immune system development;GO:0048731//system development;GO:0007275//multicellular organism development;GO:0032501//multicellular organismal process;GO:0044699//single-organism process;GO:0044767//single-organism developmental process;GO:0048856//anatomical st…
322	gene18727	0	34.8333	0.001	0.526667	7.82951	0.00042848	0.019498	up	FAM71E2	PREDICTED: protein FAM71E2 isoform X1 [Ovis aries]	-	-	-	-	-	-	-
323	gene18728	0.333333	101.667	0.0983333	32.5717	7.5338	0.000260435	0.0148439	up	LOC101121036	cytochrome c oxidase subunit 6B2 [Bos taurus]	Organismal Systems;Metabolism	Energy metabolism;Circulatory system	ko00190//Oxidative phosphorylation;ko04260//Cardiac muscle contraction	K02267	GO:0044424//intracellular part;GO:0005743//mitochondrial inner membrane;GO:0019866//organelle inner membrane;GO:0005739//mitochondrion;GO:0044464//cell part;GO:0043227//membrane-bounded organelle;GO:0043229//intracellular organelle;GO:0044422//organelle part;GO:0031975//envelope;GO:0031090//organelle membrane;GO:0016020//membrane;GO:0044429//mitochondrial part;GO:0043231//intracellular membrane-b…	GO:0009055//electron carrier activity	GO:0051234//establishment of localization;GO:0006810//transport;GO:0006811//ion transport;GO:0006818//hydrogen transport;GO:1902578//single-organism localization;GO:0044765//single-organism transport;GO:0051179//localization;GO:0015992//proton transport;GO:0044699//single-organism process;GO:0015672//monovalent inorganic cation transport;GO:0006812//cation transport
324	gene1881	262.833	125.5	1.935	0.948333	-1.01193	0.000870922	0.0289898	down	ABI3BP	PREDICTED: target of Nesh-SH3 isoform X1 [Ovis aries]	-	-	-	-	GO:0044421//extracellular region part;GO:0031012//extracellular matrix;GO:0005578//proteinaceous extracellular matrix;GO:0005576//extracellular region	GO:0097367//carbohydrate derivative binding;GO:0005488//binding;GO:0005539//glycosaminoglycan binding	GO:0044763//single-organism cellular process;GO:0071840//cellular component organization or biogenesis;GO:0065007//biological regulation;GO:0010810//regulation of cell-substrate adhesion;GO:0043062//extracellular structure organization;GO:0044699//single-organism process;GO:0016043//cellular component organization;GO:0030155//regulation of cell adhesion;GO:0009987//cellular process;GO:0050789//re…
325	gene18812	17.055	2.09167	0.94	0.116667	-3.07178	0.000826314	0.0283599	down	LOC101108414	PREDICTED: histone-lysine N-methyltransferase 2B-like isoform X1 [Ovis aries musimon]	-	-	-	-	-	-	-
326	gene18820	5.16667	0.166667	0.528333	0.02	-4.14294	0.00049768	0.0212613	down	LOC106990132	PREDICTED: LOW QUALITY PROTEIN: ubiquitin carboxyl-terminal hydrolase 29 [Ovis aries]	-	-	-	-	-	-	-
327	gene18821	9	0.833333	0.308333	0.0316667	-3.27698	0.000273569	0.0151296	down	LOC105602023	PREDICTED: LOW QUALITY PROTEIN: ubiquitin specific peptidase 29 [Capra hircus]	-	-	-	-	-	-	-
328	gene19	502.333	186.167	2.265	0.868333	-1.38394	3.91866e-06	0.00125078	down	SNED1	PREDICTED: LOW QUALITY PROTEIN: sushi, nidogen and EGF-like domain-containing protein 1 isoform X1, partial [Ovis aries]	-	-	-	-	-	-	-
329	gene19064	3	33.3333	0.06	0.703333	3.24888	0.000163918	0.011891	up	TTC12	PREDICTED: tetratricopeptide repeat protein 12 isoform X1 [Ovis aries]	-	-	-	-	-	-	-
330	gene19128	87.6667	257.167	3.31667	10.135	1.54151	0.000100249	0.00878382	up	CD3E	T-cell surface glycoprotein CD3 epsilon chain precursor [Ovis aries]	Organismal Systems	Immune system	ko04660//T cell receptor signaling pathway;ko04640//Hematopoietic cell lineage	K06451	GO:0098796//membrane protein complex;GO:0043235//receptor complex;GO:0043234//protein complex;GO:0005886//plasma membrane;GO:0044459//plasma membrane part;GO:0005623//cell;GO:0098802//plasma membrane receptor complex;GO:0044425//membrane part;GO:0071944//cell periphery;GO:0016020//membrane;GO:0098797//plasma membrane protein complex;GO:0031224//intrinsic component of membrane;GO:0044464//cell par…	GO:0005488//binding;GO:0019904//protein domain specific binding;GO:0046983//protein dimerization activity;GO:0060089//molecular transducer activity;GO:0004871//signal transducer activity;GO:0005515//protein binding;GO:0038023//signaling receptor activity;GO:0004872//receptor activity	GO:0071704//organic substance metabolic process;GO:1903037//regulation of leukocyte cell-cell adhesion;GO:0048513//animal organ development;GO:0051239//regulation of multicellular organismal process;GO:0050851//antigen receptor-mediated signaling pathway;GO:0001934//positive regulation of protein phosphorylation;GO:0098602//single organism cell adhesion;GO:0098609//cell-cell adhesion;GO:0002429//…
331	gene1913	0	90.6667	0.001	1.77833	9.2019	0.000209809	0.0132609	up	CCDC54	PREDICTED: coiled-coil domain-containing protein 54 [Ovis aries]	-	-	-	-	-	-	-
332	gene19266	140	62	4.415	2.02	-1.12481	0.00140464	0.038041	down	LOC101122548	PREDICTED: polypeptide N-acetylgalactosaminyltransferase 18 isoform X2 [Ovis aries musimon]	Metabolism	Glycan biosynthesis and metabolism	ko00512//Mucin type O-glycan biosynthesis	K00710	-	-	-
333	gene19272	164	45.3333	4.56667	1.31833	-1.77997	0.000219633	0.0136313	down	LYVE1	PREDICTED: lymphatic vessel endothelial hyaluronic acid receptor 1 [Ovis aries]	-	-	-	-	GO:0005623//cell;GO:0043227//membrane-bounded organelle;GO:1903561//extracellular vesicle;GO:0005576//extracellular region;GO:0044421//extracellular region part;GO:0043226//organelle;GO:0031982//vesicle;GO:0044464//cell part;GO:0043230//extracellular organelle;GO:0031224//intrinsic component of membrane;GO:0044425//membrane part;GO:0016020//membrane	GO:0005488//binding;GO:0097367//carbohydrate derivative binding;GO:0005539//glycosaminoglycan binding	GO:0051234//establishment of localization;GO:1901575//organic substance catabolic process;GO:0071704//organic substance metabolic process;GO:1901135//carbohydrate derivative metabolic process;GO:0022610//biological adhesion;GO:0006026//aminoglycan catabolic process;GO:0006807//nitrogen compound metabolic process;GO:1901136//carbohydrate derivative catabolic process;GO:1901565//organonitrogen comp…
334	gene19293	0.166667	36	0.00333333	0.846667	6.69989	0.00212602	0.0486697	up	C15H11orf16	Chromosome 11 open reading frame 16 [Bos taurus]	-	-	-	-	-	-	-
335	gene19440	0	54.1667	0.001	1.14167	8.46141	0.000415857	0.0192057	up	UBQLNL	PREDICTED: ubiquilin-like protein [Ovis aries]	Genetic Information Processing	Folding, sorting and degradation	ko04141//Protein processing in endoplasmic reticulum	K04523	-	-	-
336	gene19441	0	96.8333	0.001	1.94	9.29658	0.000194816	0.0127274	up	UBQLN3	PREDICTED: LOW QUALITY PROTEIN: ubiquilin-3 [Ovis aries]	Genetic Information Processing	Folding, sorting and degradation	ko04141//Protein processing in endoplasmic reticulum	K04523	-	-	-
337	gene19442	0	100.667	0.001	2.58667	9.35244	0.000185089	0.0124925	up	LOC101120692	PREDICTED: ubiquilin-1-like [Ovis aries]	-	-	-	-	-	-	-
338	gene19467	68.1667	702	6.94333	79.5317	3.28391	0.000545139	0.0221859	up	LOC101105437	PREDICTED: hemoglobin subunit beta isoform X1 [Ovis aries]	-	-	-	-	GO:0043234//protein complex;GO:0032991//macromolecular complex	GO:0043169//cation binding;GO:0022892//substrate-specific transporter activity;GO:0097159//organic cyclic compound binding;GO:0046872//metal ion binding;GO:0005215//transporter activity;GO:0046914//transition metal ion binding;GO:0046906//tetrapyrrole binding;GO:0043167//ion binding;GO:0005488//binding;GO:1901363//heterocyclic compound binding	GO:0015669//gas transport;GO:0051179//localization;GO:0044699//single-organism process;GO:1902578//single-organism localization;GO:0006810//transport;GO:0044765//single-organism transport;GO:0051234//establishment of localization
339	gene19618	319.667	663.833	4.705	11.7467	1.06688	0.000647374	0.0242025	up	CLPB	PREDICTED: caseinolytic peptidase B protein homolog isoform X1 [Ovis aries]	-	-	-	-	-	-	-
340	gene19639	388.833	1106.5	11.4883	33.8617	1.55662	1.59777e-09	5.94984e-06	up	UCP2	mitochondrial uncoupling protein 2 [Ovis aries]	-	-	-	-	-	-	-
341	gene19644	57.6667	18	0.531667	0.171667	-1.52728	0.00219852	0.0497458	down	P4HA3	PREDICTED: prolyl 4-hydroxylase subunit alpha-3 isoform X3 [Ovis aries musimon]	Metabolism	Amino acid metabolism	ko00330//Arginine and proline metabolism	K00472	-	-	-
342	gene19652	739.333	139.5	19.2567	3.70833	-2.24223	4.48297e-07	0.000263587	down	CHRDL2	PREDICTED: chordin-like protein 2 isoform X1 [Ovis aries]	-	-	-	-	-	-	-
343	gene19663	841.985	403	7.90167	3.89667	-1.00314	0.000838583	0.0285176	down	SLCO2B1	PREDICTED: solute carrier organic anion transporter family member 2B1 isoform X1 [Ovis aries]	-	-	-	-	GO:0044425//membrane part;GO:0031224//intrinsic component of membrane;GO:0016020//membrane	-	GO:0051179//localization;GO:0006810//transport;GO:0051234//establishment of localization;GO:0044765//single-organism transport;GO:1902578//single-organism localization;GO:0044699//single-organism process
344	gene19670	4008	1490.67	106.517	41.2183	-1.23349	2.62886e-05	0.00435086	down	SERPINH1	PREDICTED: serpin H1 [Ovis aries]	-	-	-	-	-	-	-
345	gene19815	479.333	208.5	7.72667	3.45	-1.09455	1.45681e-05	0.0029062	down	TP53I11	PREDICTED: tumor protein p53-inducible protein 11 isoform X1 [Ovis aries]	-	-	-	-	GO:0031224//intrinsic component of membrane;GO:0016020//membrane;GO:0044425//membrane part	-	-
346	gene19833	121.333	52	3.10667	1.37333	-1.12006	0.00164183	0.0415944	down	CREB3L1	PREDICTED: cyclic AMP-responsive element-binding protein 3-like protein 1 isoform X1 [Ovis aries]	Organismal Systems;Environmental Information Processing	Nervous system;Excretory system;Signal transduction;Endocrine system;Circulatory system	ko04151//PI3K-Akt signaling pathway;ko04024//cAMP signaling pathway;ko04022//cGMP - PKG signaling pathway;ko04261//Adrenergic signaling in cardiomyocytes;ko04728//Dopaminergic synapse;ko04152//AMPK signaling pathway;ko04668//TNF signaling pathway;ko04725//Cholinergic synapse;ko04915//Estrogen signaling pathway;ko04916//Melanogenesis;ko04922//Glucagon signaling pathway;ko04911//Insulin secretion;k…	K09048	GO:0005623//cell;GO:0005622//intracellular;GO:0043231//intracellular membrane-bounded organelle;GO:0043226//organelle;GO:0044424//intracellular part;GO:0044464//cell part;GO:0043227//membrane-bounded organelle;GO:0043229//intracellular organelle	GO:0001067//regulatory region nucleic acid binding;GO:0044212//transcription regulatory region DNA binding;GO:0097159//organic cyclic compound binding;GO:0003676//nucleic acid binding;GO:0003677//DNA binding;GO:0001071//nucleic acid binding transcription factor activity;GO:0005488//binding;GO:0000975//regulatory region DNA binding;GO:1901363//heterocyclic compound binding	GO:1901360//organic cyclic compound metabolic process;GO:0043170//macromolecule metabolic process;GO:0097659//nucleic acid-templated transcription;GO:0044699//single-organism process;GO:0016070//RNA metabolic process;GO:0044260//cellular macromolecule metabolic process;GO:0050789//regulation of biological process;GO:0006366//transcription from RNA polymerase II promoter;GO:0071704//organic substa…
347	gene19836	290.167	112	19.6283	7.87333	-1.31452	0.000443218	0.0200111	down	MDK	PREDICTED: midkine isoform X1 [Ovis aries]	-	-	-	-	-	-	-
348	gene19843	4.83333	86.1667	0.123333	2.29833	3.89851	0.00143688	0.0385869	up	F2	prothrombin precursor [Ovis aries]	Organismal Systems;Cellular Processes;Environmental Information Processing	Immune system;Cell motility;Signaling molecules and interaction	ko04080//Neuroactive ligand-receptor interaction;ko04810//Regulation of actin cytoskeleton;ko04610//Complement and coagulation cascades	K01313	GO:0005623//cell;GO:1903561//extracellular vesicle;GO:0043227//membrane-bounded organelle;GO:0044464//cell part;GO:0031982//vesicle;GO:0043230//extracellular organelle;GO:0005615//extracellular space;GO:0044444//cytoplasmic part;GO:0005737//cytoplasm;GO:0044424//intracellular part;GO:0044421//extracellular region part;GO:0043226//organelle;GO:0005576//extracellular region;GO:0005622//intracellular	GO:0043167//ion binding;GO:0004175//endopeptidase activity;GO:0038023//signaling receptor activity;GO:0005488//binding;GO:0005515//protein binding;GO:0008233//peptidase activity;GO:0046872//metal ion binding;GO:0032403//protein complex binding;GO:0070011//peptidase activity, acting on L-amino acid peptides;GO:0060089//molecular transducer activity;GO:0003824//catalytic activity;GO:0004872//recept…	GO:0032101//regulation of response to external stimulus;GO:0045686//negative regulation of glial cell differentiation;GO:0010467//gene expression;GO:0009891//positive regulation of biosynthetic process;GO:2000026//regulation of multicellular organismal development;GO:0048731//system development;GO:0001932//regulation of protein phosphorylation;GO:0009889//regulation of biosynthetic process;GO:005…
349	gene1996	0	20.6667	0.001	0.378333	7.08185	0.00207291	0.0477132	up	C1H3orf30	C3orf30 protein [Homo sapiens]	-	-	-	-	-	-	-
350	gene20090	0	20.3333	0.001	0.788333	7.05867	0.00214972	0.0490507	up	MS4A5	PREDICTED: membrane-spanning 4-domains subfamily A member 5 [Ovis aries]	-	-	-	-	GO:0016020//membrane;GO:0044425//membrane part;GO:0031224//intrinsic component of membrane	-	-
351	gene20093	0	148	0.001	6.32	9.90812	5.90294e-05	0.00683365	up	MS4A13	PREDICTED: membrane-spanning 4-domains subfamily A member 13 isoform X4 [Ovis aries]	-	-	-	-	GO:0031224//intrinsic component of membrane;GO:0044425//membrane part;GO:0016020//membrane	-	-
352	gene20104	0	51.08	0.001	1.245	8.37491	0.000461206	0.0204459	up	LOC101114465	PREDICTED: B-lymphocyte antigen CD20-like isoform X1 [Ovis aries]	-	-	-	-	GO:0044425//membrane part;GO:0031224//intrinsic component of membrane;GO:0016020//membrane	-	-
353	gene20117	0.333333	73.6667	0.00333333	0.656667	7.09734	0.00106627	0.0322371	up	LOC105602437	-	-	-	-	-	-	-	-
354	gene20178	112.5	38.6667	1.12667	0.398333	-1.38292	0.00160971	0.0411979	down	ENC1	PREDICTED: ectoderm-neural cortex protein 1 isoform X1 [Ovis aries]	-	-	-	-	GO:0005623//cell;GO:0044428//nuclear part;GO:0043229//intracellular organelle;GO:1902494//catalytic complex;GO:1990234//transferase complex;GO:0005622//intracellular;GO:0044422//organelle part;GO:0031981//nuclear lumen;GO:0043233//organelle lumen;GO:0000785//chromatin;GO:0043226//organelle;GO:0036477//somatodendritic compartment;GO:0044446//intracellular organelle part;GO:0044464//cell part;GO:00…	GO:0008092//cytoskeletal protein binding;GO:0005515//protein binding;GO:0005488//binding	GO:0010498//proteasomal protein catabolic process;GO:0010467//gene expression;GO:0045664//regulation of neuron differentiation;GO:0044257//cellular protein catabolic process;GO:0009058//biosynthetic process;GO:0006518//peptide metabolic process;GO:0050793//regulation of developmental process;GO:0031344//regulation of cell projection organization;GO:0010975//regulation of neuron projection develop…
355	gene20180	118.333	39	0.896667	0.308333	-1.53409	2.7925e-05	0.00455422	down	ARHGEF28	PREDICTED: rho guanine nucleotide exchange factor 28 isoform X9 [Ovis aries]	-	-	-	-	GO:0044464//cell part;GO:0005623//cell	-	GO:0044763//single-organism cellular process;GO:0065009//regulation of molecular function;GO:0050896//response to stimulus;GO:0044699//single-organism process;GO:0050794//regulation of cellular process;GO:0009987//cellular process;GO:0007265//Ras protein signal transduction;GO:0007264//small GTPase mediated signal transduction;GO:0007266//Rho protein signal transduction;GO:0051716//cellular respo…
356	gene20195	0	156.833	0.001	22.065	9.99285	3.34096e-05	0.00497647	up	LOC101115733	PREDICTED: histone H2B subacrosomal variant [Ovis aries]	-	-	-	-	-	-	-
357	gene20196	700.667	314.975	3.67167	1.69167	-1.07388	0.000295979	0.0158207	down	ZNF366	PREDICTED: LOW QUALITY PROTEIN: zinc finger protein 366 isoform X1 [Ovis aries]	-	-	-	-	-	-	-
358	gene20199	281.333	114.167	1.03	0.425	-1.19311	0.000101822	0.00888678	down	MAP1B	PREDICTED: microtubule-associated protein 1B isoform X1 [Ovis aries]	-	-	-	-	-	-	-
359	gene20273	95.3333	22.1667	1.15167	0.273333	-2.01477	2.55274e-06	0.000919933	down	ELOVL7	PREDICTED: elongation of very long chain fatty acids protein 7 [Ovis aries]	Metabolism	Lipid metabolism	ko00062//Fatty acid elongation	K10250	GO:0043227//membrane-bounded organelle;GO:0012505//endomembrane system;GO:0044424//intracellular part;GO:0044425//membrane part;GO:0005622//intracellular;GO:0043229//intracellular organelle;GO:0043226//organelle;GO:0016020//membrane;GO:0005623//cell;GO:0043231//intracellular membrane-bounded organelle;GO:0042175//nuclear outer membrane-endoplasmic reticulum membrane network;GO:0044464//cell part;…	GO:0003824//catalytic activity	GO:0044763//single-organism cellular process;GO:0071704//organic substance metabolic process;GO:0008152//metabolic process;GO:0009987//cellular process;GO:0006633//fatty acid biosynthetic process;GO:0030497//fatty acid elongation;GO:0044255//cellular lipid metabolic process;GO:0019368//fatty acid elongation, unsaturated fatty acid;GO:0044710//single-organism metabolic process;GO:0044711//single-o…
360	gene20284	1.5	38.5	0.00333333	0.193333	4.33763	0.00175985	0.0433522	up	RAB3C	ras-related protein Rab-3C isoform 1 [Bos taurus]	-	-	-	-	GO:0043226//organelle;GO:0005737//cytoplasm;GO:0016020//membrane;GO:0005622//intracellular;GO:0043227//membrane-bounded organelle;GO:0044444//cytoplasmic part;GO:0044464//cell part;GO:0044424//intracellular part;GO:0044456//synapse part;GO:0005623//cell;GO:0045202//synapse	GO:0032550//purine ribonucleoside binding;GO:0003824//catalytic activity;GO:0005488//binding;GO:0097367//carbohydrate derivative binding;GO:0005515//protein binding;GO:0008092//cytoskeletal protein binding;GO:1901363//heterocyclic compound binding;GO:0016818//hydrolase activity, acting on acid anhydrides, in phosphorus-containing anhydrides;GO:0001882//nucleoside binding;GO:0017111//nucleoside-tr…	GO:0051179//localization;GO:0065007//biological regulation;GO:0033036//macromolecule localization;GO:0007165//signal transduction;GO:0051716//cellular response to stimulus;GO:0044763//single-organism cellular process;GO:0006810//transport;GO:0008104//protein localization;GO:0016192//vesicle-mediated transport;GO:0007154//cell communication;GO:1902578//single-organism localization;GO:0044700//sing…
361	gene20375	0	94.3333	0.001	0.428333	9.26038	0.000111665	0.00930942	up	MROH2B	PREDICTED: maestro heat-like repeat-containing protein family member 2B isoform X1 [Ovis aries]	-	-	-	-	-	-	-
362	gene20376	95	372.333	1.06833	4.32667	1.98	4.96613e-06	0.00141467	up	C7	PREDICTED: complement component C7 isoform X1 [Ovis aries]	Organismal Systems	Immune system	ko04610//Complement and coagulation cascades	K03996	GO:0043227//membrane-bounded organelle;GO:0043226//organelle;GO:1903561//extracellular vesicle;GO:0044421//extracellular region part;GO:0043230//extracellular organelle;GO:0005576//extracellular region;GO:0031982//vesicle	-	GO:0065007//biological regulation;GO:0072376//protein activation cascade;GO:0048584//positive regulation of response to stimulus;GO:0016064//immunoglobulin mediated immune response;GO:0002455//humoral immune response mediated by circulating immunoglobulin;GO:0019538//protein metabolic process;GO:0071704//organic substance metabolic process;GO:0002443//leukocyte mediated immunity;GO:0009987//cellu…
363	gene20382	754.5	318.167	10.225	4.51	-1.20637	0.000104813	0.00893829	down	PTGER4	PREDICTED: prostaglandin E2 receptor EP4 subtype isoform X1 [Ovis aries]	Organismal Systems;Environmental Information Processing	Sensory system;Signaling molecules and interaction;Endocrine system	ko04080//Neuroactive ligand-receptor interaction;ko04750//Inflammatory mediator regulation of TRP channels;ko04924//Renin secretion	K04261	GO:0031224//intrinsic component of membrane;GO:0016020//membrane;GO:0044425//membrane part	GO:0060089//molecular transducer activity;GO:0099600//transmembrane receptor activity;GO:0038023//signaling receptor activity;GO:0004888//transmembrane signaling receptor activity;GO:0004872//receptor activity;GO:0004955//prostaglandin receptor activity;GO:0004871//signal transducer activity;GO:0004930//G-protein coupled receptor activity;GO:0004953//icosanoid receptor activity;GO:0004954//prosta…	GO:0046649//lymphocyte activation;GO:0002294//CD4-positive, alpha-beta T cell differentiation involved in immune response;GO:0010033//response to organic substance;GO:0051716//cellular response to stimulus;GO:0002683//negative regulation of immune system process;GO:0098609//cell-cell adhesion;GO:0030154//cell differentiation;GO:0050896//response to stimulus;GO:0032231//regulation of actin filamen…
364	gene204	1676.83	766.833	2.905	1.38667	-1.04337	5.92933e-06	0.00155858	down	MACF1	PREDICTED: microtubule-actin cross-linking factor 1, isoforms 1/2/3/5 isoform X1 [Capra hircus]	-	-	-	-	GO:0015630//microtubule cytoskeleton;GO:0005622//intracellular;GO:0043231//intracellular membrane-bounded organelle;GO:0043227//membrane-bounded organelle;GO:0005856//cytoskeleton;GO:0043226//organelle;GO:0005623//cell;GO:0044464//cell part;GO:0044424//intracellular part;GO:0001726//ruffle;GO:0042995//cell projection;GO:0016020//membrane;GO:0043229//intracellular organelle;GO:0043232//intracellul…	GO:0003676//nucleic acid binding;GO:0016818//hydrolase activity, acting on acid anhydrides, in phosphorus-containing anhydrides;GO:0016462//pyrophosphatase activity;GO:0008092//cytoskeletal protein binding;GO:0043167//ion binding;GO:0046872//metal ion binding;GO:0005488//binding;GO:0017111//nucleoside-triphosphatase activity;GO:0016817//hydrolase activity, acting on acid anhydrides;GO:0003824//ca…	GO:0070727//cellular macromolecule localization;GO:0051716//cellular response to stimulus;GO:0051649//establishment of localization in cell;GO:0009987//cellular process;GO:0044763//single-organism cellular process;GO:0050896//response to stimulus;GO:0007154//cell communication;GO:0007049//cell cycle;GO:0051128//regulation of cellular component organization;GO:0007166//cell surface receptor signal…
365	gene20425	1	45.3333	0.025	1.31667	5.03263	0.00164791	0.0416384	up	TTC23L	PREDICTED: tetratricopeptide repeat protein 23-like isoform X1 [Ovis aries]	-	-	-	-	GO:0043226//organelle;GO:0043232//intracellular non-membrane-bounded organelle;GO:0005623//cell;GO:0044464//cell part;GO:0015630//microtubule cytoskeleton;GO:0044424//intracellular part;GO:0043228//non-membrane-bounded organelle;GO:0005856//cytoskeleton;GO:0005622//intracellular;GO:0043229//intracellular organelle	-	-
366	gene20484	348.833	164.167	2.66833	1.28667	-1.02041	0.000927178	0.029747	down	LOC101102178	PREDICTED: LOW QUALITY PROTEIN: unconventional myosin-X isoform X1, partial [Ovis aries]	Organismal Systems	Immune system	ko04666//Fc gamma R-mediated phagocytosis	K12559	GO:0015629//actin cytoskeleton;GO:0036477//somatodendritic compartment;GO:0044422//organelle part;GO:0044424//intracellular part;GO:0097458//neuron part;GO:0044464//cell part;GO:0043227//membrane-bounded organelle;GO:0044446//intracellular organelle part;GO:0005737//cytoplasm;GO:0098858//actin-based cell projection;GO:0070013//intracellular organelle lumen;GO:0044428//nuclear part;GO:0031974//mem…	GO:0003779//actin binding;GO:0008092//cytoskeletal protein binding;GO:0003774//motor activity;GO:0016818//hydrolase activity, acting on acid anhydrides, in phosphorus-containing anhydrides;GO:0042623//ATPase activity, coupled;GO:0097367//carbohydrate derivative binding;GO:0016787//hydrolase activity;GO:1901981//phosphatidylinositol phosphate binding;GO:0005515//protein binding;GO:0000146//microfi…	GO:0046847//filopodium assembly;GO:0065007//biological regulation;GO:0030030//cell projection organization;GO:0046907//intracellular transport;GO:0098602//single organism cell adhesion;GO:0044699//single-organism process;GO:0051234//establishment of localization;GO:0022610//biological adhesion;GO:0044085//cellular component biogenesis;GO:0071840//cellular component organization or biogenesis;GO:0…
367	gene20488	0	67.3333	0.001	2.225	8.77402	0.000309189	0.0161597	up	2019-03-11	PREDICTED: E3 ubiquitin-protein ligase MARCH11 isoform X1, partial [Ovis aries]	-	-	-	-	GO:0012506//vesicle membrane;GO:0005737//cytoplasm;GO:0031982//vesicle;GO:0031224//intrinsic component of membrane;GO:0031090//organelle membrane;GO:0005622//intracellular;GO:0043227//membrane-bounded organelle;GO:0043226//organelle;GO:0044424//intracellular part;GO:0044422//organelle part;GO:0044425//membrane part;GO:0016020//membrane;GO:0044464//cell part;GO:0005623//cell	GO:0003824//catalytic activity;GO:0005488//binding;GO:0043167//ion binding;GO:0043169//cation binding	GO:0009987//cellular process;GO:0036211//protein modification process;GO:0070647//protein modification by small protein conjugation or removal;GO:0019538//protein metabolic process;GO:0044260//cellular macromolecule metabolic process;GO:0043170//macromolecule metabolic process;GO:0071704//organic substance metabolic process;GO:0044237//cellular metabolic process;GO:0008152//metabolic process;GO:0…
368	gene20490	347	148.333	2.11833	0.943333	-1.15316	1.73662e-06	0.000705477	down	FBXL7	PREDICTED: LOW QUALITY PROTEIN: F-box/LRR-repeat protein 7 isoform X1 [Ovis aries]	-	-	-	-	GO:0032991//macromolecular complex;GO:0043234//protein complex;GO:0005622//intracellular;GO:0031461//cullin-RING ubiquitin ligase complex;GO:1990234//transferase complex;GO:0015630//microtubule cytoskeleton;GO:1902494//catalytic complex;GO:0044422//organelle part;GO:0000151//ubiquitin ligase complex;GO:0044424//intracellular part;GO:0044464//cell part;GO:0005815//microtubule organizing center;GO:…	-	GO:0032446//protein modification by small protein conjugation;GO:0044237//cellular metabolic process;GO:0070647//protein modification by small protein conjugation or removal;GO:0043412//macromolecule modification;GO:0044248//cellular catabolic process;GO:0006511//ubiquitin-dependent protein catabolic process;GO:0009987//cellular process;GO:0044257//cellular protein catabolic process;GO:0043161//p…
369	gene20507	1.33333	360.667	0.0783333	21.38	7.67387	6.92194e-05	0.00764398	up	ROPN1L	PREDICTED: ropporin-1-like protein [Capra hircus]	-	-	-	-	GO:0005623//cell;GO:0042995//cell projection;GO:0044464//cell part;GO:0005929//cilium;GO:0043226//organelle	-	-
370	gene20545	275.833	533.167	4.68	9.25167	1.03576	0.000303813	0.016082	up	LRRC14B	PREDICTED: leucine-rich repeat-containing protein 14B isoform X2 [Ovis aries musimon]	-	-	-	-	-	-	-
371	gene20643	0	18.5	0.001	0.186667	6.92613	0.00139609	0.0379014	up	C17H4orf51	chromosome 4 open reading frame 51 [Macaca mulatta]	-	-	-	-	-	-	-
372	gene2065	0	283	0.001	15.185	10.8427	1.31074e-05	0.00275326	up	ROPN1	PREDICTED: ropporin-1A [Ovis aries]	-	-	-	-	GO:0005623//cell;GO:0005929//cilium;GO:0044464//cell part;GO:0031514//motile cilium;GO:0005622//intracellular;GO:0097223//sperm part;GO:0044424//intracellular part;GO:0043226//organelle;GO:0036126//sperm flagellum;GO:0042995//cell projection	-	GO:0016043//cellular component organization;GO:0051641//cellular localization;GO:0033036//macromolecule localization;GO:0044699//single-organism process;GO:0034613//cellular protein localization;GO:0008104//protein localization;GO:0040011//locomotion;GO:0071840//cellular component organization or biogenesis;GO:0032502//developmental process;GO:0009987//cellular process;GO:0051179//localization;GO…
373	gene20744	193.167	88.6667	0.44	0.208333	-1.03926	0.000491834	0.0211328	down	FAT4	PREDICTED: LOW QUALITY PROTEIN: protocadherin Fat 4 isoform X1 [Ovis aries]	-	-	-	-	GO:0031224//intrinsic component of membrane;GO:0031982//vesicle;GO:0043230//extracellular organelle;GO:0005576//extracellular region;GO:0016020//membrane;GO:0044421//extracellular region part;GO:0043226//organelle;GO:0044425//membrane part;GO:0005623//cell;GO:0043227//membrane-bounded organelle;GO:1903561//extracellular vesicle;GO:0044464//cell part	GO:0043169//cation binding;GO:0046872//metal ion binding;GO:0005488//binding;GO:0043167//ion binding	GO:0035556//intracellular signal transduction;GO:0050896//response to stimulus;GO:0044707//single-multicellular organism process;GO:0007165//signal transduction;GO:0050793//regulation of developmental process;GO:0072182//regulation of nephron tubule epithelial cell differentiation;GO:0050794//regulation of cellular process;GO:0044763//single-organism cellular process;GO:0030900//forebrain develop…
374	gene20759	4.83333	81.1667	0.225	4.05167	3.79958	0.00176938	0.0434431	up	LOC101104012	PREDICTED: centrin-4 isoform X1 [Ovis aries]	-	-	-	-	-	-	-
375	gene2076	937.5	360.167	3.24167	1.28	-1.26186	1.07665e-07	0.000109344	down	HEG1	PREDICTED: LOW QUALITY PROTEIN: protein HEG homolog 1 isoform X1 [Ovis aries]	-	-	-	-	GO:0016020//membrane;GO:0005886//plasma membrane;GO:0071944//cell periphery;GO:0005623//cell;GO:0030054//cell junction;GO:0044425//membrane part;GO:0044464//cell part;GO:0031224//intrinsic component of membrane	GO:0005488//binding;GO:0043169//cation binding;GO:0043167//ion binding;GO:0046872//metal ion binding	GO:0048514//blood vessel morphogenesis;GO:0009987//cellular process;GO:0048729//tissue morphogenesis;GO:0051239//regulation of multicellular organismal process;GO:0048644//muscle organ morphogenesis;GO:0007517//muscle organ development;GO:0009888//tissue development;GO:0014706//striated muscle tissue development;GO:0030855//epithelial cell differentiation;GO:0061061//muscle structure development;…
376	gene20762	0	63	0.001	1.39	8.67842	0.00033978	0.016833	up	ADAD1	PREDICTED: adenosine deaminase domain-containing protein 1 isoform X1 [Ovis aries]	-	-	-	-	GO:0043229//intracellular organelle;GO:0043231//intracellular membrane-bounded organelle;GO:0044424//intracellular part;GO:0043226//organelle;GO:0005622//intracellular;GO:0044464//cell part;GO:0005623//cell;GO:0043227//membrane-bounded organelle	GO:0003824//catalytic activity;GO:0016814//hydrolase activity, acting on carbon-nitrogen (but not peptide) bonds, in cyclic amidines;GO:0016810//hydrolase activity, acting on carbon-nitrogen (but not peptide) bonds;GO:0016787//hydrolase activity	GO:0007276//gamete generation;GO:0048468//cell development;GO:0032504//multicellular organism reproduction;GO:0019953//sexual reproduction;GO:0044767//single-organism developmental process;GO:0009987//cellular process;GO:0071704//organic substance metabolic process;GO:0030154//cell differentiation;GO:0032502//developmental process;GO:0022412//cellular process involved in reproduction in multicell…
377	gene20790	1340.5	627.333	10.0367	4.81667	-1.04013	0.000130664	0.0103435	down	FAM198B	PREDICTED: protein FAM198B isoform X2 [Ovis aries]	-	-	-	-	GO:0016020//membrane;GO:0031224//intrinsic component of membrane;GO:0044425//membrane part	-	-
378	gene208	0.166667	129.537	0.00166667	2.16167	8.54855	0.000119555	0.00971217	up	LOC105604051	PREDICTED: succinyl-CoA:3-ketoacid coenzyme A transferase 2, mitochondrial-like [Ovis aries]	Metabolism	Amino acid metabolism;Carbohydrate metabolism;Lipid metabolism	ko00280//Valine, leucine and isoleucine degradation;ko00650//Butanoate metabolism;ko00072//Synthesis and degradation of ketone bodies	K01027	-	GO:0016782//transferase activity, transferring sulfur-containing groups;GO:0016740//transferase activity;GO:0003824//catalytic activity;GO:0008410//CoA-transferase activity	GO:0044248//cellular catabolic process;GO:0044237//cellular metabolic process;GO:0009056//catabolic process;GO:0009987//cellular process;GO:0008152//metabolic process
379	gene2085	0.666667	18	0.0183333	0.488333	4.28697	0.00154727	0.0401984	up	IQCG	PREDICTED: IQ domain-containing protein G isoform X1 [Ovis aries]	-	-	-	-	GO:0031982//vesicle;GO:0043230//extracellular organelle;GO:1903561//extracellular vesicle;GO:0043227//membrane-bounded organelle;GO:0043226//organelle;GO:0005576//extracellular region;GO:0044421//extracellular region part	-	-
380	gene20955	0	32.1667	0.001	0.598333	7.71405	0.000976375	0.0306595	up	CCDC63	PREDICTED: coiled-coil domain-containing protein 63 [Ovis aries]	-	-	-	-	-	-	GO:0019953//sexual reproduction;GO:0051704//multi-organism process;GO:0048609//multicellular organismal reproductive process;GO:0044699//single-organism process;GO:0044702//single organism reproductive process;GO:0048869//cellular developmental process;GO:0032504//multicellular organism reproduction;GO:0044703//multi-organism reproductive process;GO:0022414//reproductive process;GO:0007276//gamet…
381	gene20969	0.266667	6.72167	0.00833333	0.193333	3.80375	0.00137941	0.0376917	up	LOC105602884	-	-	-	-	-	-	-	-
382	gene20974	0	87.1667	0.001	1.23167	9.14662	0.000117977	0.0097002	up	CCDC60	PREDICTED: coiled-coil domain-containing protein 60 isoform X1 [Ovis aries]	-	-	-	-	-	-	-
383	gene210	1280.33	551.333	17.0017	7.68	-1.01334	0.000882747	0.0291726	down	HEYL	PREDICTED: hairy/enhancer-of-split related with YRPW motif-like protein isoform X1 [Ovis aries]	-	-	-	-	GO:0043227//membrane-bounded organelle;GO:0043229//intracellular organelle;GO:0044424//intracellular part;GO:0005622//intracellular;GO:0005623//cell;GO:0043231//intracellular membrane-bounded organelle;GO:0043226//organelle;GO:0044464//cell part	GO:0003677//DNA binding;GO:0005488//binding;GO:0000982//transcription factor activity, RNA polymerase II core promoter proximal region sequence-specific binding;GO:0000981//RNA polymerase II transcription factor activity, sequence-specific DNA binding;GO:0003676//nucleic acid binding;GO:0003690//double-stranded DNA binding;GO:0003696//satellite DNA binding;GO:0043565//sequence-specific DNA bindin…	GO:0070848//response to growth factor;GO:0003203//endocardial cushion morphogenesis;GO:2000113//negative regulation of cellular macromolecule biosynthetic process;GO:0071310//cellular response to organic substance;GO:0010629//negative regulation of gene expression;GO:0050794//regulation of cellular process;GO:0048869//cellular developmental process;GO:0014031//mesenchymal cell development;GO:0003…
384	gene21023	4.5	44.3333	0.11	1.12667	3.05318	0.00184372	0.044582	up	IQCD	PREDICTED: LOW QUALITY PROTEIN: IQ domain-containing protein D isoform X1 [Ovis aries]	-	-	-	-	-	-	-
385	gene21040	0	33.6367	0.001	0.461667	7.78044	0.000469999	0.0205502	up	LOC101115734	PREDICTED: disintegrin and metalloproteinase domain-containing protein 1a-like [Ovis aries]	-	-	-	-	GO:0031224//intrinsic component of membrane;GO:0016020//membrane;GO:0044425//membrane part	GO:0016787//hydrolase activity;GO:0070011//peptidase activity, acting on L-amino acid peptides;GO:0005488//binding;GO:0046914//transition metal ion binding;GO:0008233//peptidase activity;GO:0003824//catalytic activity;GO:0043167//ion binding;GO:0046872//metal ion binding;GO:0043169//cation binding	GO:0019538//protein metabolic process;GO:0043170//macromolecule metabolic process;GO:0044238//primary metabolic process;GO:0008152//metabolic process;GO:0071704//organic substance metabolic process
386	gene21169	0	35.8333	0.001	0.911667	7.86867	0.000798157	0.0276541	up	HORMAD2	PREDICTED: HORMA domain-containing protein 2 isoform X1 [Ovis aries]	-	-	-	-	GO:0031974//membrane-enclosed lumen;GO:0043233//organelle lumen;GO:0005634//nucleus;GO:0044422//organelle part;GO:0043231//intracellular membrane-bounded organelle;GO:0043227//membrane-bounded organelle;GO:0044428//nuclear part;GO:0044424//intracellular part;GO:0043228//non-membrane-bounded organelle;GO:0044464//cell part;GO:0000794//condensed nuclear chromosome;GO:0005623//cell;GO:0005622//intra…	-	GO:0000003//reproduction;GO:0000819//sister chromatid segregation;GO:0022402//cell cycle process;GO:0007059//chromosome segregation;GO:0044699//single-organism process;GO:0006996//organelle organization;GO:0016043//cellular component organization;GO:0044763//single-organism cellular process;GO:1902589//single-organism organelle organization;GO:0098813//nuclear chromosome segregation;GO:0051276//c…
387	gene21178	2.66667	51.5	0.0433333	0.865	3.98659	0.00207356	0.0477132	up	SEC14L2	PREDICTED: SEC14-like protein 2 isoform X5 [Ovis aries musimon]	-	-	-	-	GO:0043229//intracellular organelle;GO:0005622//intracellular;GO:0043231//intracellular membrane-bounded organelle;GO:0043226//organelle;GO:0043227//membrane-bounded organelle;GO:0005623//cell;GO:0016020//membrane;GO:0044464//cell part;GO:0044424//intracellular part;GO:0044425//membrane part;GO:0031224//intrinsic component of membrane	GO:0005488//binding	GO:0032774//RNA biosynthetic process;GO:0018130//heterocycle biosynthetic process;GO:1901362//organic cyclic compound biosynthetic process;GO:0009987//cellular process;GO:1901360//organic cyclic compound metabolic process;GO:0051179//localization;GO:0044271//cellular nitrogen compound biosynthetic process;GO:0090304//nucleic acid metabolic process;GO:0009059//macromolecule biosynthetic process;GO…
388	gene21179	269.667	710.667	7.68333	20.7833	1.56366	9.8925e-05	0.00877636	up	MTFP1	PREDICTED: mitochondrial fission process protein 1 [Pantholops hodgsonii]	-	-	-	-	GO:0005622//intracellular;GO:0043231//intracellular membrane-bounded organelle;GO:0044424//intracellular part;GO:0043227//membrane-bounded organelle;GO:0043229//intracellular organelle;GO:0016020//membrane;GO:0005623//cell;GO:0031090//organelle membrane;GO:0044464//cell part;GO:0019866//organelle inner membrane;GO:0044422//organelle part;GO:0031975//envelope;GO:0044446//intracellular organelle pa…	-	-
389	gene21188	10.8333	165.833	0.123333	1.93667	3.69935	0.000503028	0.0212863	up	OSBP2	PREDICTED: LOW QUALITY PROTEIN: oxysterol-binding protein 2 isoform X1 [Ovis aries]	-	-	-	-	GO:0036477//somatodendritic compartment;GO:0043005//neuron projection;GO:0097458//neuron part;GO:0044464//cell part;GO:0030425//dendrite;GO:0005623//cell;GO:0042995//cell projection	GO:0008289//lipid binding;GO:0005488//binding;GO:0032934//sterol binding;GO:0097159//organic cyclic compound binding;GO:0005496//steroid binding	GO:0003006//developmental process involved in reproduction;GO:0007281//germ cell development;GO:0044763//single-organism cellular process;GO:0051704//multi-organism process;GO:0032501//multicellular organismal process;GO:0007276//gamete generation;GO:0044703//multi-organism reproductive process;GO:0032502//developmental process;GO:0009987//cellular process;GO:0000003//reproduction;GO:0044702//sin…
390	gene212	25.3333	79.3333	0.236667	0.766667	1.76829	8.88613e-05	0.00831722	up	HPCAL4	hippocalcin-like protein 4 isoform 1 [Homo sapiens]	-	-	-	-	GO:0044464//cell part;GO:0005623//cell	GO:0005488//binding;GO:0005515//protein binding;GO:0046872//metal ion binding;GO:0043169//cation binding;GO:0043167//ion binding	GO:0044763//single-organism cellular process;GO:0007154//cell communication;GO:0007399//nervous system development;GO:0048856//anatomical structure development;GO:0044707//single-multicellular organism process;GO:0007275//multicellular organism development;GO:0032501//multicellular organismal process;GO:0032502//developmental process;GO:0044767//single-organism developmental process;GO:0048731//s…
391	gene21235	3	18.6667	0.161667	1.04833	2.52326	0.00180523	0.0439372	up	DERL3	PREDICTED: derlin-3 [Ovis aries]	Genetic Information Processing	Folding, sorting and degradation	ko04141//Protein processing in endoplasmic reticulum	K13989	GO:0005622//intracellular;GO:0031224//intrinsic component of membrane;GO:0005623//cell;GO:0043226//organelle;GO:0005737//cytoplasm;GO:0042175//nuclear outer membrane-endoplasmic reticulum membrane network;GO:0043227//membrane-bounded organelle;GO:0044444//cytoplasmic part;GO:0044424//intracellular part;GO:0016020//membrane;GO:0005783//endoplasmic reticulum;GO:0012505//endomembrane system;GO:00444…	-	GO:0051649//establishment of localization in cell;GO:0051716//cellular response to stimulus;GO:0006464//cellular protein modification process;GO:0044723//single-organism carbohydrate metabolic process;GO:0043412//macromolecule modification;GO:0019538//protein metabolic process;GO:1903513//endoplasmic reticulum to cytosol transport;GO:0044237//cellular metabolic process;GO:0046907//intracellular t…
392	gene21240	0.166667	53	0.01	3.28167	7.22694	0.00069824	0.0253866	up	LOC101111397	PREDICTED: glutathione S-transferase theta-4 isoform X1 [Ovis aries]	-	-	-	-	-	-	-
393	gene21267	8	61.5	0.106667	0.871667	2.7123	0.000832797	0.0284514	up	CCDC116	PREDICTED: LOW QUALITY PROTEIN: coiled-coil domain-containing protein 116 isoform X1 [Ovis aries]	-	-	-	-	-	-	-
394	gene21270	1	219.667	0.01	2.50167	7.30825	0.000126969	0.0100956	up	LOC101116768	PREDICTED: LOW QUALITY PROTEIN: RIMS-binding protein 3B [Ovis aries]	-	-	-	-	-	-	-
395	gene21278	23.3467	372.602	0.67	11.155	3.76857	9.23486e-05	0.00842182	up	TUBA3E	PREDICTED: tubulin alpha-3 chain isoform X1 [Bos taurus]	Cellular Processes	Cellular commiunity;Transport and catabolism	ko04145//Phagosome;ko04540//Gap junction	K07374	GO:0043232//intracellular non-membrane-bounded organelle;GO:0044430//cytoskeletal part;GO:0043227//membrane-bounded organelle;GO:0005622//intracellular;GO:0044422//organelle part;GO:0044446//intracellular organelle part;GO:0015630//microtubule cytoskeleton;GO:0005856//cytoskeleton;GO:0043231//intracellular membrane-bounded organelle;GO:0043226//organelle;GO:0042995//cell projection;GO:0005815//mi…	GO:1901363//heterocyclic compound binding;GO:0001882//nucleoside binding;GO:0005198//structural molecule activity;GO:0016818//hydrolase activity, acting on acid anhydrides, in phosphorus-containing anhydrides;GO:0016462//pyrophosphatase activity;GO:0032550//purine ribonucleoside binding;GO:0036094//small molecule binding;GO:0017111//nucleoside-triphosphatase activity;GO:0016817//hydrolase activit…	GO:0044699//single-organism process;GO:0044763//single-organism cellular process;GO:0009987//cellular process
396	gene21351	230.005	444.5	3.68833	9.14333	1.0061	9.80519e-05	0.0087631	up	PGPEP1L	PREDICTED: pyroglutamyl-peptidase 1-like protein isoform X1 [Bos taurus]	-	-	-	-	-	-	-
397	gene21438	0	12	0.001	0.321667	6.32797	0.00149899	0.0392637	up	RHCG	PREDICTED: ammonium transporter Rh type C isoform X1 [Ovis aries]	-	-	-	-	-	-	-
398	gene21453	586	272.833	6.68667	3.21167	-1.00162	0.000276509	0.0151522	down	LOC105603094	-	-	-	-	-	-	-	-
399	gene21455	75.1667	152	0.99	2.11333	1.09687	0.00198162	0.0463616	up	SEMA4B	PREDICTED: semaphorin-4B isoform X1 [Ovis aries]	Organismal Systems	Development	ko04360//Axon guidance	K06521	GO:0044425//membrane part;GO:0016020//membrane;GO:0031224//intrinsic component of membrane	-	GO:0044699//single-organism process;GO:0044763//single-organism cellular process;GO:0065007//biological regulation;GO:0050789//regulation of biological process;GO:0050896//response to stimulus;GO:0009987//cellular process;GO:0040011//locomotion;GO:0050794//regulation of cellular process
400	gene21464	115.833	218.167	6.85333	13.5183	1.00445	0.00147993	0.0391589	up	HDDC3	PREDICTED: guanosine-3',5'-bis(diphosphate) 3'-pyrophosphohydrolase MESH1 isoform X1 [Ovis aries]	Metabolism	Nucleotide metabolism	ko00230//Purine metabolism	K01139	-	-	-
401	gene21470	2722.83	1178.5	15.8333	7.04833	-1.14256	7.79998e-06	0.00197488	down	IQGAP1	PREDICTED: ras GTPase-activating-like protein IQGAP1 isoform X1 [Ovis aries]	Cellular Processes	Cellular commiunity;Cell motility	ko04810//Regulation of actin cytoskeleton;ko04520//Adherens junction	K16848	GO:0044421//extracellular region part;GO:0005911//cell-cell junction;GO:0005576//extracellular region;GO:0044464//cell part;GO:0044424//intracellular part;GO:0009898//cytoplasmic side of plasma membrane;GO:0043232//intracellular non-membrane-bounded organelle;GO:0043227//membrane-bounded organelle;GO:0015630//microtubule cytoskeleton;GO:0005912//adherens junction;GO:0044425//membrane part;GO:0070…	GO:0019209//kinase activator activity;GO:0005543//phospholipid binding;GO:0051020//GTPase binding;GO:0008289//lipid binding;GO:0019207//kinase regulator activity;GO:0030234//enzyme regulator activity;GO:0035091//phosphatidylinositol binding;GO:0019902//phosphatase binding;GO:0005488//binding;GO:0008047//enzyme activator activity;GO:1901981//phosphatidylinositol phosphate binding;GO:0030295//prote…	GO:0009987//cellular process;GO:0050789//regulation of biological process;GO:0044093//positive regulation of molecular function;GO:0048588//developmental cell growth;GO:0044237//cellular metabolic process;GO:0048731//system development;GO:0042327//positive regulation of phosphorylation;GO:0048869//cellular developmental process;GO:0044700//single organism signaling;GO:0065009//regulation of molec…
402	gene215	0	201.963	0.001	1.66333	10.3554	8.36444e-05	0.00821928	up	LOC105605147	PREDICTED: succinyl-CoA:3-ketoacid coenzyme A transferase 2, mitochondrial isoform X2 [Ovis aries musimon]	Metabolism	Amino acid metabolism;Carbohydrate metabolism;Lipid metabolism	ko00280//Valine, leucine and isoleucine degradation;ko00650//Butanoate metabolism;ko00072//Synthesis and degradation of ketone bodies	K01027	-	GO:0016782//transferase activity, transferring sulfur-containing groups;GO:0003824//catalytic activity;GO:0016740//transferase activity;GO:0008410//CoA-transferase activity	GO:0044248//cellular catabolic process;GO:0008152//metabolic process;GO:0009987//cellular process;GO:0009056//catabolic process;GO:0044237//cellular metabolic process
403	gene21519	116.333	446.333	4.06333	16.3133	1.9215	2.48367e-08	3.69951e-05	up	FAH	PREDICTED: fumarylacetoacetase isoform X1 [Capra hircus]	Metabolism	Amino acid metabolism	ko00350//Tyrosine metabolism	K01555	GO:0031982//vesicle;GO:0044421//extracellular region part;GO:1903561//extracellular vesicle;GO:0043226//organelle;GO:0043230//extracellular organelle;GO:0005576//extracellular region;GO:0043227//membrane-bounded organelle	GO:0003824//catalytic activity;GO:0046914//transition metal ion binding;GO:0016823//hydrolase activity, acting on acid carbon-carbon bonds, in ketonic substances;GO:0016787//hydrolase activity;GO:0005488//binding;GO:0043169//cation binding;GO:0016822//hydrolase activity, acting on acid carbon-carbon bonds;GO:0043167//ion binding;GO:0046872//metal ion binding	GO:0044710//single-organism metabolic process;GO:0044281//small molecule metabolic process;GO:1901360//organic cyclic compound metabolic process;GO:0019752//carboxylic acid metabolic process;GO:0043436//oxoacid metabolic process;GO:0009072//aromatic amino acid family metabolic process;GO:0008152//metabolic process;GO:0006725//cellular aromatic compound metabolic process;GO:0006807//nitrogen compo…
404	gene21566	142.167	37.6667	1.08667	0.296667	-1.89171	9.9918e-05	0.00878382	down	ADAMTS7	PREDICTED: LOW QUALITY PROTEIN: A disintegrin and metalloproteinase with thrombospondin motifs 7 isoform X1, partial [Ovis aries]	-	-	-	-	GO:0031012//extracellular matrix;GO:0005576//extracellular region;GO:0044444//cytoplasmic part;GO:0043226//organelle;GO:0005622//intracellular;GO:0044421//extracellular region part;GO:0044464//cell part;GO:0005783//endoplasmic reticulum;GO:0044422//organelle part;GO:0043229//intracellular organelle;GO:0005737//cytoplasm;GO:0044446//intracellular organelle part;GO:0043231//intracellular membrane-b…	GO:0046914//transition metal ion binding;GO:0005488//binding;GO:0004175//endopeptidase activity;GO:0046872//metal ion binding;GO:0070011//peptidase activity, acting on L-amino acid peptides;GO:0043167//ion binding;GO:0003824//catalytic activity;GO:0008233//peptidase activity;GO:0043169//cation binding;GO:0016787//hydrolase activity	GO:0044723//single-organism carbohydrate metabolic process;GO:0070848//response to growth factor;GO:0016043//cellular component organization;GO:0009101//glycoprotein biosynthetic process;GO:1901576//organic substance biosynthetic process;GO:0006486//protein glycosylation;GO:0034645//cellular macromolecule biosynthetic process;GO:0051216//cartilage development;GO:0001501//skeletal system developme…
405	gene21632	168.078	447.385	3.035	8.07333	1.60625	0.000521568	0.0216606	up	CYP1A1	cytochrome P450 1A1 [Ovis aries]	Organismal Systems;Metabolism	Xenobiotics biodegradation and metabolism;Metabolism of cofactors and vitamins;Amino acid metabolism;Endocrine system;Lipid metabolism	ko00140//Steroid hormone biosynthesis;ko00830//Retinol metabolism;ko00980//Metabolism of xenobiotics by cytochrome P450;ko04913//Ovarian Steroidogenesis;ko00380//Tryptophan metabolism	K07408	GO:0016020//membrane;GO:0044464//cell part;GO:0043231//intracellular membrane-bounded organelle;GO:0042175//nuclear outer membrane-endoplasmic reticulum membrane network;GO:0012505//endomembrane system;GO:0005622//intracellular;GO:0005623//cell;GO:0043226//organelle;GO:0044424//intracellular part;GO:0043229//intracellular organelle;GO:0043227//membrane-bounded organelle	GO:0046914//transition metal ion binding;GO:0046906//tetrapyrrole binding;GO:0046872//metal ion binding;GO:0016712//oxidoreductase activity, acting on paired donors, with incorporation or reduction of molecular oxygen, reduced flavin or flavoprotein as one donor, and incorporation of one atom of oxygen;GO:1901363//heterocyclic compound binding;GO:0016705//oxidoreductase activity, acting on paired…	GO:0071704//organic substance metabolic process;GO:0042221//response to chemical;GO:0006807//nitrogen compound metabolic process;GO:0010033//response to organic substance;GO:0072593//reactive oxygen species metabolic process;GO:0008152//metabolic process;GO:0014070//response to organic cyclic compound;GO:0019748//secondary metabolic process;GO:0042743//hydrogen peroxide metabolic process;GO:00446…
406	gene21658	19.6117	64.6233	4.15333	13.88	1.782	0.000674459	0.0248834	up	LOC105603299	PREDICTED: granzyme H-like, partial [Ovis aries]	-	-	-	-	-	GO:0070011//peptidase activity, acting on L-amino acid peptides;GO:0003824//catalytic activity;GO:0008233//peptidase activity;GO:0016787//hydrolase activity;GO:0004175//endopeptidase activity	GO:0044238//primary metabolic process;GO:0008152//metabolic process;GO:0019538//protein metabolic process;GO:0071704//organic substance metabolic process;GO:0043170//macromolecule metabolic process
407	gene21775	0	41.5	0.001	0.631667	8.07913	0.000633654	0.0239151	up	FSCB	PREDICTED: fibrous sheath CABYR-binding protein [Ovis aries]	-	-	-	-	GO:0042995//cell projection;GO:0044464//cell part;GO:0005623//cell	-	-
408	gene2179	526.667	117.5	9.81333	2.205	-2.08389	5.46405e-05	0.00673575	down	ADIPOQ	PREDICTED: adiponectin isoform X2 [Ovis aries]	Organismal Systems;Environmental Information Processing	Signal transduction;Endocrine system	ko04152//AMPK signaling pathway;ko04920//Adipocytokine signaling pathway;ko03320//PPAR signaling pathway	K07296	GO:0044444//cytoplasmic part;GO:0005623//cell;GO:0032991//macromolecular complex;GO:0043229//intracellular organelle;GO:0044421//extracellular region part;GO:0043230//extracellular organelle;GO:0043226//organelle;GO:0044424//intracellular part;GO:0043231//intracellular membrane-bounded organelle;GO:0005737//cytoplasm;GO:0043227//membrane-bounded organelle;GO:0005576//extracellular region;GO:00319…	GO:0046983//protein dimerization activity;GO:0005102//receptor binding;GO:0043167//ion binding;GO:0043168//anion binding;GO:0005515//protein binding;GO:0031406//carboxylic acid binding;GO:0005488//binding	GO:0009725//response to hormone;GO:0022408//negative regulation of cell-cell adhesion;GO:0010562//positive regulation of phosphorus metabolic process;GO:0033500//carbohydrate homeostasis;GO:0010874//regulation of cholesterol efflux;GO:0051050//positive regulation of transport;GO:0030154//cell differentiation;GO:0002683//negative regulation of immune system process;GO:0010742//macrophage derived f…
409	gene21841	0	25.3333	0.001	0.733333	7.39971	0.000649734	0.0242025	up	FAM181A	PREDICTED: protein FAM181A isoform X3 [Ovis aries]	-	-	-	-	-	-	-
410	gene21844	2.83333	72.8333	0.161667	4.25333	4.3608	0.000782175	0.0273065	up	OTUB2	PREDICTED: ubiquitin thioesterase OTUB2 [Ovis aries]	-	-	-	-	-	-	-
411	gene21860	1.66667	169.5	0.035	3.74	6.27079	3.09399e-05	0.00476869	up	SERPINA5	PREDICTED: plasma serine protease inhibitor [Ovis aries]	Organismal Systems	Immune system	ko04610//Complement and coagulation cascades	K03913	-	-	-
412	gene21911	1487.33	363	48.2383	12.76	-1.91881	2.34949e-11	2.62473e-07	down	GTL2	-	-	-	-	-	-	-	-
413	gene21918	28.205	5.66833	0.1	0.02	-2.18003	0.000215514	0.013488	down	LOC105606646	-	-	-	-	-	-	-	-
414	gene21976	1	128.5	0.0733333	10.2017	6.56866	7.82377e-05	0.00805135	up	LOC101120198	PREDICTED: basic proline-rich protein-like isoform X2 [Canis lupus familiaris]	-	-	-	-	-	-	-
415	gene21977	0.333333	68.1667	0.0766667	16.2217	6.93254	0.000395549	0.018645	up	LOC105601897	-	-	-	-	-	-	-	-
416	gene21996	180.107	568.28	3.085	10.025	1.68741	0.000857524	0.0287682	up	TNFAIP2	PREDICTED: tumor necrosis factor alpha-induced protein 2 [Pantholops hodgsonii]	-	-	-	-	-	-	-
417	gene22023	519	177.667	4.70833	1.69333	-1.47074	2.23209e-09	6.23395e-06	down	INF2	PREDICTED: inverted formin-2 isoform X4 [Ovis aries musimon]	-	-	-	-	GO:0005623//cell;GO:0005737//cytoplasm;GO:0044464//cell part;GO:0044444//cytoplasmic part;GO:0005622//intracellular;GO:0044424//intracellular part	GO:0005488//binding;GO:0051020//GTPase binding;GO:0005515//protein binding;GO:0031267//small GTPase binding;GO:0017016//Ras GTPase binding;GO:0019899//enzyme binding	GO:0006996//organelle organization;GO:0071840//cellular component organization or biogenesis;GO:0007010//cytoskeleton organization;GO:0000266//mitochondrial fission;GO:0016043//cellular component organization;GO:0007005//mitochondrion organization;GO:0048285//organelle fission;GO:0009987//cellular process
418	gene22087	22	108.5	0.181667	0.92	2.1951	0.000454242	0.0202577	up	OSBPL10	PREDICTED: oxysterol-binding protein-related protein 10 isoform X1 [Ovis aries]	-	-	-	-	-	GO:0097159//organic cyclic compound binding;GO:0032934//sterol binding;GO:0008289//lipid binding;GO:0005496//steroid binding;GO:0005488//binding	-
419	gene22151	89671.2	19306.5	703.87	153.567	-2.02542	1.31853e-05	0.00275326	down	XIRP1	PREDICTED: LOW QUALITY PROTEIN: xin actin-binding repeat-containing protein 1 isoform X1 [Ovis aries]	-	-	-	-	-	-	-
420	gene22176	0	23.8333	0.001	1.46833	7.2853	0.00160095	0.0410678	up	LYZL4	PREDICTED: lysozyme-like protein 4 isoform X1 [Ovis aries]	-	-	-	-	GO:0044425//membrane part;GO:0005623//cell;GO:0043227//membrane-bounded organelle;GO:0043226//organelle;GO:0031224//intrinsic component of membrane;GO:0044464//cell part;GO:0044424//intracellular part;GO:0005622//intracellular;GO:0016020//membrane;GO:0043229//intracellular organelle;GO:0043231//intracellular membrane-bounded organelle	-	-
421	gene22210	1.16667	49.3333	0.0633333	2.575	5.02608	0.00117854	0.0341533	up	LOC101119258	PREDICTED: formin-1-like isoform X1 [Ovis aries]	-	-	-	-	-	-	-
422	gene22223	0	50.5	0.001	1.71167	8.36076	0.000466905	0.0205356	up	FANCD2OS	PREDICTED: FANCD2 opposite strand protein [Ovis aries]	-	-	-	-	-	-	-
423	gene22269	238.167	90.6667	1.03	0.401667	-1.35996	3.87067e-05	0.00561573	down	ITPR1	PREDICTED: inositol 1,4,5-trisphosphate receptor type 1 isoform X2 [Ovis aries]	Cellular Processes;Organismal Systems;Environmental Information Processing	Cellular commiunity;Nervous system;Cell growth and death;Sensory system;Digestive system;Circulatory system;Endocrine system;Signal transduction;Immune system;Environmental adaptation	ko04020//Calcium signaling pathway;ko04022//cGMP - PKG signaling pathway;ko04921//Oxytocin signaling pathway;ko04270//Vascular smooth muscle contraction;ko04611//Platelet activation;ko04728//Dopaminergic synapse;ko04114//Oocyte meiosis;ko04726//Serotonergic synapse;ko04750//Inflammatory mediator regulation of TRP channels;ko04725//Cholinergic synapse;ko04724//Glutamatergic synapse;ko04723//Retrog…	K04958	GO:0016023//cytoplasmic, membrane-bounded vesicle;GO:0031967//organelle envelope;GO:0044424//intracellular part;GO:0031981//nuclear lumen;GO:0030141//secretory granule;GO:0005634//nucleus;GO:0031982//vesicle;GO:0016020//membrane;GO:0008287//protein serine/threonine phosphatase complex;GO:0045202//synapse;GO:0044422//organelle part;GO:0032991//macromolecular complex;GO:0031090//organelle membrane;…	GO:0015075//ion transmembrane transporter activity;GO:0022891//substrate-specific transmembrane transporter activity;GO:0005246//calcium channel regulator activity;GO:0015276//ligand-gated ion channel activity;GO:0016247//channel regulator activity;GO:0005488//binding;GO:0005543//phospholipid binding;GO:0072509//divalent inorganic cation transmembrane transporter activity;GO:0004872//receptor act…	GO:0034976//response to endoplasmic reticulum stress;GO:0009987//cellular process;GO:0048519//negative regulation of biological process;GO:0044763//single-organism cellular process;GO:0042044//fluid transport;GO:0044700//single organism signaling;GO:0019932//second-messenger-mediated signaling;GO:0006810//transport;GO:0050794//regulation of cellular process;GO:0051234//establishment of localizati…
424	gene22329	513.5	244.833	2.99167	1.45667	-1.00807	8.57276e-05	0.00824897	down	ADAMTS9	PREDICTED: A disintegrin and metalloproteinase with thrombospondin motifs 9 isoform X5 [Ovis aries musimon]	-	-	-	-	GO:0044421//extracellular region part;GO:0044464//cell part;GO:0005576//extracellular region;GO:0005623//cell;GO:0031012//extracellular matrix	GO:0016787//hydrolase activity;GO:0043169//cation binding;GO:0070011//peptidase activity, acting on L-amino acid peptides;GO:0005488//binding;GO:0046914//transition metal ion binding;GO:0008233//peptidase activity;GO:0004175//endopeptidase activity;GO:0043167//ion binding;GO:0003824//catalytic activity;GO:0046872//metal ion binding	GO:0008152//metabolic process;GO:0030154//cell differentiation;GO:0044767//single-organism developmental process;GO:0043473//pigmentation;GO:0044238//primary metabolic process;GO:0009987//cellular process;GO:0048869//cellular developmental process;GO:0071704//organic substance metabolic process;GO:0043170//macromolecule metabolic process;GO:0050931//pigment cell differentiation;GO:0048066//develo…
425	gene22370	915.667	355.333	4.76167	1.88667	-1.25849	1.65827e-05	0.00308891	down	FLNB	PREDICTED: LOW QUALITY PROTEIN: filamin-B isoform X1 [Ovis aries]	Cellular Processes;Environmental Information Processing	Cellular commiunity;Signal transduction	ko04010//MAPK signaling pathway;ko04510//Focal adhesion	K04437	GO:0031982//vesicle;GO:0043227//membrane-bounded organelle;GO:0043226//organelle;GO:0044464//cell part;GO:0005912//adherens junction;GO:0005924//cell-substrate adherens junction;GO:0044421//extracellular region part;GO:0044424//intracellular part;GO:0030055//cell-substrate junction;GO:0005623//cell;GO:0070161//anchoring junction;GO:0016020//membrane;GO:0005576//extracellular region;GO:0043230//ex…	GO:1901363//heterocyclic compound binding;GO:0003723//RNA binding;GO:0005515//protein binding;GO:0008092//cytoskeletal protein binding;GO:0097159//organic cyclic compound binding;GO:0003676//nucleic acid binding;GO:0005488//binding	GO:0009987//cellular process;GO:0032989//cellular component morphogenesis;GO:0006996//organelle organization;GO:0030154//cell differentiation;GO:0030855//epithelial cell differentiation;GO:0048468//cell development;GO:0044763//single-organism cellular process;GO:0060537//muscle tissue development;GO:0048869//cellular developmental process;GO:0060429//epithelium development;GO:0071840//cellular co…
426	gene22430	89	336	1.77167	7.03167	1.78322	0.00110659	0.032966	up	PHF7	PREDICTED: LOW QUALITY PROTEIN: PHD finger protein 7 [Ovis aries]	-	-	-	-	GO:0005634//nucleus;GO:0015630//microtubule cytoskeleton;GO:0043229//intracellular organelle;GO:0031981//nuclear lumen;GO:0005622//intracellular;GO:0044446//intracellular organelle part;GO:0044428//nuclear part;GO:0043228//non-membrane-bounded organelle;GO:0005856//cytoskeleton;GO:0043232//intracellular non-membrane-bounded organelle;GO:0043226//organelle;GO:0044422//organelle part;GO:0070013//in…	GO:0043169//cation binding;GO:0043167//ion binding;GO:0005488//binding;GO:0046914//transition metal ion binding;GO:0046872//metal ion binding	-
427	gene22454	3.16667	424.333	0.243333	34.925	6.78602	6.27503e-05	0.00711691	up	LOC101115577	PREDICTED: IQ domain-containing protein F1 [Ovis aries]	-	-	-	-	GO:0016023//cytoplasmic, membrane-bounded vesicle;GO:0005622//intracellular;GO:0044464//cell part;GO:0043227//membrane-bounded organelle;GO:0005623//cell;GO:0044444//cytoplasmic part;GO:0043226//organelle;GO:0031410//cytoplasmic vesicle;GO:0043231//intracellular membrane-bounded organelle;GO:0043229//intracellular organelle;GO:0044424//intracellular part;GO:0030141//secretory granule;GO:0099503//…	GO:0005515//protein binding;GO:0005488//binding	GO:0044703//multi-organism reproductive process;GO:0007340//acrosome reaction;GO:0009566//fertilization;GO:0044699//single-organism process;GO:0000003//reproduction;GO:0019953//sexual reproduction;GO:0051704//multi-organism process;GO:0007338//single fertilization;GO:0022414//reproductive process;GO:0044702//single organism reproductive process
428	gene22455	0.166667	113	0.0183333	13.3967	8.28256	0.000207543	0.0131737	up	LOC101115831	PREDICTED: IQ domain-containing protein F5 [Ovis aries]	-	-	-	-	-	-	-
429	gene22456	0	29.8333	0.001	1.425	7.60627	0.00110468	0.0329532	up	IQCF2	PREDICTED: IQ domain-containing protein F2 isoform X8 [Ovis aries]	-	-	-	-	-	-	-
430	gene22458	0	33.3333	0.001	1.34833	7.76915	0.000535939	0.0220214	up	LOC101116353	PREDICTED: IQ domain-containing protein F3 [Ovis aries]	-	-	-	-	-	-	-
431	gene22459	0	53.7383	0.001	2.37333	8.44809	0.000423337	0.0193731	up	LOC101113891	PREDICTED: LOW QUALITY PROTEIN: IQ domain-containing protein F5-like isoform X1 [Ovis aries]	-	-	-	-	-	-	-
432	gene22478	50.8333	126	1.05333	2.70667	1.34724	0.00121153	0.0347016	up	C19H3orf18	g20 protein [Homo sapiens]	-	-	-	-	-	-	-
433	gene22484	13.5	239	0.365	6.89167	3.89115	0.000249002	0.0145673	up	ZMYND10	PREDICTED: zinc finger MYND domain-containing protein 10 isoform X1 [Ovis aries]	-	-	-	-	-	GO:0043167//ion binding;GO:0043169//cation binding;GO:0005488//binding	GO:0022607//cellular component assembly;GO:0032502//developmental process;GO:0048646//anatomical structure formation involved in morphogenesis;GO:0044767//single-organism developmental process;GO:0044699//single-organism process;GO:0070271//protein complex biogenesis;GO:0030031//cell projection assembly;GO:0044085//cellular component biogenesis;GO:0060271//cilium morphogenesis;GO:0048856//anatomi…
434	gene22494	64.3333	204.333	1.02667	3.365	1.63697	8.71123e-05	0.00825899	up	SLC38A3	PREDICTED: sodium-coupled neutral amino acid transporter 3 isoform X2 [Ovis aries musimon]	Organismal Systems	Nervous system;Excretory system	ko04724//Glutamatergic synapse;ko04727//GABAergic synapse;ko04964//Proximal tubule bicarbonate reclamation	K13576	-	-	-
435	gene22523	3804.83	1106.17	237.152	71.9883	-1.64163	3.2594e-07	0.000227577	down	GPX1	PREDICTED: LOW QUALITY PROTEIN: glutathione peroxidase 1 [Ovis aries]	Organismal Systems;Metabolism	Metabolism of other amino acids;Endocrine system;Lipid metabolism	ko00590//Arachidonic acid metabolism;ko04918//Thyroid hormone synthesis;ko00480//Glutathione metabolism	K00432	GO:0043227//membrane-bounded organelle;GO:0044424//intracellular part;GO:0016234//inclusion body;GO:0044421//extracellular region part;GO:0044464//cell part;GO:0005576//extracellular region;GO:0043229//intracellular organelle;GO:0043231//intracellular membrane-bounded organelle;GO:0043230//extracellular organelle;GO:1903561//extracellular vesicle;GO:0005622//intracellular;GO:0005623//cell;GO:0043…	GO:0019904//protein domain specific binding;GO:0016209//antioxidant activity;GO:0016684//oxidoreductase activity, acting on peroxide as acceptor;GO:0003824//catalytic activity;GO:0004601//peroxidase activity;GO:0005515//protein binding;GO:0016491//oxidoreductase activity;GO:0005488//binding	GO:0097190//apoptotic signaling pathway;GO:0016043//cellular component organization;GO:0006996//organelle organization;GO:0008152//metabolic process;GO:0051146//striated muscle cell differentiation;GO:0034599//cellular response to oxidative stress;GO:0001568//blood vessel development;GO:0042221//response to chemical;GO:0008015//blood circulation;GO:0060537//muscle tissue development;GO:0007165//s…
436	gene22553	0	24.1667	0.001	2.495	7.30514	0.001577	0.0406638	up	TMEM89	PREDICTED: transmembrane protein 89 [Ovis aries]	-	-	-	-	GO:0031224//intrinsic component of membrane;GO:0044425//membrane part;GO:0016020//membrane	-	-
437	gene22557	2558.5	8904.33	34.8833	125.167	1.79876	4.44208e-06	0.00134911	up	PFKFB4	6-phosphofructo-2-kinase/fructose-2,6-bisphosphatase 4 [Bos taurus]	Environmental Information Processing;Metabolism	Signal transduction;Carbohydrate metabolism	ko04152//AMPK signaling pathway;ko00051//Fructose and mannose metabolism	K19030	-	-	-
438	gene22600	0	97	0.001	3.15	9.29905	0.000194327	0.0127274	up	LOC101115913	PREDICTED: serine protease 45 [Ovis aries]	-	-	-	-	-	-	-
439	gene22601	0	43.6667	0.001	1.04667	8.15485	0.000321399	0.0164188	up	LOC101102765	PREDICTED: serine protease 46-like [Capra hircus]	-	-	-	-	GO:0044425//membrane part;GO:0016020//membrane;GO:0031224//intrinsic component of membrane	-	GO:0044238//primary metabolic process;GO:0043170//macromolecule metabolic process;GO:0071704//organic substance metabolic process;GO:0008152//metabolic process;GO:0019538//protein metabolic process
440	gene22623	36.3333	5.16667	0.763333	0.101667	-2.67977	0.000332909	0.0166232	down	CCR9	C-C chemokine receptor type 9 [Ovis aries]	Organismal Systems;Environmental Information Processing	Immune system;Signaling molecules and interaction	ko04060//Cytokine-cytokine receptor interaction;ko04062//Chemokine signaling pathway;ko04672//Intestinal immune network for IgA production	K04184	GO:0044464//cell part;GO:0016020//membrane;GO:0031224//intrinsic component of membrane;GO:0044425//membrane part;GO:0005623//cell	GO:0008528//G-protein coupled peptide receptor activity;GO:0004888//transmembrane signaling receptor activity;GO:0001637//G-protein coupled chemoattractant receptor activity;GO:0099600//transmembrane receptor activity;GO:0004872//receptor activity;GO:0060089//molecular transducer activity;GO:0004871//signal transducer activity;GO:0004896//cytokine receptor activity;GO:0004930//G-protein coupled r…	GO:0044700//single organism signaling;GO:0034097//response to cytokine;GO:0023052//signaling;GO:0071345//cellular response to cytokine stimulus;GO:0050896//response to stimulus;GO:0071310//cellular response to organic substance;GO:0019221//cytokine-mediated signaling pathway;GO:0009987//cellular process;GO:0007166//cell surface receptor signaling pathway;GO:0010033//response to organic substance;…
441	gene22655	12.3333	0.833333	0.236667	0.015	-3.52404	0.0016586	0.0417567	down	TRH	PREDICTED: LOW QUALITY PROTEIN: thyrotropin releasing hormone isoform X2 [Ovis aries musimon]	Environmental Information Processing	Signaling molecules and interaction	ko04080//Neuroactive ligand-receptor interaction	K05253	-	-	-
442	gene22659	1165.17	477.5	8.91833	3.785	-1.19587	3.72537e-06	0.00122406	down	PLXND1	PREDICTED: LOW QUALITY PROTEIN: plexin-D1 isoform X1 [Ovis aries]	-	-	-	-	-	-	-
443	gene22757	122.167	24.3333	1.30667	0.271667	-2.11981	7.75293e-05	0.00805135	down	COL21A1	PREDICTED: collagen alpha-1(XXI) chain isoform X1 [Ovis aries]	Organismal Systems	Digestive system	ko04974//Protein digestion and absorption	K16629	-	-	-
444	gene22834	1	248.5	0.0216667	5.84167	7.50185	0.000244227	0.0145513	up	TCP11	PREDICTED: T-complex protein 11 homolog isoform X2 [Ovis aries musimon]	-	-	-	-	-	-	-
445	gene2285	0	31.3333	0.001	0.748333	7.67648	0.00102129	0.0313228	up	SPATA16	PREDICTED: spermatogenesis-associated protein 16 isoform X1 [Ovis aries]	-	-	-	-	-	-	GO:0044699//single-organism process;GO:0044703//multi-organism reproductive process;GO:0019953//sexual reproduction;GO:0007276//gamete generation;GO:0032504//multicellular organism reproduction;GO:0051704//multi-organism process;GO:0044702//single organism reproductive process;GO:0032501//multicellular organismal process;GO:0022414//reproductive process;GO:0048232//male gamete generation;GO:00486…
446	gene22858	5	78.6667	0.0566667	0.953333	3.71145	0.00180208	0.0439084	up	SLC26A8	PREDICTED: testis anion transporter 1 isoform X1 [Ovis aries]	-	-	-	-	-	-	-
447	gene22885	0	21.6667	0.001	0.656667	7.14926	0.00191992	0.0455135	up	TMEM217	PREDICTED: transmembrane protein 217 isoform X1 [Ovis aries]	-	-	-	-	-	-	-
448	gene22913	0	32.1667	0.001	2.15	7.71405	0.000978391	0.0306595	up	LOC105603693	-	-	-	-	-	-	-	-
449	gene22927	0	63.8333	0.001	2.13	8.6973	0.000333137	0.0166232	up	LOC105603703	1700067P10Rik protein [Mus musculus]	-	-	-	-	-	-	-
450	gene22943	14.1667	3	0.123333	0.0283333	-2.19944	0.00129798	0.0363874	down	GUCA1A	PREDICTED: guanylyl cyclase-activating protein 1 isoform X1 [Ovis aries]	Organismal Systems	Sensory system	ko04740//Olfactory transduction;ko04744//Phototransduction	K08328	GO:0016020//membrane	GO:0043169//cation binding;GO:0098772//molecular function regulator;GO:0008047//enzyme activator activity;GO:0046872//metal ion binding;GO:0030249//guanylate cyclase regulator activity;GO:0030250//guanylate cyclase activator activity;GO:0010851//cyclase regulator activity;GO:0043167//ion binding;GO:0030234//enzyme regulator activity;GO:0010853//cyclase activator activity;GO:0005488//binding	GO:1900544//positive regulation of purine nucleotide metabolic process;GO:0030823//regulation of cGMP metabolic process;GO:0030808//regulation of nucleotide biosynthetic process;GO:0045935//positive regulation of nucleobase-containing compound metabolic process;GO:0030828//positive regulation of cGMP biosynthetic process;GO:0051716//cellular response to stimulus;GO:0031328//positive regulation of…
451	gene22976	2.5	78	0.101667	3.41167	4.66626	0.000838605	0.0285176	up	LRRC73	PREDICTED: leucine-rich repeat-containing protein 73 isoform X2 [Ovis aries musimon]	-	-	-	-	-	-	-
452	gene22991	1	82.6667	0.0166667	1.46	5.86922	0.000615798	0.023722	up	CAPN11	PREDICTED: calpain-11 isoform X1 [Ovis aries]	-	-	-	-	GO:0044464//cell part;GO:0005623//cell	GO:0008233//peptidase activity;GO:0005488//binding;GO:0003824//catalytic activity;GO:0004197//cysteine-type endopeptidase activity;GO:0004175//endopeptidase activity;GO:0070011//peptidase activity, acting on L-amino acid peptides;GO:0043167//ion binding;GO:0016787//hydrolase activity;GO:0008234//cysteine-type peptidase activity;GO:0043169//cation binding;GO:0046872//metal ion binding	GO:0044238//primary metabolic process;GO:0008152//metabolic process;GO:0019538//protein metabolic process;GO:0071704//organic substance metabolic process;GO:0043170//macromolecule metabolic process
453	gene22998	0.833333	40	0.00666667	0.346667	5.12902	0.00100341	0.0310516	up	TCTE1	PREDICTED: T-complex-associated testis-expressed protein 1 isoform X1 [Ovis aries]	-	-	-	-	-	-	-
454	gene23000	7.83333	37.3333	0.06	0.311667	2.15341	0.00190741	0.0454703	up	SPATS1	PREDICTED: spermatogenesis-associated serine-rich protein 1 isoform X1 [Ovis aries]	-	-	-	-	-	-	-
455	gene23037	0	166.5	0.001	6.235	10.0778	5.40746e-05	0.00673575	up	CRISP2	PREDICTED: cysteine-rich secretory protein 2 isoform X1 [Ovis aries]	-	-	-	-	-	-	-
456	gene23040	0	163	0.001	4.48	10.0472	5.52337e-05	0.00673575	up	PGK2	PREDICTED: phosphoglycerate kinase 2 [Ovis aries]	Metabolism	Global and Overview;Carbohydrate metabolism	ko01200//Carbon metabolism;ko01230//Biosynthesis of amino acids;ko00010//Glycolysis / Gluconeogenesis	K00927	-	-	-
457	gene23061	683.833	1422	32.4217	69.33	1.15484	8.80215e-05	0.00829817	up	GSTA1-1	PREDICTED: glutathione S-transferase A2 [Ovis aries]	Metabolism	Xenobiotics biodegradation and metabolism;Metabolism of other amino acids	ko00980//Metabolism of xenobiotics by cytochrome P450;ko00982//Drug metabolism - cytochrome P450;ko00480//Glutathione metabolism	K00799	GO:0005622//intracellular;GO:0005623//cell;GO:0044424//intracellular part;GO:0044464//cell part	GO:0003824//catalytic activity;GO:0016765//transferase activity, transferring alkyl or aryl (other than methyl) groups;GO:0016740//transferase activity	GO:0006790//sulfur compound metabolic process;GO:0009987//cellular process;GO:0008152//metabolic process;GO:0044237//cellular metabolic process
458	gene23072	116.897	345.677	5.735	16.4933	1.82358	0.00219309	0.0497458	up	LOC101108696	PREDICTED: SLA class II histocompatibility antigen, DQ haplotype D alpha chain-like isoform X1 [Ovis aries]	Organismal Systems;Cellular Processes;Environmental Information Processing	Immune system;Transport and catabolism;Signaling molecules and interaction	ko04145//Phagosome;ko04514//Cell adhesion molecules (CAMs);ko04612//Antigen processing and presentation;ko04672//Intestinal immune network for IgA production	K06752	GO:0071944//cell periphery;GO:0044459//plasma membrane part;GO:0042611//MHC protein complex;GO:0098797//plasma membrane protein complex;GO:0005623//cell;GO:0031224//intrinsic component of membrane;GO:0098796//membrane protein complex;GO:0032991//macromolecular complex;GO:0043234//protein complex;GO:0044425//membrane part;GO:0044464//cell part;GO:0016020//membrane;GO:0005886//plasma membrane	-	GO:0019882//antigen processing and presentation;GO:0002376//immune system process
459	gene23160	57.3333	168.333	4.08167	11.7233	1.49182	0.0020169	0.0467529	up	AIF1	PREDICTED: allograft inflammatory factor 1 isoform X1 [Ovis aries]	-	-	-	-	GO:0005623//cell;GO:0043226//organelle;GO:0071944//cell periphery;GO:0005622//intracellular;GO:0005856//cytoskeleton;GO:0043232//intracellular non-membrane-bounded organelle;GO:0005886//plasma membrane;GO:0042995//cell projection;GO:0044464//cell part;GO:0005737//cytoplasm;GO:0044444//cytoplasmic part;GO:0031252//cell leading edge;GO:0001726//ruffle;GO:0043229//intracellular organelle;GO:0043227/…	GO:0043169//cation binding;GO:0005488//binding;GO:0005515//protein binding;GO:0043167//ion binding;GO:0003779//actin binding;GO:0046872//metal ion binding;GO:0008092//cytoskeletal protein binding	GO:0050896//response to stimulus;GO:0070661//leukocyte proliferation;GO:0007165//signal transduction;GO:0065007//biological regulation;GO:0002684//positive regulation of immune system process;GO:0007265//Ras protein signal transduction;GO:1903047//mitotic cell cycle process;GO:0009987//cellular process;GO:0050789//regulation of biological process;GO:0009605//response to external stimulus;GO:00069…
460	gene2321	3.33333	58.1667	0.108333	1.995	3.80288	0.00177505	0.0434868	up	ACTRT3	PREDICTED: actin-related protein T3 [Ovis aries]	-	-	-	-	-	-	-
461	gene2335	263.333	121.167	2.78333	1.32	-1.03765	0.000271246	0.0151133	down	GOLIM4	PREDICTED: Golgi integral membrane protein 4 isoform X2 [Ovis aries musimon]	-	-	-	-	GO:0044424//intracellular part;GO:0044425//membrane part;GO:0043227//membrane-bounded organelle;GO:0005623//cell;GO:0044464//cell part;GO:0043231//intracellular membrane-bounded organelle;GO:0043229//intracellular organelle;GO:0043226//organelle;GO:0005622//intracellular;GO:0016020//membrane;GO:0031224//intrinsic component of membrane	-	-
462	gene23408	0	100.307	0.001	15.4233	9.34767	0.000186188	0.0124925	up	LOC101119426	histone H2B type 1-C/E/F/G/I [Homo sapiens]	-	-	-	-	-	-	-
463	gene23454	0	31.6667	0.001	0.398333	7.69162	0.000999828	0.0310198	up	POM121L2	PREDICTED: POM121-like protein 2 [Ovis aries]	Genetic Information Processing	Translation	ko03013//RNA transport	K14316	-	-	-
464	gene23543	749.338	101.003	46.57	6.565	-2.81022	8.77777e-23	1.96122e-18	down	LOC101109397	PREDICTED: histone H1.3 [Ovis aries]	-	-	-	-	GO:0043232//intracellular non-membrane-bounded organelle;GO:0043228//non-membrane-bounded organelle;GO:0043231//intracellular membrane-bounded organelle;GO:0043226//organelle;GO:0044424//intracellular part;GO:0005622//intracellular;GO:0043229//intracellular organelle;GO:0043227//membrane-bounded organelle;GO:0005623//cell;GO:0044464//cell part	GO:0003676//nucleic acid binding;GO:1901363//heterocyclic compound binding;GO:0097159//organic cyclic compound binding;GO:0005488//binding	GO:0016043//cellular component organization;GO:0043933//macromolecular complex subunit organization;GO:0071822//protein complex subunit organization;GO:0009987//cellular process;GO:0071824//protein-DNA complex subunit organization;GO:0071840//cellular component organization or biogenesis;GO:0034728//nucleosome organization;GO:0006325//chromatin organization
465	gene23549	8.83333	1.26667	0.405	0.0566667	-2.51498	0.00220623	0.0498422	down	LOC105603814	PREDICTED: histone H3.1 [Ovis aries]	-	-	-	-	GO:0031982//vesicle;GO:0032993//protein-DNA complex;GO:0000785//chromatin;GO:0005576//extracellular region;GO:0098687//chromosomal region;GO:0044446//intracellular organelle part;GO:0000786//nucleosome;GO:1903561//extracellular vesicle;GO:0043233//organelle lumen;GO:0044815//DNA packaging complex;GO:0043229//intracellular organelle;GO:0043228//non-membrane-bounded organelle;GO:0043226//organelle;…	GO:0097159//organic cyclic compound binding;GO:1901363//heterocyclic compound binding;GO:0003676//nucleic acid binding;GO:0005488//binding;GO:0005515//protein binding;GO:0046983//protein dimerization activity	GO:0009892//negative regulation of metabolic process;GO:0065008//regulation of biological quality;GO:0043900//regulation of multi-organism process;GO:0050688//regulation of defense response to virus;GO:0006996//organelle organization;GO:0010629//negative regulation of gene expression;GO:0006914//autophagy;GO:0034728//nucleosome organization;GO:0050789//regulation of biological process;GO:0006323/…
466	gene23550	25.8283	5.16667	0.823333	0.17	-2.26282	0.000223384	0.0137117	down	LOC101109652	PREDICTED: histone H1.4-like [Ovis aries]	-	-	-	-	GO:0043228//non-membrane-bounded organelle;GO:0043233//organelle lumen;GO:0000228//nuclear chromosome;GO:0043229//intracellular organelle;GO:0044427//chromosomal part;GO:0031974//membrane-enclosed lumen;GO:0043231//intracellular membrane-bounded organelle;GO:0043232//intracellular non-membrane-bounded organelle;GO:0044424//intracellular part;GO:0044446//intracellular organelle part;GO:0032991//ma…	GO:0003682//chromatin binding;GO:0003676//nucleic acid binding;GO:0005488//binding;GO:0097159//organic cyclic compound binding;GO:1901363//heterocyclic compound binding;GO:0003723//RNA binding;GO:0044877//macromolecular complex binding	GO:0034654//nucleobase-containing compound biosynthetic process;GO:0010467//gene expression;GO:0018023//peptidyl-lysine trimethylation;GO:0009058//biosynthetic process;GO:0043412//macromolecule modification;GO:0016043//cellular component organization;GO:0071824//protein-DNA complex subunit organization;GO:0018205//peptidyl-lysine modification;GO:0044260//cellular macromolecule metabolic process;G…
467	gene23556	68.6667	5.16667	5.47667	0.443333	-3.60135	1.09791e-10	8.17689e-07	down	LOC101111669	histone H2A type 1-C [Homo sapiens]	-	-	-	-	-	-	-
468	gene23557	82.8333	8.83333	1.4	0.156667	-3.12685	1.49001e-07	0.000134921	down	LOC101111915	histone H2B type 1-C/E/F/G/I [Homo sapiens]	-	-	-	-	-	-	-
469	gene23558	88.1667	1.16667	1.63833	0.0233333	-5.95751	5.78118e-10	2.98742e-06	down	LOC101112356	PREDICTED: histone H1t [Ovis aries]	-	-	-	-	-	-	-
470	gene23565	11.6667	1.16667	0.085	0.01	-3.10239	0.000456179	0.0202927	down	LOC105603813	-	-	-	-	-	-	-	-
471	gene23566	55.1667	12.1667	1.81333	0.425	-2.07453	5.07068e-05	0.00658361	down	LOC101112606	histone H4 [Homo sapiens]	-	-	-	-	GO:0044421//extracellular region part;GO:0000781//chromosome, telomeric region;GO:0070013//intracellular organelle lumen;GO:0098687//chromosomal region;GO:0043229//intracellular organelle;GO:0005634//nucleus;GO:0044427//chromosomal part;GO:0043233//organelle lumen;GO:0044446//intracellular organelle part;GO:0043228//non-membrane-bounded organelle;GO:0031974//membrane-enclosed lumen;GO:0043231//in…	GO:0046983//protein dimerization activity;GO:0097159//organic cyclic compound binding;GO:1901363//heterocyclic compound binding;GO:0005488//binding;GO:0005515//protein binding;GO:0003676//nucleic acid binding;GO:0003723//RNA binding	GO:0030099//myeloid cell differentiation;GO:0097659//nucleic acid-templated transcription;GO:0022607//cellular component assembly;GO:0032200//telomere organization;GO:0044767//single-organism developmental process;GO:0009893//positive regulation of metabolic process;GO:0019438//aromatic compound biosynthetic process;GO:0034622//cellular macromolecular complex assembly;GO:0034728//nucleosome organ…
472	gene23621	0	209	0.001	5.43167	10.4047	3.56405e-05	0.00527361	up	HDGFL1	PREDICTED: hepatoma-derived growth factor-like protein 1 isoform X2 [Ovis aries musimon]	-	-	-	-	GO:0005634//nucleus;GO:0044464//cell part;GO:0044424//intracellular part;GO:0044422//organelle part;GO:0043234//protein complex;GO:0043227//membrane-bounded organelle;GO:0043233//organelle lumen;GO:0031974//membrane-enclosed lumen;GO:0043226//organelle;GO:0005622//intracellular;GO:0043229//intracellular organelle;GO:0031981//nuclear lumen;GO:0005576//extracellular region;GO:0070013//intracellular…	GO:0000988//transcription factor activity, protein binding;GO:1901363//heterocyclic compound binding;GO:0003676//nucleic acid binding;GO:0003723//RNA binding;GO:0005539//glycosaminoglycan binding;GO:0008134//transcription factor binding;GO:0097159//organic cyclic compound binding;GO:0001221//transcription cofactor binding;GO:0005515//protein binding;GO:0005488//binding;GO:0001076//transcription f…	GO:0034976//response to endoplasmic reticulum stress;GO:0050794//regulation of cellular process;GO:0006950//response to stress;GO:0051716//cellular response to stimulus;GO:0033554//cellular response to stress;GO:0044699//single-organism process;GO:0035967//cellular response to topologically incorrect protein;GO:0050789//regulation of biological process;GO:0007165//signal transduction;GO:0023052//…
473	gene23623	45.1667	14.6667	0.421667	0.206667	-1.55949	0.00145747	0.0390001	down	LOC105603828	hCG1660466 [Homo sapiens]	-	-	-	-	-	-	-
474	gene23674	29.1667	6.83333	1.365	0.33	-1.98357	0.000263752	0.0148439	down	LOC105603865	-	-	-	-	-	-	-	-
475	gene23684	1.5	45.6667	0.015	0.726667	4.56701	0.000628185	0.023881	up	MAK	PREDICTED: serine/threonine-protein kinase MAK isoform X5 [Ovis aries]	-	-	-	-	GO:0005623//cell;GO:0043226//organelle;GO:0044424//intracellular part;GO:0005929//cilium;GO:0043232//intracellular non-membrane-bounded organelle;GO:0005622//intracellular;GO:0043231//intracellular membrane-bounded organelle;GO:0044430//cytoskeletal part;GO:0042995//cell projection;GO:0043227//membrane-bounded organelle;GO:0044422//organelle part;GO:0043228//non-membrane-bounded organelle;GO:0044…	GO:0000988//transcription factor activity, protein binding;GO:1901363//heterocyclic compound binding;GO:0016740//transferase activity;GO:0000989//transcription factor activity, transcription factor binding;GO:0004672//protein kinase activity;GO:0097159//organic cyclic compound binding;GO:0032549//ribonucleoside binding;GO:0003712//transcription cofactor activity;GO:0036094//small molecule binding…	GO:0032774//RNA biosynthetic process;GO:0008152//metabolic process;GO:0009058//biosynthetic process;GO:0006725//cellular aromatic compound metabolic process;GO:0018130//heterocycle biosynthetic process;GO:0016070//RNA metabolic process;GO:0046483//heterocycle metabolic process;GO:0071704//organic substance metabolic process;GO:0016310//phosphorylation;GO:0001895//retina homeostasis;GO:1901360//or…
476	gene23750	168.667	50.1667	1.63167	0.508333	-1.62788	0.000250768	0.014629	down	MYLK4	PREDICTED: myosin light chain kinase family member 4 isoform X5 [Ovis aries]	Organismal Systems;Cellular Processes;Environmental Information Processing	Cellular commiunity;Immune system;Signal transduction;Cell motility;Digestive system;Circulatory system;Endocrine system	ko04810//Regulation of actin cytoskeleton;ko04510//Focal adhesion;ko04020//Calcium signaling pathway;ko04022//cGMP - PKG signaling pathway;ko04921//Oxytocin signaling pathway;ko04270//Vascular smooth muscle contraction;ko04611//Platelet activation;ko04971//Gastric acid secretion	K00907	GO:0005576//extracellular region;GO:1903561//extracellular vesicle;GO:0031982//vesicle;GO:0043227//membrane-bounded organelle;GO:0043230//extracellular organelle;GO:0043226//organelle;GO:0044421//extracellular region part	GO:0036094//small molecule binding;GO:0032549//ribonucleoside binding;GO:0001882//nucleoside binding;GO:0016740//transferase activity;GO:1901363//heterocyclic compound binding;GO:0003824//catalytic activity;GO:0016772//transferase activity, transferring phosphorus-containing groups;GO:0001883//purine nucleoside binding;GO:0097367//carbohydrate derivative binding;GO:0097159//organic cyclic compoun…	GO:0036211//protein modification process;GO:0044260//cellular macromolecule metabolic process;GO:0071704//organic substance metabolic process;GO:0009987//cellular process;GO:0019538//protein metabolic process;GO:0006796//phosphate-containing compound metabolic process;GO:0006464//cellular protein modification process;GO:0044237//cellular metabolic process;GO:0043170//macromolecule metabolic proce…
477	gene23808	1447.33	2846.34	16.8817	34.9833	1.04118	0.000144209	0.0108855	up	CTSC	PREDICTED: dipeptidyl peptidase 1 isoform X2 [Ovis aries musimon]	Cellular Processes	Transport and catabolism	ko04142//Lysosome	K01275	-	-	-
478	gene23820	149.5	296.667	3.57833	7.47167	1.10858	0.000502088	0.0212863	up	ME3	PREDICTED: NADP-dependent malic enzyme, mitochondrial isoform X1 [Ovis aries]	Metabolism	Global and Overview;Carbohydrate metabolism	ko01200//Carbon metabolism;ko00620//Pyruvate metabolism	K00029	GO:0043226//organelle;GO:0044464//cell part;GO:0005623//cell;GO:0043229//intracellular organelle;GO:0043231//intracellular membrane-bounded organelle;GO:0005622//intracellular;GO:0044424//intracellular part;GO:0043227//membrane-bounded organelle	GO:0016614//oxidoreductase activity, acting on CH-OH group of donors;GO:0004470//malic enzyme activity;GO:0043167//ion binding;GO:1901363//heterocyclic compound binding;GO:0043169//cation binding;GO:0016491//oxidoreductase activity;GO:0003824//catalytic activity;GO:0097159//organic cyclic compound binding;GO:0016615//malate dehydrogenase activity;GO:0000166//nucleotide binding;GO:0005488//binding…	GO:0071704//organic substance metabolic process;GO:0044763//single-organism cellular process;GO:0044710//single-organism metabolic process;GO:0009987//cellular process;GO:0043436//oxoacid metabolic process;GO:0006082//organic acid metabolic process;GO:0044237//cellular metabolic process;GO:0008152//metabolic process;GO:0044699//single-organism process;GO:0043648//dicarboxylic acid metabolic proce…
479	gene23850	426	178.167	9.205	3.96833	-1.21603	8.57972e-05	0.00824897	down	PRCP	PREDICTED: lysosomal Pro-X carboxypeptidase [Ovis aries]	Organismal Systems	Digestive system;Endocrine system	ko04974//Protein digestion and absorption;ko04614//Renin-angiotensin system	K01285	-	-	-
480	gene2389	4006.83	1551.33	70.1517	27.6383	-1.20374	4.78004e-05	0.0064103	down	MLF1	PREDICTED: myeloid leukemia factor 1 isoform X1 [Capra hircus]	-	-	-	-	GO:0043231//intracellular membrane-bounded organelle;GO:0043226//organelle;GO:0005622//intracellular;GO:0005623//cell;GO:0043227//membrane-bounded organelle;GO:0044424//intracellular part;GO:0043229//intracellular organelle;GO:0044464//cell part	GO:0097159//organic cyclic compound binding;GO:1901363//heterocyclic compound binding;GO:0005488//binding;GO:0005515//protein binding;GO:0003676//nucleic acid binding	GO:0022402//cell cycle process;GO:0044707//single-multicellular organism process;GO:0010467//gene expression;GO:0071704//organic substance metabolic process;GO:0048869//cellular developmental process;GO:0044767//single-organism developmental process;GO:0008152//metabolic process;GO:0009987//cellular process;GO:0044763//single-organism cellular process;GO:0032501//multicellular organismal process;…
481	gene23894	0	32.6667	0.001	1.74	7.73614	0.000955996	0.0302166	up	CCDC179	PREDICTED: small VCP/p97-interacting protein isoform X3 [Ovis aries musimon]	-	-	-	-	-	-	-
482	gene23933	4.5	250.333	0.24	13.7717	5.47266	0.000196966	0.0127393	up	LOC105604036	-	-	-	-	-	-	-	-
483	gene23939	0.333333	34.8333	0.00333333	0.86	5.97661	0.00155923	0.0403322	up	LOC101118315	PREDICTED: L-lactate dehydrogenase C chain isoform X1 [Ovis aries]	Organismal Systems;Metabolism	Amino acid metabolism;Carbohydrate metabolism;Endocrine system	ko04922//Glucagon signaling pathway;ko00010//Glycolysis / Gluconeogenesis;ko00620//Pyruvate metabolism;ko00270//Cysteine and methionine metabolism;ko00640//Propanoate metabolism	K00016	GO:0016020//membrane;GO:0005623//cell;GO:0043231//intracellular membrane-bounded organelle;GO:0005576//extracellular region;GO:0044424//intracellular part;GO:1903561//extracellular vesicle;GO:0044421//extracellular region part;GO:0044425//membrane part;GO:0005622//intracellular;GO:0043227//membrane-bounded organelle;GO:0005929//cilium;GO:0031224//intrinsic component of membrane;GO:0043229//intrac…	GO:0016614//oxidoreductase activity, acting on CH-OH group of donors;GO:0016491//oxidoreductase activity;GO:0003824//catalytic activity	GO:0044237//cellular metabolic process;GO:0071704//organic substance metabolic process;GO:0046483//heterocycle metabolic process;GO:0009117//nucleotide metabolic process;GO:1901137//carbohydrate derivative biosynthetic process;GO:0008152//metabolic process;GO:0009260//ribonucleotide biosynthetic process;GO:0009152//purine ribonucleotide biosynthetic process;GO:0006089//lactate metabolic process;G…
484	gene2396	169.167	12.1667	4.37	0.305	-3.65719	7.60396e-05	0.00805135	down	PTX3	PREDICTED: pentraxin-related protein PTX3 [Ovis aries]	-	-	-	-	GO:0005576//extracellular region;GO:0044421//extracellular region part	GO:0005488//binding;GO:0030247//polysaccharide binding;GO:0001871//pattern binding;GO:0030246//carbohydrate binding	GO:0009987//cellular process;GO:0044249//cellular biosynthetic process;GO:0006810//transport;GO:0044868//modulation by host of viral molecular function;GO:0044409//entry into host;GO:0051707//response to other organism;GO:0016032//viral process;GO:0044866//modulation by host of viral exo-alpha-sialidase activity;GO:0072593//reactive oxygen species metabolic process;GO:0043207//response to externa…
485	gene24049	34	217.833	2.86	19.1333	2.46712	0.00200992	0.04673	up	SPA17	PREDICTED: sperm surface protein Sp17 isoform X2 [Ovis aries]	-	-	-	-	-	-	-
486	gene24069	0	105.167	0.001	4.42	9.41538	0.000177076	0.0122527	up	ACRV1	PREDICTED: acrosomal protein SP-10 [Ovis aries]	-	-	-	-	-	-	-
487	gene24077	25	177.5	0.75	5.54167	2.63778	0.00133719	0.0372065	up	DDX25	PREDICTED: ATP-dependent RNA helicase DDX25 isoform X1 [Ovis aries]	-	-	-	-	-	-	-
488	gene24092	1854.33	705.833	15.7017	6.12167	-1.3185	8.6867e-08	9.24223e-05	down	ETS1	PREDICTED: protein C-ets-1 isoform X1 [Ovis aries]	Organismal Systems;Environmental Information Processing	Signal transduction;Development	ko04014//Ras signaling pathway;ko04320//Dorso-ventral axis formation	K02678	-	-	-
489	gene24109	0	100.667	0.001	6.525	9.35244	0.000185154	0.0124925	up	SPATA19	PREDICTED: spermatogenesis-associated protein 19, mitochondrial [Ovis aries]	-	-	-	-	GO:0005622//intracellular;GO:0043231//intracellular membrane-bounded organelle;GO:0044464//cell part;GO:0043229//intracellular organelle;GO:0044424//intracellular part;GO:0043227//membrane-bounded organelle;GO:0043226//organelle;GO:0005623//cell	-	GO:0007276//gamete generation;GO:0048232//male gamete generation;GO:0044703//multi-organism reproductive process;GO:0044699//single-organism process;GO:0044707//single-multicellular organism process;GO:0032504//multicellular organism reproduction;GO:0051704//multi-organism process;GO:0032502//developmental process;GO:0022414//reproductive process;GO:0000003//reproduction;GO:0048869//cellular deve…
490	gene24113	0	20.1667	0.001	0.206667	7.05987	0.00110859	0.0329818	up	LOC105604067	-	-	-	-	-	-	-	-
491	gene24123	170.833	21.1667	2.12333	0.261667	-2.9962	0.0010193	0.0313228	down	ADAMTS8	PREDICTED: A disintegrin and metalloproteinase with thrombospondin motifs 8 isoform X2 [Ovis aries musimon]	-	-	-	-	GO:0005576//extracellular region;GO:0016020//membrane;GO:0044425//membrane part;GO:0031012//extracellular matrix;GO:0044421//extracellular region part;GO:0031224//intrinsic component of membrane	GO:0097367//carbohydrate derivative binding;GO:0005215//transporter activity;GO:0016787//hydrolase activity;GO:0070011//peptidase activity, acting on L-amino acid peptides;GO:0022891//substrate-specific transmembrane transporter activity;GO:0005515//protein binding;GO:0022857//transmembrane transporter activity;GO:0046872//metal ion binding;GO:0043169//cation binding;GO:0015114//phosphate ion tra…	GO:0044699//single-organism process;GO:0043170//macromolecule metabolic process;GO:0006820//anion transport;GO:0019538//protein metabolic process;GO:0051179//localization;GO:0006810//transport;GO:0051234//establishment of localization;GO:0044238//primary metabolic process;GO:0008283//cell proliferation;GO:0015698//inorganic anion transport;GO:0071704//organic substance metabolic process;GO:000815…
492	gene24166	27.2833	1.56333	0.211667	0.0116667	-4.03028	0.000272039	0.0151198	down	LOC105604082	PREDICTED: LOW QUALITY PROTEIN: protein NYNRIN-like [Ovis aries]	-	-	-	-	-	-	-
493	gene24218	0.5	194.167	0.015	6.08833	7.93065	0.00054305	0.0221713	up	PPP1R32	PREDICTED: protein phosphatase 1 regulatory subunit 32 isoform X1 [Ovis aries]	-	-	-	-	-	GO:0019899//enzyme binding;GO:0005488//binding;GO:0005515//protein binding	-
494	gene24230	0.5	29.5	0.005	0.306667	5.28647	0.00134036	0.0372483	up	BEST1	PREDICTED: bestrophin-1 isoform X4 [Ovis aries]	-	-	-	-	-	-	-
495	gene24237	348.167	834.167	5.94333	14.695	1.29577	7.62991e-06	0.00195948	up	ASRGL1	PREDICTED: isoaspartyl peptidase/L-asparaginase [Ovis aries]	-	-	-	-	GO:0005623//cell;GO:0043226//organelle;GO:0005622//intracellular;GO:0043229//intracellular organelle;GO:0043227//membrane-bounded organelle;GO:0043231//intracellular membrane-bounded organelle;GO:0044424//intracellular part;GO:0044464//cell part	GO:0016787//hydrolase activity;GO:0008242//omega peptidase activity;GO:0003824//catalytic activity;GO:0008238//exopeptidase activity;GO:0008233//peptidase activity;GO:0016811//hydrolase activity, acting on carbon-nitrogen (but not peptide) bonds, in linear amides;GO:0016810//hydrolase activity, acting on carbon-nitrogen (but not peptide) bonds;GO:0070011//peptidase activity, acting on L-amino aci…	GO:0043170//macromolecule metabolic process;GO:0009065//glutamine family amino acid catabolic process;GO:0044281//small molecule metabolic process;GO:0043436//oxoacid metabolic process;GO:0006528//asparagine metabolic process;GO:0044712//single-organism catabolic process;GO:0071704//organic substance metabolic process;GO:1901564//organonitrogen compound metabolic process;GO:0044248//cellular cata…
496	gene24253	367.833	824	9.96833	23.2183	1.17515	5.47369e-05	0.00673575	up	BSCL2	PREDICTED: seipin isoform X1 [Ovis aries]	-	-	-	-	GO:0044422//organelle part;GO:0043226//organelle;GO:0044425//membrane part;GO:0043227//membrane-bounded organelle;GO:0043231//intracellular membrane-bounded organelle;GO:0005623//cell;GO:0031224//intrinsic component of membrane;GO:0044446//intracellular organelle part;GO:0012505//endomembrane system;GO:0044424//intracellular part;GO:0005789//endoplasmic reticulum membrane;GO:0044464//cell part;GO…	-	GO:0044763//single-organism cellular process;GO:0009894//regulation of catabolic process;GO:0048519//negative regulation of biological process;GO:0008152//metabolic process;GO:0071704//organic substance metabolic process;GO:0051179//localization;GO:0006629//lipid metabolic process;GO:0006996//organelle organization;GO:0019222//regulation of metabolic process;GO:0009895//negative regulation of cat…
497	gene24254	5	54.3333	0.23	2.54333	3.22993	0.00211608	0.0485416	up	LOC101114066	-	-	-	-	-	-	-	-
498	gene24284	0.666667	90	0.0216667	3.2	6.57129	0.00029772	0.0158758	up	HRASLS5	PREDICTED: Ca(2+)-independent N-acyltransferase isoform X1 [Ovis aries]	-	-	-	-	-	-	GO:0044237//cellular metabolic process;GO:0043603//cellular amide metabolic process;GO:0006807//nitrogen compound metabolic process;GO:0008152//metabolic process;GO:0009987//cellular process;GO:0034641//cellular nitrogen compound metabolic process
499	gene24304	232.333	422.833	14.0883	26.6683	1.02617	0.00153093	0.0398666	up	TRPT1	PREDICTED: tRNA 2'-phosphotransferase 1 [Ovis aries]	-	-	-	-	-	GO:0016740//transferase activity;GO:0008665//2'-phosphotransferase activity;GO:0003824//catalytic activity	GO:0000394//RNA splicing, via endonucleolytic cleavage and ligation;GO:0031399//regulation of protein modification process;GO:0051246//regulation of protein metabolic process;GO:0006399//tRNA metabolic process;GO:1901360//organic cyclic compound metabolic process;GO:0080090//regulation of primary metabolic process;GO:0006807//nitrogen compound metabolic process;GO:0019222//regulation of metabolic…
500	gene24313	0.166667	143.333	0.00666667	6.64667	8.62028	0.000314446	0.0163104	up	TEX40	PREDICTED: testis-expressed sequence 40 protein isoform X1 [Ovis aries]	-	-	-	-	GO:0005623//cell;GO:0098796//membrane protein complex;GO:0044425//membrane part;GO:0071944//cell periphery;GO:0043234//protein complex;GO:0032991//macromolecular complex;GO:0005886//plasma membrane;GO:0031224//intrinsic component of membrane;GO:0034702//ion channel complex;GO:1990351//transporter complex;GO:0034703//cation channel complex;GO:1902495//transmembrane transporter complex;GO:0016021//…	GO:0008324//cation transmembrane transporter activity;GO:0022857//transmembrane transporter activity;GO:0005261//cation channel activity;GO:0022803//passive transmembrane transporter activity;GO:0022891//substrate-specific transmembrane transporter activity;GO:0015079//potassium ion transmembrane transporter activity;GO:0015075//ion transmembrane transporter activity;GO:0005216//ion channel activ…	GO:0051234//establishment of localization;GO:0050974//detection of mechanical stimulus involved in sensory perception;GO:0007600//sensory perception;GO:0009582//detection of abiotic stimulus;GO:1901700//response to oxygen-containing compound;GO:0009581//detection of external stimulus;GO:0050896//response to stimulus;GO:0050877//neurological system process;GO:0009612//response to mechanical stimul…
501	gene24356	19.54	0	0.416667	0.001	-7.32057	5.50509e-06	0.00148883	down	LOC101107147	PREDICTED: LOW QUALITY PROTEIN: bifunctional methylenetetrahydrofolate dehydrogenase/cyclohydrolase, mitochondrial-like isoform X1 [Ovis aries]	Metabolism	Metabolism of cofactors and vitamins	ko00670//One carbon pool by folate	K13403	-	-	-
502	gene24417	181	371.5	2.51333	5.30833	1.10076	0.000160479	0.0117176	up	PELI3	PREDICTED: E3 ubiquitin-protein ligase pellino homolog 3 isoform X3 [Ovis aries musimon]	-	-	-	-	-	-	GO:0044700//single organism signaling;GO:0012501//programmed cell death;GO:0060761//negative regulation of response to cytokine stimulus;GO:0097190//apoptotic signaling pathway;GO:0010648//negative regulation of cell communication;GO:0044699//single-organism process;GO:0023057//negative regulation of signaling;GO:0007166//cell surface receptor signaling pathway;GO:0007165//signal transduction;GO:…
503	gene24424	0	45.6667	0.001	0.485	8.21637	0.000543789	0.0221713	up	CCDC87	PREDICTED: coiled-coil domain-containing protein 87 [Ovis aries]	-	-	-	-	-	-	-
504	gene24480	0	32.1667	0.001	0.603333	7.71828	0.000574289	0.0228316	up	MTL5	PREDICTED: tesmin isoform X1 [Ovis aries]	-	-	-	-	GO:0044424//intracellular part;GO:0044464//cell part;GO:0005622//intracellular;GO:0005623//cell	-	-
505	gene2457	219.5	425	11.6133	23.7217	1.185	0.00166353	0.041809	up	PFN2	PREDICTED: profilin-2 isoform X2 [Colobus angolensis palliatus]	Cellular Processes;Environmental Information Processing	Signal transduction;Cell motility	ko04810//Regulation of actin cytoskeleton;ko04015//Rap1 signaling pathway	K05759	-	-	-
506	gene24607	0	136.833	0.001	6.19667	9.79533	6.88472e-05	0.00764398	up	SYCE1	PREDICTED: synaptonemal complex central element protein 1 isoform X1 [Ovis aries]	-	-	-	-	GO:0043231//intracellular membrane-bounded organelle;GO:0044464//cell part;GO:0000794//condensed nuclear chromosome;GO:0031974//membrane-enclosed lumen;GO:0044428//nuclear part;GO:0044427//chromosomal part;GO:0005694//chromosome;GO:0043226//organelle;GO:0043232//intracellular non-membrane-bounded organelle;GO:0043227//membrane-bounded organelle;GO:0000795//synaptonemal complex;GO:0043228//non-mem…	-	GO:0009987//cellular process;GO:0045132//meiotic chromosome segregation;GO:0022402//cell cycle process;GO:0070192//chromosome organization involved in meiotic cell cycle;GO:0044702//single organism reproductive process;GO:0000280//nuclear division;GO:0016043//cellular component organization;GO:0048285//organelle fission;GO:0071840//cellular component organization or biogenesis;GO:0045143//homolog…
507	gene2461	513.5	237.167	5.02333	2.385	-1.03421	2.32331e-05	0.00399305	down	WWTR1	PREDICTED: LOW QUALITY PROTEIN: WW domain-containing transcription regulator protein 1 [Ovis aries]	Environmental Information Processing	Signal transduction	ko04390//Hippo signaling pathway	K16820	GO:0070013//intracellular organelle lumen;GO:0043226//organelle;GO:0043229//intracellular organelle;GO:0044424//intracellular part;GO:0044444//cytoplasmic part;GO:0044446//intracellular organelle part;GO:0044428//nuclear part;GO:0031981//nuclear lumen;GO:0044464//cell part;GO:0031974//membrane-enclosed lumen;GO:0005623//cell;GO:0005634//nucleus;GO:0005737//cytoplasm;GO:0044422//organelle part;GO:…	GO:0005488//binding;GO:0000988//transcription factor activity, protein binding;GO:0003712//transcription cofactor activity;GO:0005515//protein binding;GO:0000989//transcription factor activity, transcription factor binding;GO:0046983//protein dimerization activity	GO:0051170//nuclear import;GO:0010646//regulation of cell communication;GO:0044265//cellular macromolecule catabolic process;GO:0006725//cellular aromatic compound metabolic process;GO:1902578//single-organism localization;GO:0035411//catenin import into nucleus;GO:0048585//negative regulation of response to stimulus;GO:0044249//cellular biosynthetic process;GO:0034645//cellular macromolecule bio…
508	gene24611	803.667	294.333	5.77833	1.975	-1.26077	0.00104924	0.0318935	down	PRKG1	PREDICTED: cGMP-dependent protein kinase 1 isoform X2 [Ovis aries]	Cellular Processes;Organismal Systems;Environmental Information Processing	Nervous system;Cellular commiunity;Sensory system;Digestive system;Endocrine system;Circulatory system;Signal transduction;Immune system;Environmental adaptation	ko04740//Olfactory transduction;ko04022//cGMP - PKG signaling pathway;ko04270//Vascular smooth muscle contraction;ko04611//Platelet activation;ko04970//Salivary secretion;ko04713//Circadian entrainment;ko04540//Gap junction;ko04730//Long-term depression;ko04923//Regulation of lipolysis in adipocyte	K07376	GO:0044444//cytoplasmic part;GO:0044464//cell part;GO:0005623//cell;GO:0043229//intracellular organelle;GO:0005737//cytoplasm;GO:0044424//intracellular part;GO:0005622//intracellular;GO:0043227//membrane-bounded organelle;GO:0043226//organelle;GO:0043231//intracellular membrane-bounded organelle;GO:0016020//membrane	GO:0003824//catalytic activity;GO:0016301//kinase activity;GO:0016740//transferase activity;GO:0001882//nucleoside binding;GO:0032550//purine ribonucleoside binding;GO:0097159//organic cyclic compound binding;GO:0004690//cyclic nucleotide-dependent protein kinase activity;GO:0000166//nucleotide binding;GO:0036094//small molecule binding;GO:0005488//binding;GO:0032549//ribonucleoside binding;GO:00…	GO:0044767//single-organism developmental process;GO:0030195//negative regulation of blood coagulation;GO:0065009//regulation of molecular function;GO:0050865//regulation of cell activation;GO:0044238//primary metabolic process;GO:0022008//neurogenesis;GO:0010543//regulation of platelet activation;GO:0050878//regulation of body fluid levels;GO:0050819//negative regulation of coagulation;GO:004869…
509	gene2465	186.333	67.3333	9.74333	3.62	-1.34659	0.000404371	0.0189002	down	TM4SF18	PREDICTED: transmembrane 4 L6 family member 18 isoform X1 [Ovis aries]	-	-	-	-	-	-	-
510	gene24658	70.6667	19.8333	0.601667	0.175	-1.71587	0.000390531	0.0184865	down	HECTD2	PREDICTED: probable E3 ubiquitin-protein ligase HECTD2 isoform X1 [Ovis aries]	-	-	-	-	-	-	-
511	gene24723	1443.33	6141.5	45.565	211.412	2.4784	0.000924296	0.0297145	up	ANKRD2	PREDICTED: LOW QUALITY PROTEIN: ankyrin repeat domain-containing protein 2 [Capra hircus]	-	-	-	-	-	-	-
512	gene24725	5.66667	259.667	0.196667	9.665	5.27025	0.000501765	0.0212863	up	C22H10orf62	chromosome 10 open reading frame 62, partial [Homo sapiens]	-	-	-	-	-	-	-
513	gene24740	191.333	52.6667	1.54333	0.423333	-1.7221	0.00196545	0.0461766	down	LOXL4	PREDICTED: lysyl oxidase homolog 4 isoform X1 [Ovis aries]	-	-	-	-	GO:0032991//macromolecular complex;GO:0043230//extracellular organelle;GO:0031982//vesicle;GO:0043227//membrane-bounded organelle;GO:0043234//protein complex;GO:0044421//extracellular region part;GO:1903561//extracellular vesicle;GO:0005576//extracellular region;GO:0043226//organelle	GO:0043167//ion binding;GO:0005488//binding;GO:0003824//catalytic activity;GO:0016491//oxidoreductase activity;GO:0046914//transition metal ion binding;GO:0043169//cation binding;GO:0046872//metal ion binding;GO:0016638//oxidoreductase activity, acting on the CH-NH2 group of donors	GO:0008152//metabolic process;GO:0006897//endocytosis;GO:0044710//single-organism metabolic process;GO:0051234//establishment of localization;GO:0006810//transport;GO:0044699//single-organism process;GO:0016192//vesicle-mediated transport;GO:0051179//localization
514	gene24790	109.89	245.527	6.8	15.8283	1.20922	7.77681e-05	0.00805135	up	DPCD	PREDICTED: protein DPCD isoform X1 [Ovis aries]	-	-	-	-	GO:0044464//cell part;GO:0043226//organelle;GO:0043231//intracellular membrane-bounded organelle;GO:0044424//intracellular part;GO:0005623//cell;GO:0043227//membrane-bounded organelle;GO:0043229//intracellular organelle;GO:0005622//intracellular	-	GO:0044767//single-organism developmental process;GO:0048731//system development;GO:0044703//multi-organism reproductive process;GO:0048870//cell motility;GO:0007420//brain development;GO:0044763//single-organism cellular process;GO:0032502//developmental process;GO:0006928//movement of cell or subcellular component;GO:0007275//multicellular organism development;GO:0051704//multi-organism process…
515	gene24847	1	25.6667	0.045	1.25833	4.26664	0.000915547	0.0296036	up	GSTO2	PREDICTED: glutathione S-transferase omega-2 [Ovis aries]	Metabolism	Xenobiotics biodegradation and metabolism;Metabolism of other amino acids	ko00980//Metabolism of xenobiotics by cytochrome P450;ko00982//Drug metabolism - cytochrome P450;ko00480//Glutathione metabolism	K00799	-	-	-
516	gene24893	216.667	93	2.38833	1.06	-1.11546	0.000138659	0.0106829	down	AFAP1L2	PREDICTED: actin filament-associated protein 1-like 2 isoform X5 [Ovis aries musimon]	-	-	-	-	GO:0016020//membrane	GO:0005515//protein binding;GO:0098772//molecular function regulator;GO:0019207//kinase regulator activity;GO:0030234//enzyme regulator activity;GO:0019904//protein domain specific binding;GO:0019887//protein kinase regulator activity;GO:0060090//binding, bridging;GO:0019209//kinase activator activity;GO:0008047//enzyme activator activity;GO:0005488//binding;GO:0030295//protein kinase activator a…	GO:0097659//nucleic acid-templated transcription;GO:0044249//cellular biosynthetic process;GO:0034641//cellular nitrogen compound metabolic process;GO:0031401//positive regulation of protein modification process;GO:0051347//positive regulation of transferase activity;GO:0044260//cellular macromolecule metabolic process;GO:0009059//macromolecule biosynthetic process;GO:0007167//enzyme linked recep…
517	gene24954	0	31.1667	0.001	0.706667	7.67465	0.000642729	0.0241555	up	BTBD16	PREDICTED: BTB/POZ domain-containing protein 16 isoform X1 [Ovis aries]	-	-	-	-	-	-	-
518	gene24962	0	39.1667	0.001	1.82833	7.99615	0.00069357	0.025301	up	C22H10orf120	chromosome 10 open reading frame 120 [Homo sapiens]	-	-	-	-	-	-	-
519	gene2497	198.667	70.005	1.67	0.61	-1.36259	2.18933e-05	0.00379195	down	PLOD2	PREDICTED: procollagen-lysine,2-oxoglutarate 5-dioxygenase 2 isoform X4 [Ovis aries]	Metabolism	Amino acid metabolism	ko00310//Lysine degradation	K13645	GO:0044422//organelle part;GO:0005789//endoplasmic reticulum membrane;GO:0042175//nuclear outer membrane-endoplasmic reticulum membrane network;GO:0043227//membrane-bounded organelle;GO:0043229//intracellular organelle;GO:0005737//cytoplasm;GO:0005576//extracellular region;GO:0031982//vesicle;GO:0043226//organelle;GO:0043231//intracellular membrane-bounded organelle;GO:0044425//membrane part;GO:0…	GO:0051213//dioxygenase activity;GO:0046872//metal ion binding;GO:0043167//ion binding;GO:0046914//transition metal ion binding;GO:0019842//vitamin binding;GO:0016706//oxidoreductase activity, acting on paired donors, with incorporation or reduction of molecular oxygen, 2-oxoglutarate as one donor, and incorporation of one atom each of oxygen into both donors;GO:0003824//catalytic activity;GO:001…	GO:0071704//organic substance metabolic process;GO:1903008//organelle disassembly;GO:0009987//cellular process;GO:0006950//response to stress;GO:0042221//response to chemical;GO:0010033//response to organic substance;GO:0009725//response to hormone;GO:0006914//autophagy;GO:0044238//primary metabolic process;GO:0016236//macroautophagy;GO:0050896//response to stimulus;GO:0043170//macromolecule meta…
520	gene25006	0.333333	58.8333	0.0133333	2.46667	6.69819	0.000824609	0.028345	up	FANK1	PREDICTED: fibronectin type 3 and ankyrin repeat domains protein 1 isoform X1 [Ovis aries]	-	-	-	-	GO:0043231//intracellular membrane-bounded organelle;GO:0005623//cell;GO:0005622//intracellular;GO:0044464//cell part;GO:0044424//intracellular part;GO:0043227//membrane-bounded organelle;GO:0043229//intracellular organelle;GO:0043226//organelle	-	-
521	gene25009	0.333333	64.5	0.00333333	0.521667	6.85928	0.00131474	0.0368112	up	C22H10orf90	PREDICTED: centrosomal protein C10orf90 homolog isoform X3 [Ovis aries]	-	-	-	-	-	-	-
522	gene25190	71.6667	27.3333	0.551667	0.218333	-1.35821	0.00214377	0.0489758	down	RNF125	PREDICTED: E3 ubiquitin-protein ligase RNF125 isoform X3 [Ovis aries musimon]	Organismal Systems	Immune system	ko04622//RIG-I-like receptor signaling pathway	K12170	-	GO:0043169//cation binding;GO:0046872//metal ion binding;GO:0019787//ubiquitin-like protein transferase activity;GO:0005488//binding;GO:0046914//transition metal ion binding;GO:0043167//ion binding;GO:0016740//transferase activity;GO:0003824//catalytic activity	GO:0006464//cellular protein modification process;GO:0044238//primary metabolic process;GO:0009987//cellular process;GO:0070647//protein modification by small protein conjugation or removal;GO:0044237//cellular metabolic process;GO:0036211//protein modification process;GO:0019538//protein metabolic process;GO:0008152//metabolic process;GO:0043170//macromolecule metabolic process;GO:0044267//cellu…
523	gene25220	0	123.667	0.001	6.45	9.64865	0.000142478	0.0108648	up	LOC105604449	-	-	-	-	-	-	-	-
524	gene25239	132.333	44	1.35667	0.475	-1.54424	0.00113869	0.0336085	down	GATA6	PREDICTED: transcription factor GATA-6 isoform X2 [Ovis aries musimon]	-	-	-	-	-	-	-
525	gene25251	0	32.5	0.001	1.35833	7.72881	0.000958849	0.0302166	up	LOC101102195	PREDICTED: proteolipid protein 2-like [Ovis aries]	-	-	-	-	GO:0044425//membrane part;GO:0042175//nuclear outer membrane-endoplasmic reticulum membrane network;GO:0005623//cell;GO:0005576//extracellular region;GO:0031982//vesicle;GO:0043230//extracellular organelle;GO:0031224//intrinsic component of membrane;GO:0043227//membrane-bounded organelle;GO:0044424//intracellular part;GO:0016020//membrane;GO:0044464//cell part;GO:0005622//intracellular;GO:0044421…	GO:0022891//substrate-specific transmembrane transporter activity;GO:0005488//binding;GO:0005215//transporter activity;GO:0005515//protein binding;GO:0022892//substrate-specific transporter activity;GO:0022857//transmembrane transporter activity;GO:0019955//cytokine binding	GO:0050789//regulation of biological process;GO:0006811//ion transport;GO:0007166//cell surface receptor signaling pathway;GO:0051179//localization;GO:0007165//signal transduction;GO:0050794//regulation of cellular process;GO:0051234//establishment of localization;GO:0050896//response to stimulus;GO:0044699//single-organism process;GO:0006810//transport;GO:0051716//cellular response to stimulus;G…
526	gene25257	0	197.667	0.001	5.17	10.3251	5.09671e-05	0.00658361	up	CETN1	PREDICTED: centrin-1 [Ovis aries]	-	-	-	-	GO:0005856//cytoskeleton;GO:0005622//intracellular;GO:0043229//intracellular organelle;GO:0042995//cell projection;GO:0005929//cilium;GO:0043232//intracellular non-membrane-bounded organelle;GO:0044430//cytoskeletal part;GO:0031513//nonmotile primary cilium;GO:0044446//intracellular organelle part;GO:0044424//intracellular part;GO:0005623//cell;GO:0043228//non-membrane-bounded organelle;GO:000581…	GO:0008092//cytoskeletal protein binding;GO:0015631//tubulin binding;GO:0043169//cation binding;GO:0005488//binding;GO:0032403//protein complex binding;GO:0005515//protein binding;GO:0046872//metal ion binding;GO:0044877//macromolecular complex binding;GO:0043167//ion binding	GO:0044699//single-organism process;GO:0009987//cellular process;GO:0007049//cell cycle;GO:0050896//response to stimulus;GO:0009408//response to heat;GO:0000278//mitotic cell cycle;GO:0009266//response to temperature stimulus;GO:0044763//single-organism cellular process;GO:0009628//response to abiotic stimulus;GO:0006950//response to stress
527	gene25261	139.333	57.6667	1.57833	0.675	-1.21938	0.000489113	0.0210713	down	YES1	PREDICTED: tyrosine-protein kinase Yes [Ovis aries]	Cellular Processes	Cellular commiunity	ko04530//Tight junction;ko04520//Adherens junction	K05705	-	-	-
528	gene25266	49.5	5.16667	1	0.103333	-3.22769	0.000424	0.0193731	down	NDC80	PREDICTED: kinetochore protein NDC80 homolog isoform X2 [Ovis aries]	-	-	-	-	-	-	-
529	gene25335	10.3333	1.5	0.38	0.0583333	-2.60872	0.00200987	0.04673	down	LOC105604496	-	-	-	-	-	-	-	-
530	gene25349	0.166667	24.6667	0.00166667	0.265	6.1738	0.00144631	0.0387935	up	KATNAL2	PREDICTED: katanin p60 ATPase-containing subunit A-like 2 isoform X2 [Ovis aries]	-	-	-	-	GO:0005856//cytoskeleton;GO:0043232//intracellular non-membrane-bounded organelle;GO:0043228//non-membrane-bounded organelle;GO:0015630//microtubule cytoskeleton;GO:0005622//intracellular;GO:0043226//organelle;GO:0044464//cell part;GO:0005623//cell;GO:0043229//intracellular organelle;GO:0044424//intracellular part	GO:0036094//small molecule binding;GO:0016887//ATPase activity;GO:0016462//pyrophosphatase activity;GO:0032550//purine ribonucleoside binding;GO:0042623//ATPase activity, coupled;GO:0016817//hydrolase activity, acting on acid anhydrides;GO:0005515//protein binding;GO:0016787//hydrolase activity;GO:1901363//heterocyclic compound binding;GO:0016818//hydrolase activity, acting on acid anhydrides, in…	GO:0044763//single-organism cellular process;GO:0007017//microtubule-based process;GO:0044699//single-organism process;GO:0009987//cellular process
531	gene2535	0	32.5	0.001	0.346667	7.72881	0.000958439	0.0302166	up	TRIM42	PREDICTED: LOW QUALITY PROTEIN: tripartite motif-containing protein 42 isoform X2 [Ovis aries]	-	-	-	-	-	GO:0043169//cation binding;GO:0046872//metal ion binding;GO:0005488//binding;GO:0043167//ion binding;GO:0046914//transition metal ion binding	-
532	gene25429	320.923	92.615	12.3433	4.76167	-1.58578	0.000213138	0.0133768	down	LOC105604560	-	-	-	-	-	-	-	-
533	gene25491	32.3333	223.5	3.69	28.1333	2.82841	7.33074e-05	0.00787456	up	LOC101108797	PREDICTED: hemoglobin subunit alpha-1/2 isoform X2 [Ovis aries musimon]	-	-	-	-	GO:0032991//macromolecular complex;GO:0043234//protein complex	GO:0005488//binding;GO:0022892//substrate-specific transporter activity;GO:0043167//ion binding;GO:0046872//metal ion binding;GO:0046914//transition metal ion binding;GO:0097159//organic cyclic compound binding;GO:0043169//cation binding;GO:0005215//transporter activity;GO:0046906//tetrapyrrole binding;GO:1901363//heterocyclic compound binding	GO:0044699//single-organism process;GO:0006810//transport;GO:1902578//single-organism localization;GO:0051234//establishment of localization;GO:0051179//localization;GO:0044765//single-organism transport;GO:0015669//gas transport
534	gene25503	97.6667	190.167	3.025	6.12	1.05489	0.000645568	0.0242012	up	DECR2	PREDICTED: peroxisomal 2,4-dienoyl-CoA reductase isoform X2 [Ovis aries]	Cellular Processes	Transport and catabolism	ko04146//Peroxisome	K13237	-	GO:0005515//protein binding;GO:0003824//catalytic activity;GO:0005488//binding;GO:0016627//oxidoreductase activity, acting on the CH-CH group of donors;GO:0016740//transferase activity;GO:0016628//oxidoreductase activity, acting on the CH-CH group of donors, NAD or NADP as acceptor;GO:0016491//oxidoreductase activity	GO:0044710//single-organism metabolic process;GO:0044255//cellular lipid metabolic process;GO:0044699//single-organism process;GO:0071704//organic substance metabolic process;GO:0043436//oxoacid metabolic process;GO:0009058//biosynthetic process;GO:0044711//single-organism biosynthetic process;GO:0072330//monocarboxylic acid biosynthetic process;GO:0008610//lipid biosynthetic process;GO:0016053//…
535	gene25538	0	87.3333	0.001	2.29	9.14957	0.00012297	0.00981254	up	LOC101106386	PREDICTED: tektin-4 isoform X2 [Ovis aries musimon]	-	-	-	-	GO:0044464//cell part;GO:0015630//microtubule cytoskeleton;GO:0005622//intracellular;GO:0005856//cytoskeleton;GO:0043226//organelle;GO:0043232//intracellular non-membrane-bounded organelle;GO:0005929//cilium;GO:0044424//intracellular part;GO:0005623//cell;GO:0043229//intracellular organelle;GO:0042995//cell projection;GO:0043228//non-membrane-bounded organelle	-	GO:0016043//cellular component organization;GO:0009987//cellular process;GO:0071840//cellular component organization or biogenesis
536	gene25610	0	23.795	0.001	0.45	7.2853	0.0016005	0.0410678	up	LOC101117984	PREDICTED: testisin isoform X1 [Ovis aries]	-	-	-	-	-	-	-
537	gene25612	30.8333	116.167	1.015	3.93167	2.00345	3.1404e-05	0.00477728	up	PRSS33	PREDICTED: serine protease 33 isoform X2 [Ovis aries musimon]	-	-	-	-	GO:0005576//extracellular region;GO:0044421//extracellular region part	GO:0008233//peptidase activity;GO:0016787//hydrolase activity;GO:0003824//catalytic activity;GO:0070011//peptidase activity, acting on L-amino acid peptides	GO:0008152//metabolic process;GO:0071704//organic substance metabolic process;GO:0044238//primary metabolic process;GO:0019538//protein metabolic process;GO:0043170//macromolecule metabolic process
538	gene25620	114.833	226.833	2.075	4.24	1.05482	0.000102564	0.0089095	up	FLYWCH1	PREDICTED: FLYWCH-type zinc finger-containing protein 1 [Pantholops hodgsonii]	-	-	-	-	-	-	-
539	gene25629	84	186	40.9217	93.8533	1.27854	7.1064e-05	0.00770769	up	HCFC1R1	PREDICTED: host cell factor C1 regulator 1 isoform X1, partial [Ovis aries]	-	-	-	-	GO:0005623//cell;GO:0044464//cell part;GO:0044424//intracellular part;GO:0005622//intracellular	-	-
540	gene25635	202.143	1818.83	4.89333	44.7183	3.27763	0.000256369	0.014763	up	LOC105604623	PREDICTED: interleukin-32 isoform X3 [Bubalus bubalis]	-	-	-	-	-	-	-
541	gene25636	103.962	1061.96	8.04167	78.6483	3.64132	0.000153568	0.011324	up	LOC105604851	PREDICTED: interleukin-32 isoform X3 [Bubalus bubalis]	-	-	-	-	-	-	-
542	gene25711	0	62.1667	0.001	2.40833	8.65929	0.000345331	0.0169772	up	2019-09-12	PREDICTED: LOW QUALITY PROTEIN: septin-12 isoform X1 [Ovis aries]	-	-	-	-	GO:0043228//non-membrane-bounded organelle;GO:0032156//septin cytoskeleton;GO:0043232//intracellular non-membrane-bounded organelle;GO:0005737//cytoplasm;GO:0042995//cell projection;GO:0043229//intracellular organelle;GO:0005623//cell;GO:0097223//sperm part;GO:0031514//motile cilium;GO:0044424//intracellular part;GO:0005929//cilium;GO:0032153//cell division site;GO:0036126//sperm flagellum;GO:000…	GO:0005488//binding;GO:0001882//nucleoside binding;GO:0005515//protein binding;GO:0097159//organic cyclic compound binding;GO:0001883//purine nucleoside binding;GO:0046983//protein dimerization activity;GO:0005543//phospholipid binding;GO:1901363//heterocyclic compound binding;GO:0032550//purine ribonucleoside binding;GO:0032549//ribonucleoside binding;GO:0008289//lipid binding;GO:0097367//carboh…	GO:0009987//cellular process;GO:0044699//single-organism process;GO:0044763//single-organism cellular process
543	gene25749	0	38.5	0.001	1.02	7.97154	0.000721721	0.025842	up	TEKT5	PREDICTED: tektin-5 [Ovis aries]	-	-	-	-	-	-	-
544	gene25756	0.666667	755.167	0.0716667	87.8583	9.64627	1.10444e-05	0.00246766	up	TNP2	PREDICTED: nuclear transition protein 2 [Ovis aries]	-	-	-	-	-	-	-
545	gene25759	0.333333	1564.17	0.203333	1024.6	11.4501	4.83951e-06	0.00140428	up	PRM1	sperm protamine P1 [Ovis aries]	-	-	-	-	-	-	-
546	gene2578	59	14	0.406667	0.101667	-1.98451	7.85143e-05	0.00805135	down	EPHB1	PREDICTED: ephrin type-B receptor 1 isoform X1 [Ovis aries musimon]	Organismal Systems	Development	ko04360//Axon guidance	K05110	GO:0005886//plasma membrane;GO:0044425//membrane part;GO:0043231//intracellular membrane-bounded organelle;GO:0005623//cell;GO:0030175//filopodium;GO:0043227//membrane-bounded organelle;GO:0016020//membrane;GO:0043226//organelle;GO:0044424//intracellular part;GO:1903561//extracellular vesicle;GO:0005769//early endosome;GO:0044444//cytoplasmic part;GO:0005576//extracellular region;GO:0042995//cell…	GO:0003824//catalytic activity;GO:0005003//ephrin receptor activity;GO:0032550//purine ribonucleoside binding;GO:0016772//transferase activity, transferring phosphorus-containing groups;GO:0032549//ribonucleoside binding;GO:0004672//protein kinase activity;GO:0005515//protein binding;GO:0004871//signal transducer activity;GO:0099600//transmembrane receptor activity;GO:0097159//organic cyclic comp…	GO:0007417//central nervous system development;GO:0050896//response to stimulus;GO:0007167//enzyme linked receptor protein signaling pathway;GO:0032268//regulation of cellular protein metabolic process;GO:0071704//organic substance metabolic process;GO:0032989//cellular component morphogenesis;GO:0042325//regulation of phosphorylation;GO:0044260//cellular macromolecule metabolic process;GO:002305…
547	gene25843	0	75	0.001	1.67667	8.92904	0.000267684	0.0149896	up	PDILT	PREDICTED: protein disulfide-isomerase-like protein of the testis isoform X1 [Ovis aries]	-	-	-	-	-	-	-
548	gene2589	223.335	62.3333	2.45667	0.713333	-1.76096	2.60767e-06	0.000924813	down	SLCO2A1	PREDICTED: solute carrier organic anion transporter family member 2A1 [Bos mutus]	-	-	-	-	-	-	-
549	gene25922	0.333333	34	0.01	0.935	5.99334	0.0010988	0.0328214	up	AQP8	PREDICTED: aquaporin-8 [Ovis aries]	Organismal Systems	Digestive system	ko04976//Bile secretion	K09869	-	-	-
550	gene25928	0	891.333	0.001	19.4933	12.4969	3.3978e-06	0.00115026	up	C24H16orf82	PREDICTED: protein TNT [Capra hircus]	-	-	-	-	-	-	-
551	gene25978	0	26	0.001	0.398333	7.41656	0.000864513	0.0288727	up	C24H16orf92	chromosome 16 open reading frame 92 precursor [Macaca mulatta]	-	-	-	-	-	-	-
552	gene26068	1.66667	233.5	0.198333	29.1267	6.74355	1.03832e-05	0.0023962	up	NUPR2	PREDICTED: nuclear transcriptional regulator 1-like protein [Ovis aries]	-	-	-	-	-	-	-
553	gene26110	1009.17	360.5	12.1417	4.565	-1.35431	1.67282e-05	0.00308891	down	ELN	PREDICTED: elastin isoform X3 [Ovis aries musimon]	Organismal Systems	Digestive system	ko04974//Protein digestion and absorption	K14211	-	-	-
554	gene26221	0.333333	49.5	0.015	2.41	6.5066	0.00189198	0.0452597	up	C24H7orf61	chromosome 7 open reading frame 61 [Macaca mulatta]	-	-	-	-	-	-	-
555	gene26342	77.8333	26.6667	2.84833	0.998333	-1.43998	0.000828915	0.0284056	down	LFNG	PREDICTED: beta-1,3-N-acetylglucosaminyltransferase lunatic fringe isoform X3 [Ovis aries musimon]	Environmental Information Processing;Metabolism	Signal transduction;Glycan biosynthesis and metabolism	ko04330//Notch signaling pathway;ko00514//Other types of O-glycan biosynthesis	K05948	GO:0098588//bounding membrane of organelle;GO:0044431//Golgi apparatus part;GO:0044446//intracellular organelle part;GO:0044464//cell part;GO:0005622//intracellular;GO:0044424//intracellular part;GO:0044422//organelle part;GO:0012505//endomembrane system;GO:0043226//organelle;GO:0043227//membrane-bounded organelle;GO:0043231//intracellular membrane-bounded organelle;GO:0016020//membrane;GO:000557…	GO:0003824//catalytic activity;GO:0043169//cation binding;GO:0016758//transferase activity, transferring hexosyl groups;GO:0008375//acetylglucosaminyltransferase activity;GO:0043167//ion binding;GO:0005488//binding;GO:0016740//transferase activity;GO:0008194//UDP-glycosyltransferase activity;GO:0016757//transferase activity, transferring glycosyl groups	GO:0051098//regulation of binding;GO:0061053//somite development;GO:0007389//pattern specification process;GO:0032501//multicellular organismal process;GO:0048513//animal organ development;GO:0048519//negative regulation of biological process;GO:0007275//multicellular organism development;GO:0002313//mature B cell differentiation involved in immune response;GO:0048731//system development;GO:00488…
556	gene2638	0	20.095	0.001	0.996667	7.04693	0.00219851	0.0497458	up	LOC101119693	PREDICTED: LOW QUALITY PROTEIN: IQ domain-containing protein F5-like isoform X1 [Ovis aries]	-	-	-	-	-	-	-
557	gene26454	190	67.8333	1.23	0.451667	-1.39046	8.26744e-06	0.00203014	down	SIPA1L2	PREDICTED: signal-induced proliferation-associated 1-like protein 2 isoform X1 [Ovis aries]	Environmental Information Processing	Signal transduction	ko04015//Rap1 signaling pathway	K17702	-	-	GO:0044763//single-organism cellular process;GO:0051716//cellular response to stimulus;GO:0050790//regulation of catalytic activity;GO:0050794//regulation of cellular process;GO:0009987//cellular process;GO:0050789//regulation of biological process;GO:0065007//biological regulation;GO:0043087//regulation of GTPase activity;GO:0051336//regulation of hydrolase activity;GO:0007154//cell communicatio…
558	gene26472	59	6	0.618333	0.0633333	-2.98946	0.000170671	0.0120674	down	LOC105604914	-	-	-	-	-	-	-	-
559	gene26519	537	163.5	7.06333	2.205	-1.51007	5.00195e-06	0.00141467	down	RET	PREDICTED: proto-oncogene tyrosine-protein kinase receptor Ret isoform X2 [Ovis aries musimon]	Cellular Processes	Transport and catabolism	ko04144//Endocytosis	K05126	GO:0044464//cell part;GO:0016020//membrane;GO:0071944//cell periphery;GO:0005622//intracellular;GO:0044437//vacuolar part;GO:0098805//whole membrane;GO:0044424//intracellular part;GO:0005623//cell;GO:0098588//bounding membrane of organelle;GO:0005737//cytoplasm;GO:0005773//vacuole;GO:0032991//macromolecular complex;GO:0044444//cytoplasmic part;GO:0043227//membrane-bounded organelle;GO:0043231//in…	GO:0005488//binding;GO:0001883//purine nucleoside binding;GO:0097159//organic cyclic compound binding;GO:0046872//metal ion binding;GO:0003824//catalytic activity;GO:0016301//kinase activity;GO:0016773//phosphotransferase activity, alcohol group as acceptor;GO:0004672//protein kinase activity;GO:0036094//small molecule binding;GO:0001882//nucleoside binding;GO:0016772//transferase activity, trans…	GO:0048483//autonomic nervous system development;GO:0071704//organic substance metabolic process;GO:0009888//tissue development;GO:0052548//regulation of endopeptidase activity;GO:0031325//positive regulation of cellular metabolic process;GO:0050896//response to stimulus;GO:0052547//regulation of peptidase activity;GO:0006468//protein phosphorylation;GO:0018130//heterocycle biosynthetic process;G…
560	gene26527	0	32.7267	0.001	0.81	7.73614	0.000956423	0.0302166	up	PHYHIPL	PREDICTED: phytanoyl-CoA hydroxylase-interacting protein-like isoform X1 [Ovis aries]	-	-	-	-	GO:0043229//intracellular organelle;GO:0043226//organelle;GO:0044424//intracellular part;GO:0043231//intracellular membrane-bounded organelle;GO:0005623//cell;GO:0044464//cell part;GO:0043227//membrane-bounded organelle;GO:0005622//intracellular	-	-
561	gene26558	559.5	169.333	3.07833	0.91	-1.6057	8.35668e-05	0.00821928	down	JMJD1C	PREDICTED: probable JmjC domain-containing histone demethylation protein 2C isoform X1 [Ovis aries]	-	-	-	-	-	-	-
562	gene2659	2.66667	49.1667	0.06	1.205	3.9091	0.00132412	0.0369349	up	RSPH1	PREDICTED: radial spoke head 1 homolog [Ovis aries]	-	-	-	-	-	-	-
563	gene26621	215	64.1667	1.205	0.376667	-1.67015	4.06076e-08	5.51748e-05	down	PALD1	PREDICTED: LOW QUALITY PROTEIN: paladin isoform X1 [Ovis aries]	-	-	-	-	-	-	-
564	gene26622	28.3333	87.3333	0.518333	1.655	1.58977	0.00151218	0.0394703	up	PRF1	PREDICTED: LOW QUALITY PROTEIN: perforin-1 [Ovis aries]	Organismal Systems	Immune system	ko04650//Natural killer cell mediated cytotoxicity	K07818	GO:0031224//intrinsic component of membrane;GO:0044425//membrane part;GO:0043231//intracellular membrane-bounded organelle;GO:0005737//cytoplasm;GO:0016020//membrane;GO:0043226//organelle;GO:0005764//lysosome;GO:0005773//vacuole;GO:0044464//cell part;GO:0043227//membrane-bounded organelle;GO:0043229//intracellular organelle;GO:0044444//cytoplasmic part;GO:0005623//cell;GO:0000323//lytic vacuole;G…	GO:0043167//ion binding;GO:0022803//passive transmembrane transporter activity;GO:0005488//binding;GO:0005215//transporter activity;GO:0022857//transmembrane transporter activity;GO:0015267//channel activity;GO:0046872//metal ion binding;GO:0043169//cation binding	GO:0065003//macromolecular complex assembly;GO:0002252//immune effector process;GO:0009987//cellular process;GO:0002347//response to tumor cell;GO:0022607//cellular component assembly;GO:0044699//single-organism process;GO:0006461//protein complex assembly;GO:0071840//cellular component organization or biogenesis;GO:0071822//protein complex subunit organization;GO:0044085//cellular component biog…
565	gene26624	0.166667	62.8333	0.00333333	1.46	7.43325	0.000489062	0.0210713	up	TBATA	PREDICTED: protein TBATA isoform X2 [Ovis aries]	-	-	-	-	GO:0005623//cell;GO:0005737//cytoplasm;GO:0044424//intracellular part;GO:0044444//cytoplasmic part;GO:0005622//intracellular;GO:0044464//cell part	-	GO:0044707//single-multicellular organism process;GO:0009987//cellular process;GO:0048609//multicellular organismal reproductive process;GO:0000003//reproduction;GO:0032502//developmental process;GO:0044699//single-organism process;GO:0007276//gamete generation;GO:0044767//single-organism developmental process;GO:0044763//single-organism cellular process;GO:0022414//reproductive process;GO:005170…
566	gene26662	86.6167	226.637	1.08	2.925	1.36895	0.00117179	0.0340902	up	CFAP70	PREDICTED: cilia- and flagella-associated protein 70 isoform X1 [Ovis aries]	-	-	-	-	-	-	-
567	gene26691	120.833	232	6.615	13.075	1.05505	0.00166766	0.0418658	up	COMTD1	PREDICTED: catechol O-methyltransferase domain-containing protein 1 isoform X2 [Ovis aries musimon]	-	-	-	-	GO:0044425//membrane part;GO:0016020//membrane;GO:0031224//intrinsic component of membrane	GO:0003824//catalytic activity;GO:0016740//transferase activity;GO:0008168//methyltransferase activity;GO:0016741//transferase activity, transferring one-carbon groups	GO:0008152//metabolic process
568	gene26723	0.333333	89.3333	0.0133333	3.60333	7.37911	0.000793151	0.0275773	up	DYDC1	PREDICTED: DPY30 domain-containing protein 1 [Ovis aries]	-	-	-	-	-	-	-
569	gene26775	0	25.5	0.001	0.318333	7.38186	0.00142103	0.0383163	up	LOC105605096	PREDICTED: zonadhesin-like isoform X1 [Ovis aries]	-	-	-	-	-	-	-
570	gene26791	0.166667	42.3333	0.00166667	0.588333	6.86799	0.00168101	0.0419651	up	LRRC18	PREDICTED: leucine-rich repeat-containing protein 18 isoform X2 [Bos taurus]	-	-	-	-	-	-	-
571	gene26793	0.5	37.1667	0.005	0.41	5.63962	0.000569427	0.0227819	up	FAM170B	PREDICTED: V-set and transmembrane domain-containing protein 4-like isoform X3 [Macaca fascicularis]	-	-	-	-	GO:0031410//cytoplasmic vesicle;GO:0098805//whole membrane;GO:0097708//intracellular vesicle;GO:0030659//cytoplasmic vesicle membrane;GO:0016020//membrane;GO:0044464//cell part;GO:0016023//cytoplasmic, membrane-bounded vesicle;GO:0031982//vesicle;GO:0043229//intracellular organelle;GO:0002080//acrosomal membrane;GO:0043227//membrane-bounded organelle;GO:0005623//cell;GO:0031090//organelle membran…	-	GO:0044703//multi-organism reproductive process;GO:0000003//reproduction;GO:0044702//single organism reproductive process;GO:0044699//single-organism process;GO:0019953//sexual reproduction;GO:0009566//fertilization;GO:0007340//acrosome reaction;GO:0051704//multi-organism process;GO:0022414//reproductive process;GO:0007338//single fertilization
572	gene26800	0	87	0.001	11.3167	9.14251	0.000221749	0.0136866	up	C25H10orf53	PREDICTED: UPF0728 protein C10orf53 homolog [Ovis aries]	-	-	-	-	-	-	-
573	gene26809	0	37.3267	0.001	0.626667	7.92743	0.000754575	0.0266764	up	LOC105605068	PREDICTED: disintegrin and metalloproteinase domain-containing protein 21-like [Ovis aries]	-	-	-	-	-	GO:0043169//cation binding;GO:0008233//peptidase activity;GO:0043167//ion binding;GO:0005488//binding;GO:0003824//catalytic activity;GO:0070011//peptidase activity, acting on L-amino acid peptides;GO:0046872//metal ion binding;GO:0046914//transition metal ion binding;GO:0016787//hydrolase activity	GO:0019538//protein metabolic process;GO:0008152//metabolic process;GO:0043170//macromolecule metabolic process;GO:0044238//primary metabolic process;GO:0071704//organic substance metabolic process
574	gene26949	127.667	37.3333	4.9	1.51833	-1.61671	9.91911e-05	0.00877636	down	FGL1	PREDICTED: fibrinogen-like protein 1 [Capra hircus]	-	-	-	-	-	-	-
575	gene26974	695.998	299.333	5.96333	2.56667	-1.13601	0.000476893	0.020811	down	DLC1	PREDICTED: rho GTPase-activating protein 7 isoform X2 [Ovis aries]	-	-	-	-	GO:0005924//cell-substrate adherens junction;GO:0098590//plasma membrane region;GO:0005856//cytoskeleton;GO:0043228//non-membrane-bounded organelle;GO:0044459//plasma membrane part;GO:0043226//organelle;GO:0005622//intracellular;GO:0044444//cytoplasmic part;GO:0043231//intracellular membrane-bounded organelle;GO:0016020//membrane;GO:0070161//anchoring junction;GO:0015629//actin cytoskeleton;GO:00…	GO:0005488//binding;GO:0019904//protein domain specific binding;GO:0005515//protein binding	GO:0080090//regulation of primary metabolic process;GO:0032270//positive regulation of cellular protein metabolic process;GO:0010952//positive regulation of peptidase activity;GO:0044700//single organism signaling;GO:0044093//positive regulation of molecular function;GO:0051674//localization of cell;GO:0031325//positive regulation of cellular metabolic process;GO:0044238//primary metabolic proces…
576	gene26976	43	9.16667	0.636667	0.145	-2.12349	0.000207102	0.0131737	down	KIAA1456	PREDICTED: probable tRNA methyltransferase 9-like protein isoform X1 [Ovis aries]	-	-	-	-	-	GO:0016741//transferase activity, transferring one-carbon groups;GO:0003824//catalytic activity;GO:0016740//transferase activity	GO:0008152//metabolic process
577	gene27007	129.187	230.663	1.19667	2.22333	1.01292	0.0014633	0.0390614	up	GSR	PREDICTED: glutathione reductase, mitochondrial isoform X2 [Ovis aries musimon]	Organismal Systems;Metabolism	Metabolism of other amino acids;Endocrine system	ko04918//Thyroid hormone synthesis;ko00480//Glutathione metabolism	K00383	GO:0043231//intracellular membrane-bounded organelle;GO:1903561//extracellular vesicle;GO:0044424//intracellular part;GO:0071944//cell periphery;GO:0031982//vesicle;GO:0043227//membrane-bounded organelle;GO:0016020//membrane;GO:0043226//organelle;GO:0005623//cell;GO:0005576//extracellular region;GO:0005886//plasma membrane;GO:0044464//cell part;GO:0005622//intracellular;GO:0044421//extracellular …	GO:0097159//organic cyclic compound binding;GO:0016491//oxidoreductase activity;GO:0016651//oxidoreductase activity, acting on NAD(P)H;GO:1901363//heterocyclic compound binding;GO:0000166//nucleotide binding;GO:0003824//catalytic activity;GO:0036094//small molecule binding;GO:1901265//nucleoside phosphate binding;GO:0005488//binding	GO:0006790//sulfur compound metabolic process;GO:0009636//response to toxic substance;GO:0065007//biological regulation;GO:0042592//homeostatic process;GO:0019725//cellular homeostasis;GO:1990748//cellular detoxification;GO:0044699//single-organism process;GO:0044763//single-organism cellular process;GO:0065008//regulation of biological quality;GO:0050896//response to stimulus;GO:0044710//single-…
578	gene27045	381.667	126	4.36	1.5	-1.49162	4.19805e-08	5.51748e-05	down	ADGRA2	PREDICTED: G-protein coupled receptor 124 isoform X2 [Ovis aries musimon]	-	-	-	-	GO:0005623//cell;GO:0044425//membrane part;GO:0031224//intrinsic component of membrane;GO:0016020//membrane;GO:0044464//cell part	GO:0004871//signal transducer activity;GO:0060089//molecular transducer activity;GO:0004872//receptor activity;GO:0099600//transmembrane receptor activity;GO:0038023//signaling receptor activity;GO:0004888//transmembrane signaling receptor activity	GO:0032502//developmental process;GO:2000145//regulation of cell motility;GO:0042330//taxis;GO:0010646//regulation of cell communication;GO:0050896//response to stimulus;GO:0048731//system development;GO:0044699//single-organism process;GO:0044767//single-organism developmental process;GO:0001525//angiogenesis;GO:0045595//regulation of cell differentiation;GO:0048519//negative regulation of biolo…
579	gene27071	0	44	0.001	0.793333	8.16613	0.000333203	0.0166232	up	LOC101119791	PREDICTED: disintegrin and metalloproteinase domain-containing protein 5-like isoform X1 [Ovis aries]	-	-	-	-	GO:0031224//intrinsic component of membrane;GO:0044425//membrane part;GO:0016020//membrane	GO:0003824//catalytic activity;GO:0043169//cation binding;GO:0046872//metal ion binding;GO:0043167//ion binding;GO:0046914//transition metal ion binding;GO:0016787//hydrolase activity;GO:0005488//binding;GO:0070011//peptidase activity, acting on L-amino acid peptides;GO:0008233//peptidase activity	GO:0044699//single-organism process;GO:0051716//cellular response to stimulus;GO:0007154//cell communication;GO:0023052//signaling;GO:0050896//response to stimulus;GO:0050789//regulation of biological process;GO:0007166//cell surface receptor signaling pathway;GO:0043170//macromolecule metabolic process;GO:0050794//regulation of cellular process;GO:0044763//single-organism cellular process;GO:000…
580	gene27073	0	29.3333	0.001	0.543333	7.58209	0.00113737	0.0336085	up	ADAM2	PREDICTED: disintegrin and metalloproteinase domain-containing protein 2 isoform X1 [Ovis aries]	-	-	-	-	GO:0044464//cell part;GO:0044425//membrane part;GO:0016020//membrane;GO:0031224//intrinsic component of membrane;GO:0005623//cell	GO:0016787//hydrolase activity;GO:0003824//catalytic activity;GO:0043169//cation binding;GO:0046872//metal ion binding;GO:0070011//peptidase activity, acting on L-amino acid peptides;GO:0046914//transition metal ion binding;GO:0043167//ion binding;GO:0005488//binding;GO:0008233//peptidase activity	GO:0071704//organic substance metabolic process;GO:0044699//single-organism process;GO:0007632//visual behavior;GO:0009628//response to abiotic stimulus;GO:0043170//macromolecule metabolic process;GO:0044238//primary metabolic process;GO:0019538//protein metabolic process;GO:0009416//response to light stimulus;GO:0044707//single-multicellular organism process;GO:0008152//metabolic process;GO:0009…
581	gene2709	539.833	204	4.935	2.225	-1.31412	4.09484e-07	0.000255101	down	ADARB1	PREDICTED: double-stranded RNA-specific editase 1 isoform X9 [Ovis aries musimon]	-	-	-	-	GO:0043229//intracellular organelle;GO:0070013//intracellular organelle lumen;GO:0044464//cell part;GO:0031981//nuclear lumen;GO:0044428//nuclear part;GO:0043233//organelle lumen;GO:0043227//membrane-bounded organelle;GO:0005623//cell;GO:0031974//membrane-enclosed lumen;GO:0005622//intracellular;GO:0043226//organelle;GO:0044422//organelle part;GO:0043231//intracellular membrane-bounded organelle;…	GO:0097159//organic cyclic compound binding;GO:0003723//RNA binding;GO:0016814//hydrolase activity, acting on carbon-nitrogen (but not peptide) bonds, in cyclic amidines;GO:0005488//binding;GO:1901363//heterocyclic compound binding;GO:0003824//catalytic activity;GO:0004000//adenosine deaminase activity;GO:0019239//deaminase activity;GO:0016810//hydrolase activity, acting on carbon-nitrogen (but n…	GO:0031323//regulation of cellular metabolic process;GO:0048870//cell motility;GO:0010467//gene expression;GO:0043086//negative regulation of catalytic activity;GO:0051674//localization of cell;GO:0008152//metabolic process;GO:0045936//negative regulation of phosphate metabolic process;GO:0007049//cell cycle;GO:0043412//macromolecule modification;GO:0051174//regulation of phosphorus metabolic pro…
582	gene27196	169.167	51.8333	1.55333	0.49	-1.58616	0.000118286	0.0097002	down	LOC105605335	-	-	-	-	-	-	-	-
583	gene27204	0	159.355	0.001	21.99	10.0136	0.000104579	0.00893829	up	LOC105605341	-	-	-	-	-	-	-	-
584	gene27214	1.5	499.978	0.205	70.805	7.98574	8.26848e-06	0.00203014	up	LOC106990249	-	-	-	-	-	-	-	-
585	gene27271	6.16667	0.833333	0.835	0.116667	-2.61412	0.00211956	0.0485716	down	S100G	protein S100-G [Bos taurus]	Organismal Systems	Digestive system	ko04978//Mineral absorption	K14734	GO:0005886//plasma membrane;GO:0071944//cell periphery;GO:0044464//cell part;GO:0016020//membrane;GO:0005623//cell	GO:0043169//cation binding;GO:0043167//ion binding;GO:0046872//metal ion binding;GO:0005488//binding	-
586	gene27409	0	85.1717	0.001	9.88333	9.11187	0.000227981	0.0139174	up	LOC105605424	PREDICTED: histone H2A-Bbd type 1-like [Ovis aries]	-	-	-	-	-	-	-
587	gene27426	0.166667	63.1617	0.00666667	2.85167	7.44931	0.000196832	0.0127393	up	LOC101120811	PREDICTED: histone H2A-Bbd type 1-like isoform X1 [Ovis aries]	-	-	-	-	-	-	-
588	gene27489	155.5	48.1667	3.59667	1.11333	-1.57147	1.61749e-05	0.00308885	down	ARHGEF9	PREDICTED: rho guanine nucleotide exchange factor 9 isoform X1 [Bubalus bubalis]	-	-	-	-	GO:0044464//cell part;GO:0005622//intracellular;GO:0044424//intracellular part;GO:0005623//cell	GO:0098772//molecular function regulator	GO:0050789//regulation of biological process;GO:0023052//signaling;GO:0050794//regulation of cellular process;GO:0065009//regulation of molecular function;GO:0050790//regulation of catalytic activity;GO:0044763//single-organism cellular process;GO:0050896//response to stimulus;GO:0044700//single organism signaling;GO:0007265//Ras protein signal transduction;GO:0007266//Rho protein signal transduc…
589	gene27552	554.667	262	9.81167	4.80333	-1.05257	2.88206e-05	0.00456694	down	LOC101122329	PREDICTED: LOW QUALITY PROTEIN: melanoma-associated antigen D4 isoform X1 [Ovis aries]	-	-	-	-	-	-	-
590	gene27562	544.333	237.833	3.485	1.54667	-1.11787	0.000312241	0.016262	down	SHROOM4	PREDICTED: protein Shroom4 isoform X2 [Ovis aries]	Cellular Processes	Cellular commiunity	ko04530//Tight junction	K18625	GO:0044424//intracellular part;GO:0043226//organelle;GO:0044446//intracellular organelle part;GO:0044459//plasma membrane part;GO:0005886//plasma membrane;GO:0044464//cell part;GO:0005884//actin filament;GO:0099081//supramolecular polymer;GO:0044430//cytoskeletal part;GO:0016459//myosin complex;GO:0016323//basolateral plasma membrane;GO:0071944//cell periphery;GO:0099513//polymeric cytoskeletal f…	GO:0005515//protein binding;GO:0008092//cytoskeletal protein binding;GO:0003779//actin binding;GO:0005488//binding	GO:0009987//cellular process;GO:0071840//cellular component organization or biogenesis;GO:0032501//multicellular organismal process;GO:0044707//single-multicellular organism process;GO:0003008//system process;GO:0044699//single-organism process;GO:0007399//nervous system development;GO:0016043//cellular component organization;GO:0030036//actin cytoskeleton organization;GO:0044763//single-organism…
591	gene27700	87.6667	197.167	2.815	6.59167	1.20658	0.00145761	0.0390001	up	IL2RG	PREDICTED: cytokine receptor common subunit gamma [Ovis aries]	Cellular Processes;Environmental Information Processing	Signal transduction;Transport and catabolism;Signaling molecules and interaction	ko04151//PI3K-Akt signaling pathway;ko04144//Endocytosis;ko04060//Cytokine-cytokine receptor interaction;ko04630//Jak-STAT signaling pathway	K05070	GO:0031224//intrinsic component of membrane;GO:0016020//membrane;GO:0044425//membrane part	-	GO:0007166//cell surface receptor signaling pathway;GO:0044699//single-organism process;GO:0044763//single-organism cellular process;GO:0050794//regulation of cellular process;GO:0023052//signaling;GO:0044700//single organism signaling;GO:0051716//cellular response to stimulus;GO:0007154//cell communication;GO:0050896//response to stimulus;GO:0050789//regulation of biological process;GO:0007165//…
592	gene27827	36.3333	10.3333	0.315	0.0933333	-1.77032	0.0018167	0.0440722	down	ZNF711	PREDICTED: zinc finger protein 711 isoform X1 [Pantholops hodgsonii]	-	-	-	-	-	-	-
593	gene27950	1.16667	159.5	0.0566667	7.98167	6.64488	0.00115164	0.0338123	up	FATE1	PREDICTED: fetal and adult testis-expressed transcript protein isoform X1 [Ovis aries]	-	-	-	-	GO:0044425//membrane part;GO:0031224//intrinsic component of membrane;GO:0016020//membrane	-	-
594	gene27951	298.167	141.667	1.62167	0.796667	-1.06237	0.000278047	0.0151522	down	PRRG3	PREDICTED: transmembrane gamma-carboxyglutamic acid protein 3 [Capra hircus]	-	-	-	-	GO:0044425//membrane part;GO:0031224//intrinsic component of membrane;GO:0016020//membrane	-	-
595	gene27991	124.5	19.5	1.51	0.245	-2.62122	9.65718e-09	1.65977e-05	down	SLITRK2	PREDICTED: SLIT and NTRK-like protein 2 [Ovis aries]	-	-	-	-	GO:0031224//intrinsic component of membrane;GO:0016020//membrane;GO:0044425//membrane part	-	GO:0048856//anatomical structure development;GO:0044763//single-organism cellular process;GO:0048731//system development;GO:0044699//single-organism process;GO:0009987//cellular process;GO:0044085//cellular component biogenesis;GO:0044767//single-organism developmental process;GO:0032501//multicellular organismal process;GO:0007416//synapse assembly;GO:0050808//synapse organization;GO:0007399//ne…
596	gene27993	0	26.3783	0.001	3.25333	7.42782	0.00134812	0.0374176	up	LOC101119959	PREDICTED: spermatid nuclear transition protein 3-like [Ovis aries]	-	-	-	-	-	-	-
597	gene28012	15.4533	0.553333	2.06833	0.0683333	-4.14117	0.000192424	0.0127274	down	LOC105605706	PREDICTED: adenylyl cyclase-associated protein 1-like [Ovis aries]	-	-	-	-	GO:0043230//extracellular organelle;GO:0031982//vesicle;GO:0043229//intracellular organelle;GO:0005924//cell-substrate adherens junction;GO:0030054//cell junction;GO:0043226//organelle;GO:0030055//cell-substrate junction;GO:1903561//extracellular vesicle;GO:0015629//actin cytoskeleton;GO:0044464//cell part;GO:0043227//membrane-bounded organelle;GO:0005912//adherens junction;GO:0070161//anchoring …	GO:0005515//protein binding;GO:0005488//binding;GO:0008092//cytoskeletal protein binding	GO:0048870//cell motility;GO:0043085//positive regulation of catalytic activity;GO:0030817//regulation of cAMP biosynthetic process;GO:0030814//regulation of cAMP metabolic process;GO:0031326//regulation of cellular biosynthetic process;GO:0045761//regulation of adenylate cyclase activity;GO:0030816//positive regulation of cAMP metabolic process;GO:0030810//positive regulation of nucleotide biosy…
598	gene28080	0	24.9217	0.001	1.18833	7.35357	0.00147727	0.0391589	up	LOC105605583	PREDICTED: nuclear localization sequence-binding protein-like isoform X1 [Ovis aries]	-	-	-	-	-	-	-
599	gene28145	324.833	93.5	4.34	1.295	-1.71674	0.0014273	0.0383757	down	LOC105605603	-	-	-	-	-	-	-	-
600	gene28188	480	221.667	23.79	11.27	-1.03571	5.13337e-06	0.00143368	down	PGRMC1	PREDICTED: membrane-associated progesterone receptor component 1 [Pantholops hodgsonii]	-	-	-	-	-	-	-
601	gene28191	478.333	215	2.80833	1.31333	-1.06285	0.00092033	0.0296989	down	LONRF3	PREDICTED: LON peptidase N-terminal domain and RING finger protein 3 isoform X1 [Ovis aries]	-	-	-	-	-	GO:0005488//binding;GO:0046914//transition metal ion binding;GO:0043169//cation binding;GO:0043167//ion binding;GO:0046872//metal ion binding	GO:0019538//protein metabolic process;GO:0043170//macromolecule metabolic process;GO:0044238//primary metabolic process;GO:0071704//organic substance metabolic process;GO:0008152//metabolic process
602	gene28214	34.8333	10	0.4	0.121667	-1.77805	0.00219974	0.0497458	down	KLHL4	PREDICTED: kelch-like protein 4 isoform X1 [Ovis aries]	-	-	-	-	-	-	-
603	gene2824	1778.17	734.667	18.275	7.86667	-1.18906	4.53025e-08	5.6233e-05	down	PXDN	PREDICTED: LOW QUALITY PROTEIN: peroxidasin homolog isoform X1, partial [Ovis aries]	-	-	-	-	-	-	-
604	gene28295	0	21.3417	0.001	1.695	7.12714	0.00195879	0.0460687	up	LOC101122255	PREDICTED: histone H2B-like [Ovis aries]	-	-	-	-	GO:0043229//intracellular organelle;GO:0044424//intracellular part;GO:0005622//intracellular;GO:0044464//cell part;GO:0043228//non-membrane-bounded organelle;GO:0043227//membrane-bounded organelle;GO:0043232//intracellular non-membrane-bounded organelle;GO:0043231//intracellular membrane-bounded organelle;GO:0005623//cell;GO:0043226//organelle	GO:0003676//nucleic acid binding;GO:0097159//organic cyclic compound binding;GO:0005515//protein binding;GO:0046983//protein dimerization activity;GO:1901363//heterocyclic compound binding;GO:0005488//binding	-
605	gene2834	0	61.6667	0.001	1.75833	8.64845	0.000167444	0.0119771	up	ALLC	PREDICTED: probable allantoicase [Ovis aries]	Metabolism	Nucleotide metabolism	ko00230//Purine metabolism	K01477	-	-	-
606	gene28346	0	30.6667	0.001	0.788333	7.64958	0.000596769	0.0233281	up	LOC101122504	PREDICTED: T-complex protein 11 X-linked protein 2-like [Ovis aries]	-	-	-	-	-	-	-
607	gene28379	0	25.0117	0.001	1.36667	7.35553	0.000761756	0.0268453	up	LOC101105478	PREDICTED: histone H2B 1/2-like [Ovis aries]	-	-	-	-	GO:0043226//organelle;GO:0044424//intracellular part;GO:0043231//intracellular membrane-bounded organelle;GO:0043228//non-membrane-bounded organelle;GO:0043232//intracellular non-membrane-bounded organelle;GO:0005623//cell;GO:0043229//intracellular organelle;GO:0005622//intracellular;GO:0043227//membrane-bounded organelle;GO:0044464//cell part	GO:0003676//nucleic acid binding;GO:1901363//heterocyclic compound binding;GO:0005488//binding;GO:0097159//organic cyclic compound binding;GO:0046983//protein dimerization activity;GO:0005515//protein binding	-
608	gene28413	0	42	0.001	32.7033	8.0963	0.00062286	0.0238706	up	DNAJB8	PREDICTED: dnaJ homolog subfamily B member 8 isoform X2 [Ovis aries musimon]	-	-	-	-	-	GO:0005488//binding;GO:0005515//protein binding	GO:0009987//cellular process
609	gene28550	75.3333	329	1.65333	7.725	2.07671	0.000144369	0.0108855	up	LOC101113211	IG mu chain precursor [Ovis aries]	-	-	-	-	-	-	-
610	gene28602	0	44.1333	0.001	0.47	8.16845	0.00057264	0.0228316	up	LOC101103134	PREDICTED: disintegrin and metalloproteinase domain-containing protein 20-like isoform X1 [Ovis aries]	-	-	-	-	-	GO:0046914//transition metal ion binding;GO:0070011//peptidase activity, acting on L-amino acid peptides;GO:0003824//catalytic activity;GO:0043169//cation binding;GO:0005488//binding;GO:0043167//ion binding;GO:0016787//hydrolase activity;GO:0008233//peptidase activity;GO:0046872//metal ion binding	GO:0019538//protein metabolic process;GO:0071704//organic substance metabolic process;GO:0043170//macromolecule metabolic process;GO:0008152//metabolic process;GO:0044238//primary metabolic process
611	gene28815	12.3333	329.167	0.4	10.9883	4.51449	0.000248385	0.0145673	up	TSSK2	PREDICTED: testis-specific serine/threonine-protein kinase 2 [Ovis aries]	-	-	-	-	-	-	-
612	gene28817	5.98667	22.5217	1.185	4.48833	1.98107	0.00156267	0.0403637	up	LOC105605903	PREDICTED: alcohol dehydrogenase class-2 isozyme 1-like isoform X1 [Ovis aries]	-	-	-	-	-	GO:0003824//catalytic activity;GO:0043167//ion binding;GO:0036094//small molecule binding;GO:0004022//alcohol dehydrogenase (NAD) activity;GO:0016903//oxidoreductase activity, acting on the aldehyde or oxo group of donors;GO:0005501//retinoid binding;GO:0004033//aldo-keto reductase (NADP) activity;GO:0008106//alcohol dehydrogenase (NADP+) activity;GO:0046872//metal ion binding;GO:1901363//heteroc…	GO:0042180//cellular ketone metabolic process;GO:0001523//retinoid metabolic process;GO:0044699//single-organism process;GO:0006720//isoprenoid metabolic process;GO:0044238//primary metabolic process;GO:0044255//cellular lipid metabolic process;GO:0006067//ethanol metabolic process;GO:0006629//lipid metabolic process;GO:0016101//diterpenoid metabolic process;GO:0044237//cellular metabolic process…
613	gene28845	4.655	217.972	0.56	27.27	5.23256	0.000168858	0.0119771	up	LOC101108295	PREDICTED: LOW QUALITY PROTEIN: tubulin alpha chain isoform X1, partial [Ovis aries]	Cellular Processes	Cellular commiunity;Transport and catabolism	ko04145//Phagosome;ko04540//Gap junction	K07374	-	-	-
614	gene28850	0	18.8333	0.001	2.04833	7.54469	0.00163054	0.0414832	up	LOC101109783	PREDICTED: LOW QUALITY PROTEIN: apolipoprotein L3-like isoform X1, partial [Ovis aries]	-	-	-	-	GO:0044425//membrane part;GO:0031224//intrinsic component of membrane;GO:0016020//membrane	GO:0005488//binding	GO:0051179//localization;GO:0071704//organic substance metabolic process;GO:0043170//macromolecule metabolic process;GO:0044238//primary metabolic process;GO:0008152//metabolic process;GO:0010876//lipid localization;GO:0033036//macromolecule localization;GO:0019538//protein metabolic process
615	gene28876	0	486.368	0.001	56.28	11.6242	3.69918e-06	0.00122406	up	LOC106992029	spermatid nuclear transition protein 3 [Ovis aries]	-	-	-	-	-	-	-
616	gene28963	72	11.8367	0.833333	0.136667	-2.52686	5.6719e-05	0.00673575	down	LOC106992034	-	-	-	-	-	-	-	-
617	gene28992	25.3333	1.66667	0.39	0.0333333	-3.60334	0.000346063	0.0169772	down	LOC105605978	PREDICTED: tumor necrosis factor receptor superfamily member 26-like isoform X1 [Ovis aries]	-	-	-	-	-	-	-
618	gene29054	0	104.542	0.001	44.065	9.40668	8.16296e-05	0.0081787	up	LOC443035	spermatid nuclear transition protein 3 [Ovis aries]	-	-	-	-	-	-	-
619	gene29080	1086.01	2550.72	22.97	55.5417	1.2744	0.000134625	0.0104876	up	LOC101113217	PREDICTED: BOLA class I histocompatibility antigen, alpha chain BL3-7-like isoform X1 [Ovis aries]	Organismal Systems;Cellular Processes;Environmental Information Processing	Immune system;Transport and catabolism;Signaling molecules and interaction	ko04144//Endocytosis;ko04145//Phagosome;ko04514//Cell adhesion molecules (CAMs);ko04650//Natural killer cell mediated cytotoxicity;ko04612//Antigen processing and presentation	K06751	-	-	-
620	gene29113	155.665	21.98	33.7283	4.905	-2.60264	1.85221e-07	0.000146921	down	LOC105601850	PREDICTED: C-type natriuretic peptide-like, partial [Ovis aries]	Organismal Systems	Circulatory system	ko04270//Vascular smooth muscle contraction	K12336	-	-	-
621	gene29212	0.333333	26.2083	0.0183333	1.64333	5.63528	0.00209226	0.0480941	up	LOC101116892	PREDICTED: serpin A3-1-like [Ovis aries]	-	-	-	-	-	-	-
622	gene2933	0	29.8333	0.001	3.64167	7.61083	0.000652347	0.0242303	up	TXNDC8	PREDICTED: thioredoxin domain-containing protein 8 isoform X2 [Ovis aries]	-	-	-	-	-	-	-
623	gene2941	0	140.833	0.001	3.005	9.83584	0.000120774	0.00974174	up	LOC105606785	-	-	-	-	-	-	-	-
624	gene2949	0.666667	144.333	0.02	4.09833	7.29591	0.000280112	0.0151906	up	ACTL7A	PREDICTED: actin-like protein 7A [Ovis aries]	-	-	-	-	GO:0043228//non-membrane-bounded organelle;GO:0005929//cilium;GO:0043232//intracellular non-membrane-bounded organelle;GO:0042995//cell projection;GO:0032991//macromolecular complex;GO:0043227//membrane-bounded organelle;GO:0044464//cell part;GO:0005622//intracellular;GO:0005623//cell;GO:0043231//intracellular membrane-bounded organelle;GO:0044424//intracellular part;GO:0043226//organelle;GO:0043…	-	-
625	gene2950	0.333333	371.333	0.01	13.1067	9.34802	9.18252e-05	0.00841096	up	ACTL7B	PREDICTED: actin-like protein 7B [Ovis aries]	-	-	-	-	GO:0043226//organelle;GO:0044464//cell part;GO:0043229//intracellular organelle;GO:0005623//cell;GO:0043232//intracellular non-membrane-bounded organelle;GO:0044424//intracellular part;GO:0005622//intracellular;GO:0043228//non-membrane-bounded organelle	-	-
626	gene2998	0	90.3333	0.001	2.81167	9.20249	2.49213e-05	0.0041866	up	PPP3R2	PREDICTED: calcineurin subunit B type 2 [Ovis aries]	Cellular Processes;Organismal Systems;Environmental Information Processing	Nervous system;Cell growth and death;Immune system;Signal transduction;Development;Endocrine system	ko04010//MAPK signaling pathway;ko04020//Calcium signaling pathway;ko04022//cGMP - PKG signaling pathway;ko04921//Oxytocin signaling pathway;ko04310//Wnt signaling pathway;ko04650//Natural killer cell mediated cytotoxicity;ko04380//Osteoclast differentiation;ko04360//Axon guidance;ko04114//Oocyte meiosis;ko04724//Glutamatergic synapse;ko04660//T cell receptor signaling pathway;ko04922//Glucagon s…	K06268	-	GO:0043169//cation binding;GO:0043167//ion binding;GO:0005488//binding	-
627	gene3052	0.166667	38	0.00166667	0.328333	6.74682	0.00197445	0.0462831	up	LOC105611660	PREDICTED: spermatogenesis-associated protein 31E1-like isoform X1 [Ovis aries]	-	-	-	-	-	-	-
628	gene3075	164.333	51.8333	2.35	0.755	-1.55716	0.000119302	0.00971217	down	ASPN	PREDICTED: asporin [Ovis aries]	-	-	-	-	-	-	-
629	gene3141	0	23.5	0.001	0.166667	7.27097	0.000968032	0.030463	up	FAM205A	PREDICTED: protein FAM205A isoform X3 [Ovis aries]	-	-	-	-	GO:0016020//membrane;GO:0031224//intrinsic component of membrane;GO:0044425//membrane part	-	-
630	gene3155	2.805	115.223	0.0616667	3.43333	5.01924	0.000278	0.0151522	up	C2H9orf24	PREDICTED: spermatid-specific manchette-related protein 1 isoform X1 [Ovis aries]	-	-	-	-	-	-	-
631	gene3232	640.667	232.667	8.17333	3.08333	-1.29444	4.76635e-05	0.0064103	down	BMP1	PREDICTED: bone morphogenetic protein 1 isoform X2 [Ovis aries musimon]	-	-	-	-	-	-	-
632	gene3256	0	23	0.001	0.14	7.23448	0.0017198	0.0425068	up	LOC105607498	PREDICTED: spermatogenesis-associated protein 31E1-like isoform X1 [Ovis aries]	-	-	-	-	-	-	-
633	gene3261	0	54.3333	0.001	0.215	8.46582	0.000416382	0.0192057	up	LOC101102295	PREDICTED: spermatogenesis-associated protein 31C2-like isoform X1 [Ovis aries]	-	-	-	-	-	-	-
634	gene3262	0	38.8333	0.001	1.26833	7.9839	0.000708152	0.025561	up	LOC101102546	LOC527795 protein [Bos taurus]	-	-	-	-	-	-	GO:0019538//protein metabolic process;GO:0044238//primary metabolic process;GO:0071704//organic substance metabolic process;GO:0008152//metabolic process;GO:0043170//macromolecule metabolic process
635	gene3279	4541.17	1625.33	38.7117	14.1867	-1.36412	2.23445e-06	0.000832073	down	COL15A1	PREDICTED: collagen alpha-1(XV) chain isoform X1 [Ovis aries]	Organismal Systems	Digestive system	ko04974//Protein digestion and absorption	K08135	GO:0005576//extracellular region;GO:0044421//extracellular region part	-	-
636	gene3285	1.66667	41.6667	0.0166667	0.418333	4.28739	0.00122741	0.0349797	up	CORO2A	PREDICTED: coronin-2A isoform X1 [Ovis aries musimon]	-	-	-	-	-	-	-
637	gene3300	0.666667	47.5	0.005	0.358333	5.69519	0.00191142	0.0454703	up	CCDC180	PREDICTED: LOW QUALITY PROTEIN: coiled-coil domain-containing protein 180 isoform X1 [Ovis aries]	-	-	-	-	-	-	-
638	gene3327	12.3333	144.167	0.0866667	1.05	3.32774	0.00102199	0.0313228	up	CCIN	PREDICTED: calicin [Ovis aries]	-	-	-	-	-	-	-
639	gene3371	0.166667	70.6667	0.00166667	0.586667	7.6696	9.18531e-05	0.00841096	up	C2H9orf131	Chromosome 9 open reading frame 131 [Homo sapiens]	-	-	-	-	-	-	-
640	gene3385	74.3333	609.5	1.58333	12.8033	3.46124	0.000908761	0.0296035	up	PSAT1	PREDICTED: phosphoserine aminotransferase [Ovis aries]	Metabolism	Metabolism of cofactors and vitamins;Amino acid metabolism;Global and Overview	ko01200//Carbon metabolism;ko01230//Biosynthesis of amino acids;ko00260//Glycine, serine and threonine metabolism;ko00750//Vitamin B6 metabolism	K00831	GO:0005737//cytoplasm;GO:0005576//extracellular region;GO:0005622//intracellular;GO:0043230//extracellular organelle;GO:0044421//extracellular region part;GO:0043227//membrane-bounded organelle;GO:0043226//organelle;GO:0044464//cell part;GO:0044424//intracellular part;GO:0031982//vesicle;GO:0005623//cell;GO:1903561//extracellular vesicle;GO:0044444//cytoplasmic part	GO:0003824//catalytic activity;GO:0016740//transferase activity;GO:0008483//transaminase activity;GO:0016769//transferase activity, transferring nitrogenous groups	GO:0034641//cellular nitrogen compound metabolic process;GO:1901360//organic cyclic compound metabolic process;GO:0006766//vitamin metabolic process;GO:0008152//metabolic process;GO:0006767//water-soluble vitamin metabolic process;GO:1901605//alpha-amino acid metabolic process;GO:0006082//organic acid metabolic process;GO:0006807//nitrogen compound metabolic process;GO:0009069//serine family amin…
641	gene3408	1913.17	567.5	22.4	6.85167	-1.5513	1.6353e-05	0.00308891	down	CARNMT1	PREDICTED: UPF0586 protein C9orf41 homolog isoform X3 [Ovis aries musimon]	-	-	-	-	GO:0043231//intracellular membrane-bounded organelle;GO:0044444//cytoplasmic part;GO:0044464//cell part;GO:0005737//cytoplasm;GO:0005623//cell;GO:0043227//membrane-bounded organelle;GO:0043226//organelle;GO:0044424//intracellular part;GO:0005622//intracellular;GO:0043229//intracellular organelle	GO:0016741//transferase activity, transferring one-carbon groups;GO:0008757//S-adenosylmethionine-dependent methyltransferase activity;GO:0008168//methyltransferase activity;GO:0016740//transferase activity;GO:0003824//catalytic activity	GO:0008152//metabolic process;GO:0006518//peptide metabolic process;GO:0006807//nitrogen compound metabolic process;GO:0044237//cellular metabolic process;GO:0034641//cellular nitrogen compound metabolic process;GO:0043603//cellular amide metabolic process;GO:0009987//cellular process;GO:1901564//organonitrogen compound metabolic process;GO:0071704//organic substance metabolic process
642	gene3440	0	21.1667	0.001	1	7.12157	0.00115637	0.0338451	up	C2H9orf135	PREDICTED: MAM domain-containing protein 2 isoform X4 [Felis catus]	-	-	-	-	-	-	-
643	gene3553	19.1667	4	0.235	0.0583333	-2.0725	0.00135259	0.0374484	down	FREM1	PREDICTED: FRAS1-related extracellular matrix protein 1 isoform X1 [Ovis aries]	-	-	-	-	GO:0031224//intrinsic component of membrane;GO:0016020//membrane;GO:0044425//membrane part	-	GO:0048856//anatomical structure development;GO:0044763//single-organism cellular process;GO:0044699//single-organism process;GO:0032502//developmental process;GO:0031589//cell-substrate adhesion;GO:0007155//cell adhesion;GO:0022610//biological adhesion;GO:0009653//anatomical structure morphogenesis;GO:0009987//cellular process
644	gene3583	420	163.167	6.00167	2.36333	-1.24259	5.69779e-05	0.00673575	down	MLLT3	PREDICTED: protein AF-9 isoform X2 [Ovis aries]	-	-	-	-	GO:0043226//organelle;GO:0043227//membrane-bounded organelle;GO:0032991//macromolecular complex;GO:0005576//extracellular region;GO:0043230//extracellular organelle;GO:1903561//extracellular vesicle;GO:0043234//protein complex;GO:0044421//extracellular region part;GO:0031982//vesicle	-	GO:0007154//cell communication;GO:2000027//regulation of organ morphogenesis;GO:0044700//single organism signaling;GO:0065007//biological regulation;GO:0044763//single-organism cellular process;GO:0032502//developmental process;GO:0044699//single-organism process;GO:0048519//negative regulation of biological process;GO:0007165//signal transduction;GO:0023052//signaling;GO:0050794//regulation of c…
645	gene3644	0.833333	24.1667	0.0133333	0.378333	4.46722	0.00149777	0.0392637	up	EQTN	PREDICTED: equatorin [Ovis aries]	-	-	-	-	GO:0005768//endosome;GO:0043226//organelle;GO:0030141//secretory granule;GO:0016020//membrane;GO:0001669//acrosomal vesicle;GO:0016023//cytoplasmic, membrane-bounded vesicle;GO:0044424//intracellular part;GO:0098588//bounding membrane of organelle;GO:0031090//organelle membrane;GO:0030659//cytoplasmic vesicle membrane;GO:0005737//cytoplasm;GO:0031224//intrinsic component of membrane;GO:0043229//i…	-	GO:0019953//sexual reproduction;GO:0022414//reproductive process;GO:0016192//vesicle-mediated transport;GO:0044703//multi-organism reproductive process;GO:0044702//single organism reproductive process;GO:0051179//localization;GO:0006810//transport;GO:0051704//multi-organism process;GO:0000003//reproduction;GO:0044699//single-organism process;GO:0009566//fertilization;GO:0007340//acrosome reaction…
646	gene3653	0	32.6667	0.001	0.301667	7.73614	0.000956534	0.0302166	up	LOC105608437	-	-	-	-	-	-	-	-
647	gene3697	4.66667	56.3333	0.0516667	0.618333	3.36218	0.000699913	0.0253866	up	LOC101109597	PREDICTED: serine protease 52-like isoform X1 [Ovis aries]	-	-	-	-	GO:0016020//membrane;GO:0031224//intrinsic component of membrane;GO:0044425//membrane part	GO:0016787//hydrolase activity;GO:0070011//peptidase activity, acting on L-amino acid peptides;GO:0003824//catalytic activity;GO:0008233//peptidase activity	GO:0044238//primary metabolic process;GO:0043170//macromolecule metabolic process;GO:0019538//protein metabolic process;GO:0071704//organic substance metabolic process;GO:0008152//metabolic process
648	gene3718	0	76.3333	0.001	1.205	8.95438	0.000262694	0.0148439	up	LOC101111693	PREDICTED: disintegrin and metalloproteinase domain-containing protein 20-like [Ovis aries]	-	-	-	-	GO:0031224//intrinsic component of membrane;GO:0044425//membrane part;GO:0016020//membrane	GO:0043167//ion binding;GO:0046872//metal ion binding;GO:0005488//binding;GO:0003824//catalytic activity;GO:0016787//hydrolase activity;GO:0008233//peptidase activity;GO:0043169//cation binding;GO:0070011//peptidase activity, acting on L-amino acid peptides;GO:0046914//transition metal ion binding	GO:0044238//primary metabolic process;GO:0019538//protein metabolic process;GO:0008152//metabolic process;GO:0071704//organic substance metabolic process;GO:0043170//macromolecule metabolic process
649	gene378	2.33333	71.5	0.03	0.95	4.60707	0.000948272	0.0301846	up	TEX38	PREDICTED: testis-expressed sequence 38 protein isoform X1 [Ovis aries]	-	-	-	-	GO:0031224//intrinsic component of membrane;GO:0044425//membrane part;GO:0016020//membrane	-	GO:0000423//macromitophagy;GO:1903008//organelle disassembly;GO:0044763//single-organism cellular process;GO:0016236//macroautophagy;GO:0016043//cellular component organization;GO:1902589//single-organism organelle organization;GO:0007005//mitochondrion organization;GO:0006996//organelle organization;GO:0000422//mitophagy;GO:0044699//single-organism process;GO:0022411//cellular component disassem…
650	gene381	364.167	2450	8.42333	57.0917	2.77067	0.000569981	0.0227819	up	LOC101105114	PREDICTED: cytochrome P450 4B1 [Ovis aries]	-	-	-	-	GO:0031224//intrinsic component of membrane;GO:0044425//membrane part;GO:0016020//membrane	GO:0046906//tetrapyrrole binding;GO:0005488//binding;GO:0003824//catalytic activity;GO:0046914//transition metal ion binding;GO:0043167//ion binding;GO:0097159//organic cyclic compound binding;GO:0043169//cation binding;GO:0046872//metal ion binding;GO:0016491//oxidoreductase activity;GO:1901363//heterocyclic compound binding	GO:0044710//single-organism metabolic process;GO:0008152//metabolic process;GO:0044699//single-organism process
651	gene3812	397.5	145.167	1.57333	0.578333	-1.35863	0.000691017	0.025301	down	MAP3K2	PREDICTED: LOW QUALITY PROTEIN: mitogen-activated protein kinase kinase kinase 2 [Ovis aries musimon]	Organismal Systems;Cellular Processes;Environmental Information Processing	Cellular commiunity;Signal transduction;Endocrine system	ko04010//MAPK signaling pathway;ko04540//Gap junction;ko04912//GnRH signaling pathway	K04420	-	-	-
652	gene3842	1127.67	319.833	7.62333	2.205	-1.64152	2.8702e-06	0.00098752	down	COL5A2	PREDICTED: collagen alpha-2(V) chain [Ovis aries]	Organismal Systems;Cellular Processes;Environmental Information Processing	Cellular commiunity;Immune system;Signal transduction;Digestive system;Signaling molecules and interaction	ko04151//PI3K-Akt signaling pathway;ko04510//Focal adhesion;ko04611//Platelet activation;ko04974//Protein digestion and absorption;ko04512//ECM-receptor interaction	K06236	-	-	-
653	gene3843	14133.8	2977.67	113.035	24.175	-2.02948	6.93072e-05	0.00764398	down	COL3A1	PREDICTED: collagen alpha-1(III) chain [Ovis aries]	Organismal Systems;Cellular Processes;Environmental Information Processing	Cellular commiunity;Immune system;Signal transduction;Digestive system;Signaling molecules and interaction	ko04151//PI3K-Akt signaling pathway;ko04510//Focal adhesion;ko04611//Platelet activation;ko04974//Protein digestion and absorption;ko04512//ECM-receptor interaction	K06236	-	-	GO:0048731//system development;GO:0044699//single-organism process;GO:0009987//cellular process;GO:0050789//regulation of biological process;GO:0050896//response to stimulus;GO:0048856//anatomical structure development;GO:0044767//single-organism developmental process;GO:0044763//single-organism cellular process;GO:0007275//multicellular organism development;GO:0032501//multicellular organismal p…
654	gene3974	1065	403	7.21833	2.84333	-1.3284	1.40932e-06	0.000621312	down	ITGA6	PREDICTED: integrin alpha-6 isoform X1 [Ovis aries]	Organismal Systems;Cellular Processes;Environmental Information Processing	Cellular commiunity;Immune system;Cell motility;Signal transduction;Signaling molecules and interaction	ko04151//PI3K-Akt signaling pathway;ko04810//Regulation of actin cytoskeleton;ko04510//Focal adhesion;ko04514//Cell adhesion molecules (CAMs);ko04640//Hematopoietic cell lineage;ko04512//ECM-receptor interaction	K06485	GO:0005886//plasma membrane;GO:0070161//anchoring junction;GO:0031224//intrinsic component of membrane;GO:0031012//extracellular matrix;GO:0016020//membrane;GO:0005576//extracellular region;GO:0016323//basolateral plasma membrane;GO:0005887//integral component of plasma membrane;GO:0005912//adherens junction;GO:0044459//plasma membrane part;GO:0031226//intrinsic component of plasma membrane;GO:00…	-	GO:0006915//apoptotic process;GO:0022610//biological adhesion;GO:0010467//gene expression;GO:0007155//cell adhesion;GO:0032502//developmental process;GO:0031589//cell-substrate adhesion;GO:0065007//biological regulation;GO:0009888//tissue development;GO:0044085//cellular component biogenesis;GO:0030030//cell projection organization;GO:0043170//macromolecule metabolic process;GO:0034641//cellular …
655	gene3992	0.166667	22	0.0183333	1.92	5.96032	0.000947398	0.0301846	up	ERICH2	PREDICTED: glutamate-rich protein 2 isoform X3 [Ovis aries musimon]	-	-	-	-	-	-	-
656	gene403	12.5	244	0.11	2.24667	4.01727	0.000469134	0.0205502	up	SPATA6	PREDICTED: spermatogenesis-associated protein 6 isoform X1 [Ovis aries]	-	-	-	-	GO:0044464//cell part;GO:0031514//motile cilium;GO:0042995//cell projection;GO:0043226//organelle;GO:0036126//sperm flagellum;GO:0005929//cilium;GO:0005623//cell;GO:0097223//sperm part	GO:0017022//myosin binding;GO:0005488//binding;GO:0008092//cytoskeletal protein binding;GO:0005515//protein binding	GO:0044763//single-organism cellular process;GO:0044782//cilium organization;GO:0071840//cellular component organization or biogenesis;GO:0009653//anatomical structure morphogenesis;GO:0044085//cellular component biogenesis;GO:0030030//cell projection organization;GO:0006996//organelle organization;GO:0044707//single-multicellular organism process;GO:0051704//multi-organism process;GO:0032502//de…
657	gene4037	179.667	62.5	1.64333	0.578333	-1.41375	0.000153046	0.0113229	down	COBLL1	PREDICTED: cordon-bleu protein-like 1 [Pantholops hodgsonii]	-	-	-	-	-	-	-
658	gene4049	138.5	53.1667	2.48833	0.988333	-1.27223	0.00115037	0.0338123	down	FAP	PREDICTED: prolyl endopeptidase FAP isoform X1 [Ovis aries]	-	-	-	-	GO:0031252//cell leading edge;GO:0042995//cell projection;GO:0005576//extracellular region;GO:0031224//intrinsic component of membrane;GO:0044421//extracellular region part;GO:0098590//plasma membrane region;GO:0031253//cell projection membrane;GO:0005912//adherens junction;GO:0005623//cell;GO:0030055//cell-substrate junction;GO:0071944//cell periphery;GO:0005886//plasma membrane;GO:0044459//plas…	GO:0016787//hydrolase activity;GO:0005515//protein binding;GO:0046983//protein dimerization activity;GO:0003824//catalytic activity;GO:0070011//peptidase activity, acting on L-amino acid peptides;GO:0004177//aminopeptidase activity;GO:0008233//peptidase activity;GO:0005488//binding;GO:0019899//enzyme binding;GO:0004175//endopeptidase activity;GO:0008238//exopeptidase activity;GO:0005102//receptor…	GO:0008152//metabolic process;GO:0043065//positive regulation of apoptotic process;GO:0007050//cell cycle arrest;GO:0043067//regulation of programmed cell death;GO:0044699//single-organism process;GO:0010631//epithelial cell migration;GO:0010715//regulation of extracellular matrix disassembly;GO:0006508//proteolysis;GO:0044763//single-organism cellular process;GO:0016477//cell migration;GO:003250…
659	gene4136	2.33333	184.667	0.0166667	1.24	6.00523	0.000137902	0.0106614	up	KIF5C	PREDICTED: kinesin heavy chain isoform 5C isoform X2 [Ovis aries musimon]	Organismal Systems;Cellular Processes	Nervous system;Transport and catabolism	ko04144//Endocytosis;ko04728//Dopaminergic synapse	K10396	-	-	-
660	gene4235	0	18.8333	0.001	0.256667	6.95666	0.00147821	0.0391589	up	CFAP221	PREDICTED: cilia- and flagella-associated protein 221 isoform X2 [Ovis aries]	-	-	-	-	GO:0042995//cell projection;GO:0005623//cell;GO:0044464//cell part	GO:0005488//binding;GO:0005515//protein binding	GO:0032990//cell part morphogenesis;GO:0048869//cellular developmental process;GO:0000902//cell morphogenesis;GO:0044767//single-organism developmental process;GO:0048856//anatomical structure development;GO:0044763//single-organism cellular process;GO:0071840//cellular component organization or biogenesis;GO:0009653//anatomical structure morphogenesis;GO:0044699//single-organism process;GO:00329…
661	gene4276	7.5	104.833	0.126667	1.81333	3.58509	0.000561502	0.0226455	up	STAT4	PREDICTED: signal transducer and activator of transcription 4 isoform X1 [Ovis aries]	Environmental Information Processing	Signal transduction	ko04630//Jak-STAT signaling pathway	K11222	GO:0005622//intracellular;GO:0044446//intracellular organelle part;GO:0005623//cell;GO:0031981//nuclear lumen;GO:0031974//membrane-enclosed lumen;GO:0043233//organelle lumen;GO:0070013//intracellular organelle lumen;GO:0005634//nucleus;GO:0043231//intracellular membrane-bounded organelle;GO:0044428//nuclear part;GO:0043229//intracellular organelle;GO:0044464//cell part;GO:0043227//membrane-bounde…	GO:0005488//binding;GO:0003677//DNA binding;GO:1901363//heterocyclic compound binding;GO:0043565//sequence-specific DNA binding;GO:0000975//regulatory region DNA binding;GO:0003676//nucleic acid binding;GO:0097159//organic cyclic compound binding;GO:0044212//transcription regulatory region DNA binding;GO:0001067//regulatory region nucleic acid binding;GO:1990837//sequence-specific double-stranded…	GO:0051716//cellular response to stimulus;GO:0009059//macromolecule biosynthetic process;GO:0008152//metabolic process;GO:0019438//aromatic compound biosynthetic process;GO:0044237//cellular metabolic process;GO:0009987//cellular process;GO:0097659//nucleic acid-templated transcription;GO:0006366//transcription from RNA polymerase II promoter;GO:0016070//RNA metabolic process;GO:0044249//cellular…
662	gene4279	197.833	52.3333	4.23333	1.19667	-1.81224	0.000552694	0.0223711	down	NABP1	PREDICTED: SOSS complex subunit B2 isoform X1 [Ovis aries]	-	-	-	-	-	-	-
663	gene4305	223	98.1667	2.06833	0.928333	-1.04554	0.001089	0.0326597	down	PLCL1	PREDICTED: inactive phospholipase C-like protein 1 isoform X1 [Ovis aries]	Organismal Systems	Nervous system	ko04727//GABAergic synapse	K15375	GO:0016020//membrane;GO:0044464//cell part;GO:0005623//cell	GO:0003824//catalytic activity;GO:0005488//binding;GO:0005515//protein binding;GO:0043167//ion binding;GO:0016787//hydrolase activity;GO:0043168//anion binding;GO:0005102//receptor binding;GO:0042578//phosphoric ester hydrolase activity;GO:0016788//hydrolase activity, acting on ester bonds	GO:0001932//regulation of protein phosphorylation;GO:0042325//regulation of phosphorylation;GO:0023052//signaling;GO:0065009//regulation of molecular function;GO:0044763//single-organism cellular process;GO:0050896//response to stimulus;GO:0065007//biological regulation;GO:0032268//regulation of cellular protein metabolic process;GO:0023051//regulation of signaling;GO:0060255//regulation of macro…
664	gene4463	0.333333	554.5	0.075	120.727	9.94871	2.47032e-05	0.00418138	up	TNP1	PREDICTED: spermatid nuclear transition protein 1 isoform X1 [Ovis aries musimon]	-	-	-	-	-	-	-
665	gene4478	0.833333	46.3333	0.0216667	1.48667	5.33613	0.00187948	0.045057	up	CATIP	PREDICTED: ciliogenesis-associated TTC17-interacting protein isoform X1 [Ovis aries]	-	-	-	-	GO:0044464//cell part;GO:0016020//membrane;GO:0043226//organelle;GO:0043229//intracellular organelle;GO:0043228//non-membrane-bounded organelle;GO:0005856//cytoskeleton;GO:0005623//cell;GO:0005622//intracellular;GO:0044424//intracellular part;GO:0043232//intracellular non-membrane-bounded organelle	-	GO:0016043//cellular component organization;GO:0008154//actin polymerization or depolymerization;GO:0009987//cellular process;GO:0030030//cell projection organization;GO:0030036//actin cytoskeleton organization;GO:0071840//cellular component organization or biogenesis;GO:0006996//organelle organization;GO:0044763//single-organism cellular process;GO:0044699//single-organism process;GO:0030029//ac…
666	gene4499	0	36.5	0.001	0.28	7.89508	0.00077954	0.027257	up	CFAP65	PREDICTED: coiled-coil domain-containing protein 108 isoform X4 [Ovis aries musimon]	-	-	-	-	-	-	-
667	gene4512	21607	58238	802.882	2231.76	1.58441	4.95072e-09	9.21784e-06	up	TUBA4A	PREDICTED: tubulin alpha-4A chain isoform X1 [Propithecus coquereli]	Cellular Processes	Cellular commiunity;Transport and catabolism	ko04145//Phagosome;ko04540//Gap junction	K07374	GO:0044464//cell part;GO:0044421//extracellular region part;GO:0005856//cytoskeleton;GO:0043226//organelle;GO:0005622//intracellular;GO:0044424//intracellular part;GO:0031982//vesicle;GO:0043229//intracellular organelle;GO:0005576//extracellular region;GO:0043227//membrane-bounded organelle;GO:0015630//microtubule cytoskeleton;GO:0043230//extracellular organelle;GO:0043232//intracellular non-memb…	GO:0005515//protein binding;GO:0097367//carbohydrate derivative binding;GO:0001883//purine nucleoside binding;GO:0005488//binding;GO:0003824//catalytic activity;GO:0016818//hydrolase activity, acting on acid anhydrides, in phosphorus-containing anhydrides;GO:0036094//small molecule binding;GO:0097159//organic cyclic compound binding;GO:0016817//hydrolase activity, acting on acid anhydrides;GO:001…	GO:0044699//single-organism process;GO:0044763//single-organism cellular process;GO:0009987//cellular process
668	gene4513	1465.73	3287.49	46.2917	104.418	1.29193	1.70402e-05	0.00309535	up	LOC101116286	tubulin alpha-1D chain [Bos taurus]	Cellular Processes	Cellular commiunity;Transport and catabolism	ko04145//Phagosome;ko04540//Gap junction	K07374	GO:0043230//extracellular organelle;GO:0005768//endosome;GO:1903561//extracellular vesicle;GO:0043232//intracellular non-membrane-bounded organelle;GO:0031982//vesicle;GO:0005622//intracellular;GO:0012505//endomembrane system;GO:0043231//intracellular membrane-bounded organelle;GO:0044421//extracellular region part;GO:0043227//membrane-bounded organelle;GO:0005576//extracellular region;GO:0043228…	GO:0005488//binding;GO:0016818//hydrolase activity, acting on acid anhydrides, in phosphorus-containing anhydrides;GO:0016462//pyrophosphatase activity;GO:0097159//organic cyclic compound binding;GO:1901363//heterocyclic compound binding;GO:0017111//nucleoside-triphosphatase activity;GO:0005515//protein binding;GO:0001883//purine nucleoside binding;GO:0001882//nucleoside binding;GO:0016787//hydro…	GO:0009987//cellular process;GO:0044763//single-organism cellular process;GO:0044699//single-organism process
669	gene4582	0	23	0.001	0.16	7.23448	0.00172101	0.0425068	up	SPHKAP	PREDICTED: A-kinase anchor protein SPHKAP isoform X2 [Ovis aries]	-	-	-	-	GO:0031982//vesicle;GO:0005576//extracellular region;GO:0043226//organelle;GO:0044421//extracellular region part;GO:0043230//extracellular organelle;GO:1903561//extracellular vesicle;GO:0043227//membrane-bounded organelle	-	-
670	gene4602	0	323.5	0.001	12.8733	11.0346	2.94193e-05	0.00462898	up	SPATA3	PREDICTED: spermatogenesis-associated protein 3 isoform X5 [Ovis aries]	-	-	-	-	-	-	-
671	gene4614	0	30	0.001	1.16167	7.61424	0.0010918	0.0326997	up	C2H2orf57	Chromosome 2 open reading frame 57 [Homo sapiens]	-	-	-	-	-	-	-
672	gene4650	325.333	123.333	9.17167	3.695	-1.18328	0.000719143	0.025842	down	FNDC5	PREDICTED: fibronectin type III domain-containing protein 5 isoform X4 [Ovis aries musimon]	-	-	-	-	GO:0005622//intracellular;GO:0043231//intracellular membrane-bounded organelle;GO:0044425//membrane part;GO:0044424//intracellular part;GO:0044464//cell part;GO:0043227//membrane-bounded organelle;GO:0043229//intracellular organelle;GO:0031224//intrinsic component of membrane;GO:0005623//cell;GO:0043226//organelle;GO:0016020//membrane	-	GO:0014823//response to activity;GO:0065007//biological regulation;GO:0045600//positive regulation of fat cell differentiation;GO:0048518//positive regulation of biological process;GO:0050896//response to stimulus;GO:0048522//positive regulation of cellular process;GO:0050789//regulation of biological process;GO:0045597//positive regulation of cell differentiation;GO:0051094//positive regulation …
673	gene4663	6.83333	178.667	0.195	5.425	4.44709	0.000273388	0.0151296	up	FAM229A	PREDICTED: protein FAM229A [Ovis aries]	-	-	-	-	-	-	-
674	gene4664	451.333	148.167	14.0283	4.835	-1.50298	5.69116e-05	0.00673575	down	MARCKSL1	PREDICTED: MARCKS-related protein isoform X2 [Ovis aries musimon]	Organismal Systems	Immune system	ko04666//Fc gamma R-mediated phagocytosis	K13536	GO:0043230//extracellular organelle;GO:0016020//membrane;GO:0044424//intracellular part;GO:0031982//vesicle;GO:0044421//extracellular region part;GO:0043227//membrane-bounded organelle;GO:1903561//extracellular vesicle;GO:0043226//organelle;GO:0044464//cell part;GO:0005622//intracellular;GO:0005576//extracellular region;GO:0005623//cell	GO:0005515//protein binding;GO:0008092//cytoskeletal protein binding;GO:0005488//binding	GO:0008283//cell proliferation;GO:0044699//single-organism process
675	gene4747	1.66667	64.8333	0.0966667	3.92167	4.97797	0.000792659	0.0275773	up	CD164L2	PREDICTED: CD164 sialomucin-like 2 protein isoform X5 [Ovis aries musimon]	-	-	-	-	GO:0044425//membrane part;GO:0031224//intrinsic component of membrane;GO:0016020//membrane	-	-
676	gene4793	723.5	316	36.5683	16.6533	-1.17301	0.000115371	0.0095472	down	STMN1	stathmin isoform a [Homo sapiens]	Environmental Information Processing	Signal transduction	ko04010//MAPK signaling pathway	K04381	-	-	-
677	gene4807	3325.83	1337.17	33.725	13.965	-1.18898	1.6613e-05	0.00308891	down	CLIC4	PREDICTED: chloride intracellular channel protein 4 [Ovis aries]	-	-	-	-	-	-	-
678	gene481	0	197	0.001	2.63333	10.32	4.62656e-05	0.0064103	up	MROH7	PREDICTED: maestro heat-like repeat-containing protein family member 7 isoform X1 [Ovis aries]	-	-	-	-	-	-	-
679	gene4847	0	34.1667	0.001	1.45333	7.80043	0.000875813	0.0290708	up	C2H1orf234	hCG1812029 [Homo sapiens]	-	-	-	-	-	-	-
680	gene4861	0.666667	113.667	0.0316667	5.48333	6.83104	0.000714911	0.0257633	up	LOC101103876	RIKEN cDNA 1700013G24 [Mus musculus]	-	-	-	-	-	-	-
681	gene4874	3.83333	506.667	0.04	5.59	6.74708	8.20356e-07	0.000416573	up	KIF17	PREDICTED: kinesin-like protein KIF17 isoform X4 [Ovis aries musimon]	-	-	-	-	-	-	-
682	gene4937	1.33333	60.1667	0.01	0.45	5.13523	0.000334914	0.0166336	up	SPATA21	PREDICTED: spermatogenesis-associated protein 21-like isoform X2 [Ovis aries musimon]	-	-	-	-	-	-	-
683	gene4965	0.833333	58.1883	0.0366667	2.64	5.67497	0.00106769	0.0322371	up	FAM166A	PREDICTED: protein FAM166A isoform X1 [Ovis aries]	-	-	-	-	-	-	-
684	gene4993	0	25.1667	0.001	4.44333	7.37024	0.000910561	0.0296035	up	TMEM210	PREDICTED: transmembrane protein 210 isoform X2 [Ovis aries musimon]	-	-	-	-	-	-	-
685	gene5002	1624.74	2990.6	104.198	199.268	1.03458	5.39902e-05	0.00673575	up	LOC101109608	PREDICTED: tubulin beta-4B chain isoform X5 [Odobenus rosmarus divergens]	-	-	-	-	GO:0043227//membrane-bounded organelle;GO:0005576//extracellular region;GO:0044424//intracellular part;GO:0005623//cell;GO:0043228//non-membrane-bounded organelle;GO:0044444//cytoplasmic part;GO:0031982//vesicle;GO:1903561//extracellular vesicle;GO:0005622//intracellular;GO:0044421//extracellular region part;GO:0043231//intracellular membrane-bounded organelle;GO:0043226//organelle;GO:0015630//mi…	GO:0032550//purine ribonucleoside binding;GO:0097367//carbohydrate derivative binding;GO:0017111//nucleoside-triphosphatase activity;GO:0003676//nucleic acid binding;GO:0042287//MHC protein binding;GO:0003824//catalytic activity;GO:0005102//receptor binding;GO:1901363//heterocyclic compound binding;GO:0005515//protein binding;GO:0016787//hydrolase activity;GO:0097159//organic cyclic compound bind…	GO:0009987//cellular process;GO:0044763//single-organism cellular process;GO:0044699//single-organism process;GO:0001906//cell killing;GO:0001909//leukocyte mediated cytotoxicity
686	gene5029	201.5	420	7.5	16.3117	1.13345	7.05094e-07	0.00036637	up	AGPAT2	PREDICTED: 1-acyl-sn-glycerol-3-phosphate acyltransferase beta isoform X2 [Ovis aries musimon]	Organismal Systems;Metabolism	Digestive system;Lipid metabolism	ko00564//Glycerophospholipid metabolism;ko00561//Glycerolipid metabolism;ko04975//Fat digestion and absorption	K13509	-	-	-
687	gene5042	0.333333	28.6667	0.00666667	0.526667	5.73418	0.00114583	0.0337747	up	CCDC187	PREDICTED: serine/arginine repetitive matrix protein 2-like, partial [Leptonychotes weddellii]	-	-	-	-	-	-	-
688	gene5054	0	38.8333	0.001	1.25167	7.9839	0.000707786	0.025561	up	GLT6D1	PREDICTED: glycosyltransferase 6 domain-containing protein 1 [Ovis aries]	-	-	-	-	GO:0044425//membrane part;GO:0031224//intrinsic component of membrane;GO:0016020//membrane	GO:0016740//transferase activity;GO:0003824//catalytic activity;GO:0016757//transferase activity, transferring glycosyl groups	-
689	gene5066	11.1667	191.167	0.343333	9.72667	3.86751	0.000505298	0.0213411	up	C3H9orf9	RSB-66 [Rattus norvegicus]	-	-	-	-	GO:0005622//intracellular;GO:0044424//intracellular part;GO:0044464//cell part;GO:0005737//cytoplasm;GO:0005623//cell	GO:0005488//binding;GO:0005515//protein binding	-
690	gene5109	110.333	25.8333	10.695	2.49333	-1.93921	0.000248225	0.0145673	down	PTGES	PREDICTED: prostaglandin E synthase [Ovis aries]	Metabolism	Lipid metabolism	ko00590//Arachidonic acid metabolism	K15729	GO:0044425//membrane part;GO:0043229//intracellular organelle;GO:0044446//intracellular organelle part;GO:0043226//organelle;GO:0044422//organelle part;GO:0043227//membrane-bounded organelle;GO:0005634//nucleus;GO:0043231//intracellular membrane-bounded organelle;GO:0044428//nuclear part;GO:0044424//intracellular part;GO:0005623//cell;GO:0005635//nuclear envelope;GO:0031967//organelle envelope;GO…	GO:0003824//catalytic activity;GO:0005488//binding;GO:0043168//anion binding;GO:0016853//isomerase activity;GO:0016860//intramolecular oxidoreductase activity;GO:0043167//ion binding	GO:0044237//cellular metabolic process;GO:0009987//cellular process;GO:0044281//small molecule metabolic process;GO:0006631//fatty acid metabolic process;GO:0050896//response to stimulus;GO:0006693//prostaglandin metabolic process;GO:0044710//single-organism metabolic process;GO:0019752//carboxylic acid metabolic process;GO:0070555//response to interleukin-1;GO:0006690//icosanoid metabolic proces…
691	gene5114	39.8333	467.333	1.80833	22.3083	3.30328	0.000514999	0.0215884	up	C3H9orf50	C9ORF50s [Homo sapiens]	-	-	-	-	-	-	-
692	gene5270	181.5	57.3333	2.35333	0.771667	-1.61348	4.84619e-05	0.00644514	down	LHX6	PREDICTED: LOW QUALITY PROTEIN: LIM/homeobox protein Lhx6 isoform X1 [Ovis aries]	-	-	-	-	GO:0044464//cell part;GO:0043226//organelle;GO:0005622//intracellular;GO:0005623//cell;GO:0044424//intracellular part;GO:0043229//intracellular organelle;GO:0043231//intracellular membrane-bounded organelle;GO:0043227//membrane-bounded organelle	GO:0043169//cation binding;GO:0043167//ion binding;GO:0046914//transition metal ion binding;GO:0046872//metal ion binding;GO:0097159//organic cyclic compound binding;GO:0005488//binding;GO:0001071//nucleic acid binding transcription factor activity;GO:0003676//nucleic acid binding;GO:0003677//DNA binding;GO:1901363//heterocyclic compound binding	GO:1901576//organic substance biosynthetic process;GO:0022029//telencephalon cell migration;GO:0007420//brain development;GO:0021843//substrate-independent telencephalic tangential interneuron migration;GO:0008152//metabolic process;GO:0044707//single-multicellular organism process;GO:0021872//forebrain generation of neurons;GO:0048856//anatomical structure development;GO:0071704//organic substan…
693	gene5280	0	31.6667	0.001	0.895	7.69538	0.000565874	0.0227398	up	LOC101114761	PREDICTED: N-acetyllactosaminide alpha-1,3-galactosyltransferase-like [Ovis aries]	-	-	-	-	-	-	-
694	gene5302	220.833	72	1.22167	0.416667	-1.51196	8.65927e-06	0.00210298	down	MBOAT2	PREDICTED: lysophospholipid acyltransferase 2 isoform X3 [Ovis aries musimon]	Metabolism	Lipid metabolism	ko00564//Glycerophospholipid metabolism;ko00561//Glycerolipid metabolism	K13517	GO:0031224//intrinsic component of membrane;GO:0016020//membrane;GO:0044425//membrane part	-	-
695	gene5329	1615.17	513.833	8.87833	2.92167	-1.45932	5.06267e-07	0.000282788	down	ROCK2	PREDICTED: rho-associated protein kinase 2 isoform X2 [Ovis aries musimon]	Organismal Systems;Cellular Processes;Environmental Information Processing	Cellular commiunity;Immune system;Signal transduction;Cell motility;Development;Circulatory system;Endocrine system	ko04810//Regulation of actin cytoskeleton;ko04510//Focal adhesion;ko04024//cAMP signaling pathway;ko04022//cGMP - PKG signaling pathway;ko04062//Chemokine signaling pathway;ko04921//Oxytocin signaling pathway;ko04270//Vascular smooth muscle contraction;ko04310//Wnt signaling pathway;ko04611//Platelet activation;ko04360//Axon guidance;ko04071//Sphingolipid signaling pathway;ko04670//Leukocyte tran…	K17388	GO:0005856//cytoskeleton;GO:0005815//microtubule organizing center;GO:0044424//intracellular part;GO:0044422//organelle part;GO:0043228//non-membrane-bounded organelle;GO:0044464//cell part;GO:0005623//cell;GO:0015630//microtubule cytoskeleton;GO:0044446//intracellular organelle part;GO:0043226//organelle;GO:0005622//intracellular;GO:0043229//intracellular organelle;GO:0044430//cytoskeletal part;…	GO:0003824//catalytic activity;GO:0005515//protein binding;GO:1901363//heterocyclic compound binding;GO:0043169//cation binding;GO:0004672//protein kinase activity;GO:0016740//transferase activity;GO:0097159//organic cyclic compound binding;GO:0016772//transferase activity, transferring phosphorus-containing groups;GO:0003723//RNA binding;GO:0001882//nucleoside binding;GO:0019899//enzyme binding;…	GO:0048519//negative regulation of biological process;GO:0065009//regulation of molecular function;GO:0016043//cellular component organization;GO:0009987//cellular process;GO:0010594//regulation of endothelial cell migration;GO:0043170//macromolecule metabolic process;GO:0001944//vasculature development;GO:0070830//bicellular tight junction assembly;GO:0032515//negative regulation of phosphoprote…
696	gene5362	0	105	0.001	1.88333	9.41817	8.10218e-05	0.00815437	up	LOC101102216	PREDICTED: cytosolic 5'-nucleotidase 1B-like isoform X1 [Ovis aries]	Metabolism	Metabolism of cofactors and vitamins;Nucleotide metabolism	ko00230//Purine metabolism;ko00240//Pyrimidine metabolism;ko00760//Nicotinate and nicotinamide metabolism	K01081	GO:0005622//intracellular;GO:0044464//cell part;GO:0005737//cytoplasm;GO:0044444//cytoplasmic part;GO:0044424//intracellular part;GO:0005623//cell	GO:0042578//phosphoric ester hydrolase activity;GO:0043167//ion binding;GO:0016791//phosphatase activity;GO:0043169//cation binding;GO:0008252//nucleotidase activity;GO:0016788//hydrolase activity, acting on ester bonds;GO:0046872//metal ion binding;GO:0005488//binding;GO:0016787//hydrolase activity;GO:0003824//catalytic activity	GO:0055086//nucleobase-containing small molecule metabolic process;GO:0006807//nitrogen compound metabolic process;GO:1901360//organic cyclic compound metabolic process;GO:0006139//nucleobase-containing compound metabolic process;GO:0044237//cellular metabolic process;GO:0044281//small molecule metabolic process;GO:0046483//heterocycle metabolic process;GO:0044238//primary metabolic process;GO:00…
697	gene5445	1.5	222.333	0.02	2.96167	6.85756	0.000210104	0.0132609	up	PRR30	PREDICTED: proline-rich protein 30 [Ovis aries]	-	-	-	-	-	-	-
698	gene5614	375.667	163.333	6.78333	3.07667	-1.07599	1.14659e-05	0.00253646	down	TCF7L1	PREDICTED: LOW QUALITY PROTEIN: transcription factor 7-like 1 isoform X1 [Ovis aries]	Cellular Processes;Organismal Systems;Environmental Information Processing	Cellular commiunity;Signal transduction;Endocrine system	ko04390//Hippo signaling pathway;ko04310//Wnt signaling pathway;ko04916//Melanogenesis;ko04520//Adherens junction	K04490	-	-	-
699	gene5659	0	47.1667	0.001	3.72167	8.26275	0.000517656	0.0216592	up	TEX37	PREDICTED: testis-expressed sequence 37 protein isoform X1 [Ovis aries]	-	-	-	-	-	-	-
700	gene5710	143	40.6667	2.71333	0.796667	-1.77257	0.00118724	0.0342279	down	CCDC138	PREDICTED: coiled-coil domain-containing protein 138 isoform X1 [Ovis aries]	-	-	-	-	-	-	-
701	gene5741	264.833	120.5	3.38167	1.575	-1.04677	0.000445506	0.0200684	down	CCDC85A	PREDICTED: LOW QUALITY PROTEIN: coiled-coil domain-containing protein 85A isoform X2 [Ovis aries]	-	-	-	-	-	-	-
702	gene5815	0	50.6667	0.001	1.12667	8.36549	0.000463285	0.0204851	up	TMEM247	PREDICTED: transmembrane protein 247 isoform X1 [Ovis aries]	-	-	-	-	-	-	-
703	gene5923	476.167	212.333	3.185	1.46333	-1.02399	0.000189288	0.0126247	down	LTBP1	PREDICTED: latent-transforming growth factor beta-binding protein 1 isoform X8 [Ovis aries musimon]	Environmental Information Processing	Signal transduction	ko04350//TGF-beta signaling pathway	K19559	GO:0031012//extracellular matrix;GO:0032991//macromolecular complex;GO:0005576//extracellular region;GO:0044421//extracellular region part	GO:0043169//cation binding;GO:0005488//binding;GO:0005515//protein binding;GO:0046872//metal ion binding;GO:0019838//growth factor binding;GO:0043167//ion binding	GO:0044699//single-organism process;GO:0072358//cardiovascular system development;GO:0003205//cardiac chamber development;GO:0001944//vasculature development;GO:0048856//anatomical structure development;GO:0044707//single-multicellular organism process;GO:0032502//developmental process;GO:0007275//multicellular organism development;GO:0044767//single-organism developmental process;GO:0060840//art…
704	gene5955	137.5	316.667	3.065	7.26167	1.20548	0.00031889	0.016417	up	PAIP2B	PREDICTED: polyadenylate-binding protein-interacting protein 2B [Ovis aries]	-	-	-	-	-	-	GO:0044249//cellular biosynthetic process;GO:0009987//cellular process;GO:0043604//amide biosynthetic process;GO:1901566//organonitrogen compound biosynthetic process;GO:0006413//translational initiation;GO:0043043//peptide biosynthetic process;GO:0044237//cellular metabolic process;GO:0044267//cellular protein metabolic process;GO:0008152//metabolic process;GO:0034641//cellular nitrogen compound…
705	gene5981	11.8333	2	0.168333	0.0283333	-2.48062	0.000847573	0.0286396	down	NAT8B	PREDICTED: probable N-acetyltransferase 8B [Pantholops hodgsonii]	-	-	-	-	-	-	-
706	gene5999	5	55.6667	0.0966667	1.12667	3.21967	0.000765724	0.0269426	up	C3H2orf81	chromosome 2 open reading frame 81 ortholog [Sus scrofa]	-	-	-	-	-	-	-
707	gene6036	65.5	160.667	0.793333	2.00333	1.24523	0.00195109	0.045979	up	MFSD9	PREDICTED: major facilitator superfamily domain-containing protein 9 isoform X6 [Ovis aries]	-	-	-	-	-	-	-
708	gene6086	9.5	89.8333	0.0933333	0.91	3.03981	5.69041e-05	0.00673575	up	VWA3B	PREDICTED: LOW QUALITY PROTEIN: von Willebrand factor A domain-containing protein 3B [Ovis aries]	-	-	-	-	-	-	-
709	gene6203	4.16667	58.1667	0.03	0.443333	3.74413	0.000630416	0.023881	up	LIN7A	protein lin-7 homolog A [Homo sapiens]	-	-	-	-	-	-	-
710	gene6205	0	23	0.001	0.613333	7.23448	0.00172173	0.0425068	up	LOC105610121	-	-	-	-	-	-	-	-
711	gene6251	0	35.5	0.001	1.21333	7.85528	0.000818243	0.0283003	up	CCER1	PREDICTED: LOW QUALITY PROTEIN: coiled-coil domain-containing glutamate-rich protein 1 [Ovis aries]	-	-	-	-	-	-	-
712	gene6297	1.33333	101	0.0166667	1.24	5.89	0.00165958	0.0417567	up	GTSF1	PREDICTED: gametocyte-specific factor 1 isoform X1 [Ovis aries]	-	-	-	-	GO:0044464//cell part;GO:0044424//intracellular part;GO:0005623//cell;GO:0005622//intracellular	GO:0043167//ion binding;GO:0005488//binding;GO:0043169//cation binding	GO:0032501//multicellular organismal process;GO:0007276//gamete generation;GO:0032502//developmental process;GO:0009987//cellular process;GO:0048869//cellular developmental process;GO:0051704//multi-organism process;GO:0022414//reproductive process;GO:0019953//sexual reproduction;GO:0044703//multi-organism reproductive process;GO:0048232//male gamete generation;GO:0044702//single organism reprodu…
713	gene6298	2680.33	1073.17	27.8	11.4167	-1.21848	3.14309e-05	0.00477728	down	ITGA5	PREDICTED: integrin alpha-5 isoform X2 [Ovis aries musimon]	Organismal Systems;Cellular Processes;Environmental Information Processing	Cellular commiunity;Immune system;Cell motility;Signal transduction;Transport and catabolism;Signaling molecules and interaction	ko04151//PI3K-Akt signaling pathway;ko04810//Regulation of actin cytoskeleton;ko04510//Focal adhesion;ko04145//Phagosome;ko04640//Hematopoietic cell lineage;ko04512//ECM-receptor interaction	K06484	GO:0044425//membrane part;GO:0030054//cell junction;GO:0005887//integral component of plasma membrane;GO:0043226//organelle;GO:0005912//adherens junction;GO:0005924//cell-substrate adherens junction;GO:0071944//cell periphery;GO:0030055//cell-substrate junction;GO:0044459//plasma membrane part;GO:0016020//membrane;GO:0031252//cell leading edge;GO:0044424//intracellular part;GO:0001726//ruffle;GO:…	GO:0043167//ion binding;GO:0005515//protein binding;GO:0043169//cation binding;GO:0005488//binding;GO:0005102//receptor binding	GO:0042327//positive regulation of phosphorylation;GO:0050890//cognition;GO:0007611//learning or memory;GO:0007154//cell communication;GO:0098742//cell-cell adhesion via plasma-membrane adhesion molecules;GO:0051247//positive regulation of protein metabolic process;GO:0022610//biological adhesion;GO:0007610//behavior;GO:0023052//signaling;GO:0043066//negative regulation of apoptotic process;GO:00…
714	gene633	0	23.1667	0.001	0.586667	7.24479	0.00169247	0.0421449	up	ASB17	PREDICTED: ankyrin repeat and SOCS box protein 17 isoform X1 [Ovis aries]	-	-	-	-	-	-	GO:0044237//cellular metabolic process;GO:0050794//regulation of cellular process;GO:0009987//cellular process;GO:0019538//protein metabolic process;GO:0044260//cellular macromolecule metabolic process;GO:0023052//signaling;GO:0006464//cellular protein modification process;GO:0044700//single organism signaling;GO:0050896//response to stimulus;GO:0007154//cell communication;GO:0065007//biological …
715	gene6376	0	25	0.001	0.325	7.35702	0.000630614	0.023881	up	KRT84	PREDICTED: keratin, type II cuticular Hb4 isoform X1 [Ovis aries]	-	-	-	-	GO:0044422//organelle part;GO:0044430//cytoskeletal part;GO:0044424//intracellular part;GO:1903561//extracellular vesicle;GO:0045111//intermediate filament cytoskeleton;GO:0044421//extracellular region part;GO:0005623//cell;GO:0043230//extracellular organelle;GO:0043228//non-membrane-bounded organelle;GO:0043232//intracellular non-membrane-bounded organelle;GO:0043226//organelle;GO:0005856//cytos…	GO:0005198//structural molecule activity	GO:0008544//epidermis development;GO:0060429//epithelium development;GO:0044707//single-multicellular organism process;GO:0030154//cell differentiation;GO:0044763//single-organism cellular process;GO:0032501//multicellular organismal process;GO:0044767//single-organism developmental process;GO:0032502//developmental process;GO:0009913//epidermal cell differentiation;GO:0007275//multicellular orga…
716	gene6392	1011.83	404	23.63	9.735	-1.179	1.3329e-06	0.000621312	down	ACVRL1	PREDICTED: LOW QUALITY PROTEIN: serine/threonine-protein kinase receptor R3 isoform X1 [Ovis aries]	-	-	-	-	GO:0005886//plasma membrane;GO:0016020//membrane;GO:0031224//intrinsic component of membrane;GO:0071944//cell periphery;GO:0044464//cell part;GO:0044425//membrane part;GO:0005623//cell	GO:0004672//protein kinase activity;GO:0060089//molecular transducer activity;GO:0099600//transmembrane receptor activity;GO:0001883//purine nucleoside binding;GO:0019899//enzyme binding;GO:0005515//protein binding;GO:0016773//phosphotransferase activity, alcohol group as acceptor;GO:0097159//organic cyclic compound binding;GO:0044877//macromolecular complex binding;GO:0004675//transmembrane rece…	GO:0051239//regulation of multicellular organismal process;GO:0051674//localization of cell;GO:0048518//positive regulation of biological process;GO:0031323//regulation of cellular metabolic process;GO:0040012//regulation of locomotion;GO:0071772//response to BMP;GO:0072359//circulatory system development;GO:0031324//negative regulation of cellular metabolic process;GO:0030856//regulation of epit…
717	gene6471	0	61.5	0.001	1.30333	8.64601	0.000199557	0.0128123	up	CCDC65	PREDICTED: coiled-coil domain-containing protein 65 [Ovis aries]	-	-	-	-	-	-	-
718	gene6495	0	106.667	0.001	7.72167	9.43577	0.000173381	0.0121058	up	C3H12orf54	HSD-29 [Homo sapiens]	-	-	-	-	-	-	-
719	gene6504	3.66667	432.667	0.246667	30.435	6.52905	4.58902e-06	0.00134911	up	LOC101105997	PREDICTED: testis-specific H1 histone isoform X2 [Ovis aries musimon]	-	-	-	-	-	-	-
720	gene6572	2152.5	836.5	7.80833	3.13167	-1.28669	1.75731e-07	0.000145421	down	PTPRB	PREDICTED: receptor-type tyrosine-protein phosphatase beta isoform X1 [Ovis aries]	Cellular Processes	Cellular commiunity	ko04520//Adherens junction	K05694	GO:0044425//membrane part;GO:0043234//protein complex;GO:0032991//macromolecular complex;GO:0031224//intrinsic component of membrane;GO:0016020//membrane	GO:0003824//catalytic activity;GO:0016787//hydrolase activity;GO:0016791//phosphatase activity;GO:0042578//phosphoric ester hydrolase activity;GO:0004721//phosphoprotein phosphatase activity;GO:0016788//hydrolase activity, acting on ester bonds	GO:0043170//macromolecule metabolic process;GO:0071704//organic substance metabolic process;GO:0044267//cellular protein metabolic process;GO:0006470//protein dephosphorylation;GO:0006464//cellular protein modification process;GO:0006793//phosphorus metabolic process;GO:0044237//cellular metabolic process;GO:0008152//metabolic process;GO:0044260//cellular macromolecule metabolic process;GO:000998…
721	gene666	536.333	254.167	2.90333	1.42833	-1.00617	2.35545e-05	0.00401739	down	ADGRL2	PREDICTED: latrophilin-2 isoform X1 [Ovis aries]	-	-	-	-	GO:0016020//membrane;GO:0044425//membrane part;GO:0031224//intrinsic component of membrane	GO:0099600//transmembrane receptor activity;GO:0038023//signaling receptor activity;GO:0004888//transmembrane signaling receptor activity;GO:0004872//receptor activity;GO:0005488//binding;GO:0060089//molecular transducer activity;GO:0004871//signal transducer activity	GO:0009987//cellular process;GO:0050896//response to stimulus;GO:0007154//cell communication;GO:0007165//signal transduction;GO:0044700//single organism signaling;GO:0023052//signaling;GO:0065007//biological regulation;GO:0044763//single-organism cellular process;GO:0050794//regulation of cellular process;GO:0050789//regulation of biological process;GO:0051716//cellular response to stimulus;GO:00…
722	gene6865	202.833	66.5	2.645	0.836667	-1.4461	0.000674901	0.0248834	down	NTN4	PREDICTED: netrin-4 isoform X1 [Ovis aries]	Organismal Systems	Development	ko04360//Axon guidance	K06845	GO:0005578//proteinaceous extracellular matrix;GO:0044421//extracellular region part;GO:0005576//extracellular region;GO:0031012//extracellular matrix	GO:0043236//laminin binding;GO:0005488//binding;GO:0005515//protein binding;GO:0050840//extracellular matrix binding	GO:0048869//cellular developmental process;GO:0048856//anatomical structure development;GO:0048699//generation of neurons;GO:0032502//developmental process;GO:0044763//single-organism cellular process;GO:0009987//cellular process;GO:0032501//multicellular organismal process;GO:0044700//single organism signaling;GO:0044767//single-organism developmental process;GO:0042551//neuron maturation;GO:004…
723	gene6872	781	341.167	5.60333	2.52333	-1.13642	1.60422e-05	0.00308885	down	ELK3	PREDICTED: ETS domain-containing protein Elk-3 isoform X3 [Ovis aries musimon]	-	-	-	-	-	-	-
724	gene6873	749.257	1451.94	124.608	247.122	1.09402	9.68261e-05	0.0086997	up	LOC101119296	40S ribosomal protein S15a [Homo sapiens]	Genetic Information Processing	Translation	ko03010//Ribosome	K02957	-	-	-
725	gene6967	348	142	6.63667	2.86833	-1.18637	5.9807e-05	0.00685266	down	CRY1	PREDICTED: cryptochrome-1 isoform X1 [Ovis aries]	Organismal Systems	Environmental adaptation	ko04710//Circadian rhythm	K02295	GO:0043226//organelle;GO:0043229//intracellular organelle;GO:0043227//membrane-bounded organelle;GO:0044464//cell part;GO:0005623//cell;GO:0044424//intracellular part;GO:0043231//intracellular membrane-bounded organelle;GO:0005622//intracellular	GO:0003690//double-stranded DNA binding;GO:0003677//DNA binding;GO:0005102//receptor binding;GO:1990837//sequence-specific double-stranded DNA binding;GO:0000975//regulatory region DNA binding;GO:0043565//sequence-specific DNA binding;GO:1901363//heterocyclic compound binding;GO:0032182//ubiquitin-like protein binding;GO:0000976//transcription regulatory region sequence-specific DNA binding;GO:00…	GO:0006006//glucose metabolic process;GO:1903531//negative regulation of secretion by cell;GO:2000832//negative regulation of steroid hormone secretion;GO:0051241//negative regulation of multicellular organismal process;GO:0065007//biological regulation;GO:0000075//cell cycle checkpoint;GO:0051051//negative regulation of transport;GO:0043170//macromolecule metabolic process;GO:0044238//primary me…
726	gene7025	0	293.667	0.001	13.815	10.8961	5.64748e-06	0.00150216	up	TEX33	PREDICTED: testis-expressed sequence 33 protein [Ovis aries]	-	-	-	-	-	-	-
727	gene7032	324.667	65.8333	5.385	1.15167	-2.03362	0.00088394	0.0291726	down	C1QTNF6	PREDICTED: complement C1q tumor necrosis factor-related protein 6 [Ovis aries]	-	-	-	-	GO:0005576//extracellular region;GO:0032991//macromolecular complex;GO:0044421//extracellular region part;GO:0043234//protein complex	GO:0005515//protein binding;GO:0005488//binding	GO:0070271//protein complex biogenesis;GO:0006461//protein complex assembly;GO:0043933//macromolecular complex subunit organization;GO:0044085//cellular component biogenesis;GO:0051259//protein oligomerization;GO:0065003//macromolecular complex assembly;GO:0071822//protein complex subunit organization;GO:0009987//cellular process;GO:0051291//protein heterooligomerization;GO:0016043//cellular comp…
728	gene7132	28.525	7.85333	0.12	0.0333333	-1.80653	0.00119696	0.0344635	down	ST8SIA1	PREDICTED: alpha-N-acetylneuraminide alpha-2,8-sialyltransferase isoform X1 [Ovis aries]	Metabolism	Glycan biosynthesis and metabolism	ko00601//Glycosphingolipid biosynthesis - lacto and neolacto series;ko00603//Glycosphingolipid biosynthesis - globo series;ko00604//Glycosphingolipid biosynthesis - ganglio series	K03371	-	-	-
729	gene7164	0	124.167	0.001	6.30833	9.65446	0.000141368	0.010817	up	CAPZA3	PREDICTED: F-actin-capping protein subunit alpha-3 [Ovis aries]	Cellular Processes	Transport and catabolism	ko04144//Endocytosis	K10364	GO:0043231//intracellular membrane-bounded organelle;GO:0005623//cell;GO:0043226//organelle;GO:0043229//intracellular organelle;GO:0005856//cytoskeleton;GO:0015629//actin cytoskeleton;GO:0043227//membrane-bounded organelle;GO:0044424//intracellular part;GO:0044464//cell part;GO:0005622//intracellular;GO:0043228//non-membrane-bounded organelle;GO:0043232//intracellular non-membrane-bounded organel…	GO:0008092//cytoskeletal protein binding;GO:0005515//protein binding;GO:0005488//binding	GO:0030834//regulation of actin filament depolymerization;GO:0033043//regulation of organelle organization;GO:0044699//single-organism process;GO:0051693//actin filament capping;GO:0090066//regulation of anatomical structure size;GO:0051494//negative regulation of cytoskeleton organization;GO:0007281//germ cell development;GO:0010639//negative regulation of organelle organization;GO:0032502//deve…
730	gene7186	0.333333	5.66667	0.015	0.295	3.62938	0.00176542	0.0434386	up	PDE6H	retinal cone rhodopsin-sensitive cGMP 3',5'-cyclic phosphodiesterase subunit gamma [Bos taurus]	Metabolism	Nucleotide metabolism	ko00230//Purine metabolism	K13760	-	GO:0003824//catalytic activity;GO:0016787//hydrolase activity;GO:0097159//organic cyclic compound binding;GO:0036094//small molecule binding;GO:0004114//3',5'-cyclic-nucleotide phosphodiesterase activity;GO:0008081//phosphoric diester hydrolase activity;GO:0016788//hydrolase activity, acting on ester bonds;GO:0004112//cyclic-nucleotide phosphodiesterase activity;GO:1901363//heterocyclic compound …	GO:0007173//epidermal growth factor receptor signaling pathway;GO:0050896//response to stimulus;GO:0038127//ERBB signaling pathway;GO:0007165//signal transduction;GO:0050789//regulation of biological process;GO:0007167//enzyme linked receptor protein signaling pathway;GO:0050953//sensory perception of light stimulus;GO:0044763//single-organism cellular process;GO:0050794//regulation of cellular p…
731	gene7189	4485.33	1969	439.85	200.383	-1.07484	0.000233041	0.0141107	down	MGP	PREDICTED: matrix Gla protein [Ovis aries]	-	-	-	-	-	-	-
732	gene7205	3437	1031	56.9583	17.27	-1.55628	3.26545e-05	0.00489664	down	EMP1	PREDICTED: epithelial membrane protein 1 [Ovis aries]	-	-	-	-	GO:0044425//membrane part;GO:0031224//intrinsic component of membrane;GO:0016020//membrane	-	GO:0009987//cellular process;GO:0044763//single-organism cellular process;GO:0040007//growth;GO:0030031//cell projection assembly;GO:0044085//cellular component biogenesis;GO:0030030//cell projection organization;GO:0044699//single-organism process;GO:0016043//cellular component organization;GO:0022607//cellular component assembly;GO:0071840//cellular component organization or biogenesis
733	gene7206	0.166667	937.833	0.00666667	36.105	11.4015	3.87684e-06	0.00125078	up	GSG1	PREDICTED: germ cell-specific gene 1 protein isoform X1 [Ovis aries]	-	-	-	-	GO:0005623//cell;GO:0043227//membrane-bounded organelle;GO:0031224//intrinsic component of membrane;GO:0005622//intracellular;GO:0044424//intracellular part;GO:0043229//intracellular organelle;GO:0043226//organelle;GO:0044464//cell part;GO:0016020//membrane;GO:0044425//membrane part;GO:0043231//intracellular membrane-bounded organelle	GO:0019899//enzyme binding;GO:0005488//binding;GO:0005515//protein binding	-
734	gene7231	12.5	97.5	0.271667	2.25333	2.79191	0.000602485	0.0234927	up	BCL2L14	PREDICTED: apoptosis facilitator Bcl-2-like protein 14 isoform X1 [Ovis aries]	-	-	-	-	GO:0044424//intracellular part;GO:0044464//cell part;GO:0005737//cytoplasm;GO:0044444//cytoplasmic part;GO:0005622//intracellular;GO:0005623//cell;GO:0043226//organelle	GO:0005515//protein binding;GO:0019899//enzyme binding;GO:0005488//binding;GO:0019900//kinase binding	GO:0050794//regulation of cellular process;GO:0097190//apoptotic signaling pathway;GO:0007166//cell surface receptor signaling pathway;GO:0006915//apoptotic process;GO:0007154//cell communication;GO:0065007//biological regulation;GO:0008219//cell death;GO:0044699//single-organism process;GO:0051716//cellular response to stimulus;GO:0097191//extrinsic apoptotic signaling pathway;GO:0007165//signal…
735	gene7366	487.5	895.833	8.45667	16.2683	1.08094	0.00202427	0.0468201	up	USP5	PREDICTED: LOW QUALITY PROTEIN: ubiquitin carboxyl-terminal hydrolase 5 isoform X3 [Ovis aries]	-	-	-	-	-	GO:0003824//catalytic activity;GO:0005488//binding;GO:0016787//hydrolase activity;GO:0043167//ion binding;GO:0008234//cysteine-type peptidase activity;GO:0019783//ubiquitin-like protein-specific protease activity;GO:0046914//transition metal ion binding;GO:0008233//peptidase activity;GO:0070011//peptidase activity, acting on L-amino acid peptides;GO:0032182//ubiquitin-like protein binding;GO:0043…	GO:0070646//protein modification by small protein removal;GO:0044237//cellular metabolic process;GO:1903362//regulation of cellular protein catabolic process;GO:0071704//organic substance metabolic process;GO:0044267//cellular protein metabolic process;GO:0050794//regulation of cellular process;GO:0044260//cellular macromolecule metabolic process;GO:0050789//regulation of biological process;GO:00…
736	gene7380	3.83333	132.667	0.095	3.43833	4.8431	0.00038188	0.0181539	up	ACRBP	PREDICTED: acrosin-binding protein isoform X1 [Ovis aries]	-	-	-	-	-	-	-
737	gene7409	0.333333	186.833	0.005	2.85167	8.43165	1.585e-05	0.00308885	up	AKAP3	PREDICTED: A-kinase anchor protein 3 isoform X1 [Ovis aries]	-	-	-	-	-	-	-
738	gene7458	0	16.5	0.001	0.68	6.76647	0.00141436	0.038258	up	LOC106991091	-	-	-	-	-	-	-	-
739	gene7472	3129	7932.43	107.112	284.672	1.46204	1.04089e-08	1.66118e-05	up	TUBA8	PREDICTED: tubulin alpha-8 chain [Pantholops hodgsonii]	Cellular Processes	Cellular commiunity;Transport and catabolism	ko04145//Phagosome;ko04540//Gap junction	K07374	GO:0015630//microtubule cytoskeleton;GO:0005622//intracellular;GO:0043229//intracellular organelle;GO:0005856//cytoskeleton;GO:0043232//intracellular non-membrane-bounded organelle;GO:0043226//organelle;GO:0005623//cell;GO:0044424//intracellular part;GO:0043228//non-membrane-bounded organelle;GO:0044464//cell part	GO:0005488//binding;GO:0016817//hydrolase activity, acting on acid anhydrides;GO:0001882//nucleoside binding;GO:0036094//small molecule binding;GO:0001883//purine nucleoside binding;GO:0032550//purine ribonucleoside binding;GO:0005198//structural molecule activity;GO:0016462//pyrophosphatase activity;GO:0017111//nucleoside-triphosphatase activity;GO:0097159//organic cyclic compound binding;GO:001…	GO:0044699//single-organism process;GO:0009987//cellular process;GO:0044763//single-organism cellular process
740	gene7545	17	75.3333	0.255	1.14833	2.13059	0.000333312	0.0166232	up	MCHR1	PREDICTED: LOW QUALITY PROTEIN: melanin-concentrating hormone receptor 1 isoform X1 [Ovis aries]	Environmental Information Processing	Signaling molecules and interaction	ko04080//Neuroactive ligand-receptor interaction	K04320	-	-	-
741	gene7549	0	23.1667	0.001	0.668333	7.24478	0.00169387	0.0421449	up	DNAJB7	PREDICTED: LOW QUALITY PROTEIN: dnaJ homolog subfamily B member 7 isoform X1 [Ovis aries]	-	-	-	-	-	-	-
742	gene7567	267.333	526.333	3.66333	7.46667	1.01915	0.00034663	0.0169772	up	DESI1	PREDICTED: desumoylating isopeptidase 1 isoform X3 [Bos taurus]	-	-	-	-	GO:0044424//intracellular part;GO:0044464//cell part;GO:0005622//intracellular;GO:0005623//cell	GO:0016787//hydrolase activity;GO:0003824//catalytic activity;GO:0005488//binding;GO:0005515//protein binding	GO:0043170//macromolecule metabolic process;GO:0044238//primary metabolic process;GO:0019538//protein metabolic process;GO:0071704//organic substance metabolic process;GO:0008152//metabolic process
743	gene7570	0	81.5	0.001	0.745	9.04857	0.000240139	0.0143845	up	C3H22orf46	PREDICTED: trichohyalin-like, partial [Sus scrofa]	-	-	-	-	-	-	-
744	gene7584	0.333333	57.9233	0.0116667	1.77333	6.67773	0.000839635	0.0285176	up	LOC101114261	PREDICTED: formin-like protein 1 isoform X7 [Mesocricetus auratus]	-	-	-	-	-	-	-
745	gene7608	0.833333	114.5	0.005	0.806667	6.66774	9.93787e-05	0.00877636	up	EFCAB6	PREDICTED: LOW QUALITY PROTEIN: EF-hand calcium-binding domain-containing protein 6 isoform X1 [Ovis aries]	-	-	-	-	-	-	-
746	gene7618	7.16667	67.3333	0.0483333	0.468333	3.25314	4.00741e-07	0.000255101	up	KIAA1644	TPA: mKIAA1644 protein-like [Bos taurus]	-	-	-	-	GO:0044425//membrane part;GO:0031224//intrinsic component of membrane;GO:0016020//membrane	-	-
747	gene7627	0	33.6667	0.001	1.14	7.77932	0.000904784	0.0295549	up	RIBC2	PREDICTED: RIB43A-like with coiled-coils protein 2 [Ovis aries]	-	-	-	-	-	-	-
748	gene7655	0	232.667	0.001	6.34333	10.5591	7.32098e-05	0.00787456	up	LOC101112390	PREDICTED: palmitoyltransferase ZDHHC3-like isoform X2 [Ovis aries musimon]	-	-	-	-	-	-	-
749	gene7688	1.16667	92.6667	0.035	2.70333	5.92946	0.000407489	0.0189678	up	ACR	PREDICTED: acrosin isoform X2 [Ovis aries]	-	-	-	-	GO:0044424//intracellular part;GO:0005622//intracellular;GO:0044444//cytoplasmic part;GO:0031410//cytoplasmic vesicle;GO:0043229//intracellular organelle;GO:0016023//cytoplasmic, membrane-bounded vesicle;GO:0031988//membrane-bounded vesicle;GO:0032991//macromolecular complex;GO:0030141//secretory granule;GO:0043231//intracellular membrane-bounded organelle;GO:0099503//secretory vesicle;GO:0005623…	GO:0016811//hydrolase activity, acting on carbon-nitrogen (but not peptide) bonds, in linear amides;GO:0008233//peptidase activity;GO:0048029//monosaccharide binding;GO:0070011//peptidase activity, acting on L-amino acid peptides;GO:0003824//catalytic activity;GO:0016787//hydrolase activity;GO:0004175//endopeptidase activity;GO:0005488//binding;GO:0016810//hydrolase activity, acting on carbon-nit…	GO:0030808//regulation of nucleotide biosynthetic process;GO:0019220//regulation of phosphate metabolic process;GO:0050790//regulation of catalytic activity;GO:0051704//multi-organism process;GO:0045981//positive regulation of nucleotide metabolic process;GO:0044702//single organism reproductive process;GO:0030817//regulation of cAMP biosynthetic process;GO:0045937//positive regulation of phospha…
750	gene7719	43.1867	9.45833	1.87167	0.433333	-2.00957	0.000257794	0.0147689	down	UPP1	PREDICTED: uridine phosphorylase 1 isoform X1 [Ovis aries]	Metabolism	Xenobiotics biodegradation and metabolism;Nucleotide metabolism	ko00240//Pyrimidine metabolism;ko00983//Drug metabolism - other enzymes	K00757	GO:0005623//cell;GO:0044464//cell part;GO:0044424//intracellular part;GO:0005622//intracellular	GO:0016740//transferase activity;GO:0016763//transferase activity, transferring pentosyl groups;GO:0003824//catalytic activity;GO:0016757//transferase activity, transferring glycosyl groups	GO:0006796//phosphate-containing compound metabolic process;GO:0046390//ribose phosphate biosynthetic process;GO:0006220//pyrimidine nucleotide metabolic process;GO:0006221//pyrimidine nucleotide biosynthetic process;GO:1901576//organic substance biosynthetic process;GO:0046134//pyrimidine nucleoside biosynthetic process;GO:0019637//organophosphate metabolic process;GO:0044281//small molecule met…
751	gene7721	0	31.6667	0.001	0.891667	7.69162	0.000999274	0.0310198	up	SUN3	PREDICTED: LOW QUALITY PROTEIN: SUN domain-containing protein 3 isoform X1 [Ovis aries]	-	-	-	-	GO:0043226//organelle;GO:0012505//endomembrane system;GO:0031224//intrinsic component of membrane;GO:0044464//cell part;GO:0043227//membrane-bounded organelle;GO:0016020//membrane;GO:0005622//intracellular;GO:0044446//intracellular organelle part;GO:0043229//intracellular organelle;GO:0031975//envelope;GO:0044422//organelle part;GO:0031967//organelle envelope;GO:0044424//intracellular part;GO:000…	-	-
752	gene7745	275.667	94.6667	1.04667	0.375	-1.40658	3.99801e-06	0.00125813	down	CDK6	PREDICTED: cyclin-dependent kinase 6 isoform X1 [Equus caballus]	Cellular Processes;Environmental Information Processing	Cell growth and death;Signal transduction	ko04151//PI3K-Akt signaling pathway;ko04110//Cell cycle;ko04115//p53 signaling pathway	K02091	GO:0043227//membrane-bounded organelle;GO:0031974//membrane-enclosed lumen;GO:0043233//organelle lumen;GO:0044430//cytoskeletal part;GO:0005634//nucleus;GO:0044424//intracellular part;GO:0005815//microtubule organizing center;GO:0031252//cell leading edge;GO:0043226//organelle;GO:0044428//nuclear part;GO:0043232//intracellular non-membrane-bounded organelle;GO:0043229//intracellular organelle;GO:…	GO:0005515//protein binding;GO:0016773//phosphotransferase activity, alcohol group as acceptor;GO:0097159//organic cyclic compound binding;GO:0016772//transferase activity, transferring phosphorus-containing groups;GO:0036094//small molecule binding;GO:0005488//binding;GO:0016740//transferase activity;GO:0032550//purine ribonucleoside binding;GO:0016301//kinase activity;GO:0032549//ribonucleoside…	GO:0036211//protein modification process;GO:0032501//multicellular organismal process;GO:0051716//cellular response to stimulus;GO:0048856//anatomical structure development;GO:0048522//positive regulation of cellular process;GO:0048583//regulation of response to stimulus;GO:0021761//limbic system development;GO:0043207//response to external biotic stimulus;GO:0030155//regulation of cell adhesion;…
753	gene7843	0	27.5	0.001	0.78	7.48978	0.00127136	0.0359571	up	PRPS1L1	PREDICTED: ribose-phosphate pyrophosphokinase 1-like [Capra hircus]	Metabolism	Global and Overview;Nucleotide metabolism;Carbohydrate metabolism	ko00230//Purine metabolism;ko01200//Carbon metabolism;ko01230//Biosynthesis of amino acids;ko00030//Pentose phosphate pathway	K00948	GO:0044424//intracellular part;GO:0044444//cytoplasmic part;GO:0043234//protein complex;GO:1902494//catalytic complex;GO:0005737//cytoplasm;GO:0061695//transferase complex, transferring phosphorus-containing groups;GO:0032991//macromolecular complex;GO:0044464//cell part;GO:0005622//intracellular;GO:0005623//cell;GO:1990234//transferase complex	GO:0001883//purine nucleoside binding;GO:0016778//diphosphotransferase activity;GO:0005515//protein binding;GO:0003824//catalytic activity;GO:0043169//cation binding;GO:0043167//ion binding;GO:0097367//carbohydrate derivative binding;GO:0036094//small molecule binding;GO:0016740//transferase activity;GO:0016772//transferase activity, transferring phosphorus-containing groups;GO:0032549//ribonucle…	GO:0019693//ribose phosphate metabolic process;GO:1901360//organic cyclic compound metabolic process;GO:0009150//purine ribonucleotide metabolic process;GO:0044281//small molecule metabolic process;GO:0009987//cellular process;GO:0006793//phosphorus metabolic process;GO:0044711//single-organism biosynthetic process;GO:0034641//cellular nitrogen compound metabolic process;GO:1901566//organonitroge…
754	gene7862	80.5783	23.8	0.875	0.231667	-1.8201	0.00175944	0.0433522	down	DNAH11	PREDICTED: dynein heavy chain 11, axonemal isoform X2 [Ovis aries]	-	-	-	-	GO:0032991//macromolecular complex;GO:0044446//intracellular organelle part;GO:0005623//cell;GO:0042995//cell projection;GO:0044422//organelle part;GO:0044424//intracellular part;GO:0015630//microtubule cytoskeleton;GO:0043229//intracellular organelle;GO:0043232//intracellular non-membrane-bounded organelle;GO:0043234//protein complex;GO:0043226//organelle;GO:0072372//primary cilium;GO:0044430//c…	GO:0036094//small molecule binding;GO:0001883//purine nucleoside binding;GO:1901363//heterocyclic compound binding;GO:0016787//hydrolase activity;GO:0017111//nucleoside-triphosphatase activity;GO:0016462//pyrophosphatase activity;GO:0032549//ribonucleoside binding;GO:0016818//hydrolase activity, acting on acid anhydrides, in phosphorus-containing anhydrides;GO:0003774//motor activity;GO:0001882//…	GO:0006928//movement of cell or subcellular component;GO:0065007//biological regulation;GO:0060632//regulation of microtubule-based movement;GO:0040011//locomotion;GO:0032886//regulation of microtubule-based process;GO:0051270//regulation of cellular component movement;GO:0044763//single-organism cellular process;GO:0007275//multicellular organism development;GO:0050794//regulation of cellular pr…
755	gene7928	316.167	141.833	4.28333	1.98333	-1.0756	0.000859013	0.028775	down	PTPN12	PREDICTED: tyrosine-protein phosphatase non-receptor type 12 isoform X2 [Ovis aries]	-	-	-	-	GO:0005622//intracellular;GO:0005623//cell;GO:0044444//cytoplasmic part;GO:0016020//membrane;GO:0044424//intracellular part;GO:0044464//cell part;GO:0005737//cytoplasm	GO:0016787//hydrolase activity;GO:0004721//phosphoprotein phosphatase activity;GO:0042578//phosphoric ester hydrolase activity;GO:0016791//phosphatase activity;GO:0016788//hydrolase activity, acting on ester bonds;GO:0003824//catalytic activity;GO:0005515//protein binding;GO:0005488//binding;GO:0019904//protein domain specific binding	GO:0006470//protein dephosphorylation;GO:0006793//phosphorus metabolic process;GO:0016311//dephosphorylation;GO:0044237//cellular metabolic process;GO:0006796//phosphate-containing compound metabolic process;GO:0044260//cellular macromolecule metabolic process;GO:0044238//primary metabolic process;GO:0043170//macromolecule metabolic process;GO:0019538//protein metabolic process;GO:0009987//cellul…
756	gene7982	1076	439	8.09333	3.35667	-1.234	2.05999e-05	0.00362413	down	LAMB1	PREDICTED: laminin subunit beta-1 [Ovis aries]	Cellular Processes;Environmental Information Processing	Cellular commiunity;Signal transduction;Signaling molecules and interaction	ko04151//PI3K-Akt signaling pathway;ko04510//Focal adhesion;ko04512//ECM-receptor interaction	K05636	GO:0032991//macromolecular complex;GO:0043256//laminin complex;GO:0031012//extracellular matrix;GO:0043230//extracellular organelle;GO:0044420//extracellular matrix component;GO:1903561//extracellular vesicle;GO:0044421//extracellular region part;GO:0043227//membrane-bounded organelle;GO:0005576//extracellular region;GO:0043226//organelle;GO:0005605//basal lamina;GO:0005578//proteinaceous extrace…	-	GO:0048598//embryonic morphogenesis;GO:0007275//multicellular organism development;GO:0006928//movement of cell or subcellular component;GO:0016337//single organismal cell-cell adhesion;GO:0016043//cellular component organization;GO:0051674//localization of cell;GO:0022610//biological adhesion;GO:0001706//endoderm formation;GO:0009887//animal organ morphogenesis;GO:0009790//embryo development;GO:…
757	gene8030	0	32.1667	0.001	2.275	7.71828	0.000574148	0.0228316	up	LOC105610465	-	-	-	-	-	-	-	-
758	gene8032	1668	405.833	11.4733	2.85	-1.90696	1.04029e-05	0.0023962	down	IFRD1	PREDICTED: interferon-related developmental regulator 1 isoform X1 [Ovis aries]	-	-	-	-	GO:0044464//cell part;GO:0005623//cell;GO:0044424//intracellular part;GO:0005622//intracellular	-	GO:0048869//cellular developmental process;GO:0001558//regulation of cell growth;GO:0048856//anatomical structure development;GO:0050794//regulation of cellular process;GO:0042246//tissue regeneration;GO:0042060//wound healing;GO:0045926//negative regulation of growth;GO:0060537//muscle tissue development;GO:0050789//regulation of biological process;GO:0050896//response to stimulus;GO:0040008//re…
759	gene8055	0	29.6667	0.001	0.323333	7.59826	0.00111329	0.0330336	up	DPY19L2	PREDICTED: probable C-mannosyltransferase DPY19L2 isoform X1 [Ovis aries]	-	-	-	-	-	-	-
760	gene8075	183	48.5	1.21667	0.331667	-1.80016	1.90696e-07	0.000146921	down	ADCYAP1R1	PREDICTED: pituitary adenylate cyclase-activating polypeptide type I receptor isoform X1 [Ovis aries musimon]	Organismal Systems;Environmental Information Processing	Signal transduction;Environmental adaptation;Signaling molecules and interaction;Endocrine system	ko04080//Neuroactive ligand-receptor interaction;ko04024//cAMP signaling pathway;ko04713//Circadian entrainment;ko04911//Insulin secretion;ko04924//Renin secretion	K04587	GO:0031224//intrinsic component of membrane;GO:0032991//macromolecular complex;GO:0044425//membrane part;GO:0016020//membrane;GO:0043234//protein complex	GO:0004872//receptor activity;GO:0004930//G-protein coupled receptor activity;GO:0038023//signaling receptor activity;GO:0004871//signal transducer activity;GO:0004888//transmembrane signaling receptor activity;GO:0099600//transmembrane receptor activity;GO:0060089//molecular transducer activity	GO:0050896//response to stimulus;GO:0009987//cellular process;GO:0044699//single-organism process;GO:0044763//single-organism cellular process;GO:0050794//regulation of cellular process;GO:0044700//single organism signaling;GO:0007154//cell communication;GO:0051716//cellular response to stimulus;GO:0065007//biological regulation;GO:0050789//regulation of biological process;GO:0023052//signaling;G…
761	gene8258	0.5	51.1667	0.005	0.526667	6.15016	0.000665917	0.0246596	up	RNF148	PREDICTED: RING finger protein 148 [Ovis aries]	-	-	-	-	GO:0016020//membrane;GO:0044425//membrane part;GO:0031224//intrinsic component of membrane	GO:0005488//binding;GO:0043167//ion binding;GO:0043169//cation binding	-
762	gene8289	0	116.667	0.001	3.11333	9.56593	8.38739e-05	0.00821928	up	FSCN3	PREDICTED: fascin-3-like isoform X1 [Ovis aries musimon]	-	-	-	-	GO:0043229//intracellular organelle;GO:0044424//intracellular part;GO:0005622//intracellular;GO:0044464//cell part;GO:0005623//cell;GO:0043232//intracellular non-membrane-bounded organelle;GO:0043226//organelle;GO:0043228//non-membrane-bounded organelle	GO:0008092//cytoskeletal protein binding;GO:0003779//actin binding;GO:0005515//protein binding;GO:0005488//binding	GO:0051704//multi-organism process;GO:0044703//multi-organism reproductive process;GO:0016043//cellular component organization;GO:0007281//germ cell development;GO:0009987//cellular process;GO:0048609//multicellular organismal reproductive process;GO:0007276//gamete generation;GO:0048856//anatomical structure development;GO:0022412//cellular process involved in reproduction in multicellular organ…
763	gene8300	0	105.167	0.001	3.525	9.41538	0.000177095	0.0122527	up	FAM71F2	PREDICTED: protein FAM71F2 [Ovis aries]	-	-	-	-	-	-	-
764	gene8301	0.166667	80.1667	0.00166667	0.781667	7.82461	8.25594e-05	0.00821928	up	FAM71F1	PREDICTED: protein FAM71F1 isoform X2 [Ovis aries]	-	-	-	-	-	-	-
765	gene8305	18.3333	520.167	0.2	5.78	4.56135	0.000197278	0.0127393	up	CCDC136	PREDICTED: coiled-coil domain-containing protein 136 isoform X4 [Ovis aries musimon]	-	-	-	-	GO:0016020//membrane;GO:0031224//intrinsic component of membrane;GO:0044425//membrane part	-	-
766	gene8310	422.333	109.667	3.60333	0.968333	-1.75276	5.35641e-06	0.00147751	down	KCP	PREDICTED: kielin/chordin-like protein isoform X1 [Ovis aries]	-	-	-	-	GO:0044421//extracellular region part;GO:0005576//extracellular region	-	GO:0009987//cellular process;GO:0007178//transmembrane receptor protein serine/threonine kinase signaling pathway;GO:0070887//cellular response to chemical stimulus;GO:2001141//regulation of RNA biosynthetic process;GO:0006355//regulation of transcription, DNA-templated;GO:0044763//single-organism cellular process;GO:0010556//regulation of macromolecule biosynthetic process;GO:0007167//enzyme lin…
767	gene8386	227.333	102.833	1.855	0.855	-1.07768	0.00136002	0.0375146	down	CREB3L2	PREDICTED: cyclic AMP-responsive element-binding protein 3-like protein 2 isoform X1 [Ovis aries]	Organismal Systems;Environmental Information Processing	Nervous system;Excretory system;Signal transduction;Endocrine system;Circulatory system	ko04151//PI3K-Akt signaling pathway;ko04024//cAMP signaling pathway;ko04022//cGMP - PKG signaling pathway;ko04261//Adrenergic signaling in cardiomyocytes;ko04728//Dopaminergic synapse;ko04152//AMPK signaling pathway;ko04668//TNF signaling pathway;ko04725//Cholinergic synapse;ko04915//Estrogen signaling pathway;ko04916//Melanogenesis;ko04922//Glucagon signaling pathway;ko04911//Insulin secretion;k…	K09048	GO:0043233//organelle lumen;GO:0031981//nuclear lumen;GO:0043231//intracellular membrane-bounded organelle;GO:0005623//cell;GO:0070013//intracellular organelle lumen;GO:0005622//intracellular;GO:0044424//intracellular part;GO:0043229//intracellular organelle;GO:0044446//intracellular organelle part;GO:0044464//cell part;GO:0043227//membrane-bounded organelle;GO:0031974//membrane-enclosed lumen;GO…	GO:0000975//regulatory region DNA binding;GO:0003676//nucleic acid binding;GO:1901363//heterocyclic compound binding;GO:0003700//transcription factor activity, sequence-specific DNA binding;GO:0001067//regulatory region nucleic acid binding;GO:0001071//nucleic acid binding transcription factor activity;GO:0000981//RNA polymerase II transcription factor activity, sequence-specific DNA binding;GO:0…	GO:0043170//macromolecule metabolic process;GO:0019438//aromatic compound biosynthetic process;GO:0006139//nucleobase-containing compound metabolic process;GO:0016192//vesicle-mediated transport;GO:0044700//single organism signaling;GO:0032774//RNA biosynthetic process;GO:0034654//nucleobase-containing compound biosynthetic process;GO:0008152//metabolic process;GO:0048856//anatomical structure de…
768	gene8430	0.333333	83.6667	0.0183333	5.01	7.23211	0.000481787	0.0209427	up	PRSS37	PREDICTED: probable inactive serine protease 37 [Ovis aries]	-	-	-	-	GO:0043226//organelle;GO:0043227//membrane-bounded organelle;GO:0044464//cell part;GO:0043229//intracellular organelle;GO:0005622//intracellular;GO:0043231//intracellular membrane-bounded organelle;GO:0005623//cell;GO:0044424//intracellular part	-	GO:0043170//macromolecule metabolic process;GO:0000003//reproduction;GO:0044699//single-organism process;GO:0071704//organic substance metabolic process;GO:0040011//locomotion;GO:0048870//cell motility;GO:0008152//metabolic process;GO:0035036//sperm-egg recognition;GO:0051704//multi-organism process;GO:0009987//cellular process;GO:0009988//cell-cell recognition;GO:0008037//cell recognition;GO:000…
769	gene8441	0	40.6667	0.001	1.545	8.05004	0.000652851	0.0242303	up	LOC101111274	PREDICTED: probable inactive serine protease 58 [Ovis aries]	-	-	-	-	-	-	-
770	gene8442	0	24.6667	0.001	1.45167	7.33439	0.00150278	0.0392709	up	LOC101111538	PREDICTED: serine protease 58-like [Ovis aries]	-	-	-	-	-	-	-
771	gene8472	0	269.5	0.001	21.7633	10.7721	1.97739e-05	0.00352322	up	C4H7orf34	Chromosome 7 open reading frame 34 [Homo sapiens]	-	-	-	-	-	-	-
772	gene8630	0	71.1667	0.001	1.845	8.85553	0.000161129	0.0117267	up	GALNTL5	PREDICTED: inactive polypeptide N-acetylgalactosaminyltransferase-like protein 5 isoform X1 [Ovis aries]	Metabolism	Glycan biosynthesis and metabolism	ko00512//Mucin type O-glycan biosynthesis	K00710	GO:0016020//membrane;GO:0044425//membrane part;GO:0031224//intrinsic component of membrane	GO:0003824//catalytic activity	-
773	gene8652	0.666667	59.1667	0.0216667	2.02833	5.95008	0.00117697	0.034152	up	RNF32	PREDICTED: RING finger protein 32 isoform X1 [Ovis aries]	-	-	-	-	GO:0016234//inclusion body;GO:0044424//intracellular part;GO:0044464//cell part;GO:0005622//intracellular;GO:0005623//cell	GO:0046872//metal ion binding;GO:0005488//binding;GO:0043167//ion binding;GO:0046914//transition metal ion binding;GO:0043169//cation binding	-
774	gene8667	0	87.5	0.001	3.015	9.15231	0.000122674	0.00981254	up	LOC101120076	PREDICTED: nuclear envelope pore membrane protein POM 121-like isoform X1 [Ovis aries]	-	-	-	-	-	-	-
775	gene867	0.166667	37.8333	0.02	3.755	6.77699	0.000605426	0.0235448	up	C1H1orf194	hCG39930 [Homo sapiens]	-	-	-	-	-	-	-
776	gene869	0.166667	71.5	0.00166667	0.556667	7.65774	0.000172142	0.0120949	up	KIAA1324	PREDICTED: UPF0577 protein KIAA1324 homolog isoform X2 [Ovis aries musimon]	-	-	-	-	GO:0005794//Golgi apparatus;GO:0016020//membrane;GO:0044444//cytoplasmic part;GO:0005622//intracellular;GO:0005576//extracellular region;GO:0071944//cell periphery;GO:0031224//intrinsic component of membrane;GO:0005737//cytoplasm;GO:0031982//vesicle;GO:0044425//membrane part;GO:0005773//vacuole;GO:0005886//plasma membrane;GO:0005768//endosome;GO:0043227//membrane-bounded organelle;GO:0012505//end…	GO:1901363//heterocyclic compound binding;GO:0097159//organic cyclic compound binding;GO:0005488//binding;GO:0003723//RNA binding;GO:0003676//nucleic acid binding	GO:0007165//signal transduction;GO:0006996//organelle organization;GO:0010508//positive regulation of autophagy;GO:0016241//regulation of macroautophagy;GO:0065007//biological regulation;GO:0071840//cellular component organization or biogenesis;GO:0010506//regulation of autophagy;GO:0044699//single-organism process;GO:0050789//regulation of biological process;GO:0012501//programmed cell death;GO:…
777	gene8706	3.33333	53.5	0.0666667	1.09	3.749	0.00170274	0.0421938	up	TRIM17	PREDICTED: E3 ubiquitin-protein ligase TRIM11 isoform X2 [Ovis aries]	-	-	-	-	GO:0044464//cell part;GO:0005623//cell	GO:0016740//transferase activity;GO:0005488//binding;GO:0043167//ion binding;GO:0046914//transition metal ion binding;GO:0019787//ubiquitin-like protein transferase activity;GO:0003824//catalytic activity;GO:0046872//metal ion binding;GO:0043169//cation binding;GO:0005515//protein binding	GO:0044267//cellular protein metabolic process;GO:0033036//macromolecule localization;GO:0032446//protein modification by small protein conjugation;GO:0009987//cellular process;GO:0043170//macromolecule metabolic process;GO:0044260//cellular macromolecule metabolic process;GO:0043412//macromolecule modification;GO:0008152//metabolic process;GO:0071704//organic substance metabolic process;GO:00442…
778	gene8735	8.66667	255.333	0.263333	8.10833	4.53677	0.000583779	0.0229637	up	TSSK6	testis-specific serine kinase 6 [Sus scrofa]	-	-	-	-	-	-	-
779	gene8757	1.83333	97	0.0366667	1.86667	5.34591	0.000649935	0.0242025	up	COMP	PREDICTED: cartilage oligomeric matrix protein isoform X2 [Ovis aries musimon]	Cellular Processes;Environmental Information Processing	Cellular commiunity;Signal transduction;Transport and catabolism;Signaling molecules and interaction	ko04151//PI3K-Akt signaling pathway;ko04510//Focal adhesion;ko04145//Phagosome;ko04512//ECM-receptor interaction	K04659	GO:0044421//extracellular region part;GO:1903561//extracellular vesicle;GO:0005576//extracellular region;GO:0043227//membrane-bounded organelle;GO:0043230//extracellular organelle;GO:0031012//extracellular matrix;GO:0043226//organelle;GO:0031982//vesicle	GO:0046872//metal ion binding;GO:0005488//binding;GO:0043169//cation binding;GO:0032403//protein complex binding;GO:0043167//ion binding;GO:0043168//anion binding;GO:0044877//macromolecular complex binding;GO:0005515//protein binding;GO:0097367//carbohydrate derivative binding;GO:0005539//glycosaminoglycan binding	GO:0012501//programmed cell death;GO:0044767//single-organism developmental process;GO:0008219//cell death;GO:0006915//apoptotic process;GO:0044763//single-organism cellular process;GO:0048589//developmental growth;GO:0007275//multicellular organism development;GO:0035265//organ growth;GO:0040007//growth;GO:0009987//cellular process;GO:0032501//multicellular organismal process;GO:0044699//single-…
780	gene8794	0	20.1667	0.001	5.28833	7.04693	0.0021966	0.0497458	up	INSL3	insulin-like 3 precursor [Ovis aries]	-	-	-	-	-	GO:0005515//protein binding;GO:0005102//receptor binding;GO:0005488//binding;GO:0019899//enzyme binding	GO:0009611//response to wounding;GO:0044707//single-multicellular organism process;GO:0048870//cell motility;GO:0032501//multicellular organismal process;GO:0009987//cellular process;GO:0090132//epithelium migration;GO:0051674//localization of cell;GO:0006928//movement of cell or subcellular component;GO:0040011//locomotion;GO:0044763//single-organism cellular process;GO:0006950//response to stre…
781	gene8839	2.16667	309.667	0.065	9.59167	6.75938	0.000245043	0.0145612	up	CALR3	PREDICTED: calreticulin-3 [Ovis aries]	-	-	-	-	GO:0043226//organelle;GO:0044444//cytoplasmic part;GO:0012505//endomembrane system;GO:0005622//intracellular;GO:0043227//membrane-bounded organelle;GO:0005783//endoplasmic reticulum;GO:0005623//cell;GO:0044446//intracellular organelle part;GO:0044424//intracellular part;GO:0043231//intracellular membrane-bounded organelle;GO:0044464//cell part;GO:0044422//organelle part;GO:0044432//endoplasmic re…	GO:0005488//binding;GO:0043169//cation binding;GO:0005515//protein binding;GO:0043167//ion binding	GO:0000003//reproduction;GO:0044702//single organism reproductive process;GO:0048869//cellular developmental process;GO:0048232//male gamete generation;GO:0032502//developmental process;GO:0051704//multi-organism process;GO:0048609//multicellular organismal reproductive process;GO:0044699//single-organism process;GO:0044703//multi-organism reproductive process;GO:0044763//single-organism cellular…
782	gene8848	3808.33	1630.67	78.005	34.5217	-1.12719	5.04251e-07	0.000282788	down	TPM4	PREDICTED: tropomyosin alpha-4 chain isoformX2 [Canis lupus familiaris]	Organismal Systems	Circulatory system	ko04261//Adrenergic signaling in cardiomyocytes;ko04260//Cardiac muscle contraction	K10375	-	-	-
[truncated: 28 more rows]

## Sheet: Table S6
Table S6. DEGs related to production performance and meat quality in the STH×MG and the STH sheep breeds
[truncated: 132 more rows]

[truncated: 1 more sheets: Table S7]
